# Supplementary material for: Whole genome sequencing identifies structural variants contributing to hematologic traits in the NHLBI TOPMed program
Source: PubMed Central journal article supplement (PMC9732337; doi:10.1038/s41467-022-35354-7), 2022-12-08
Supplement: 41467_2022_35354_MOESM2_ESM.pdf [file 41467_2022_35354_MOESM2_ESM.pdf]

## **Description of Additional Supplementary Files**

File Name: Supplementary Data 1

Description: The number of participants grouped by predicted ancestry in each TOPMed Study. Discrete ancestry subgroups are based on genetically inferred ancestry and a machine learning algorithm that refines self-identified ancestry.

File Name: Supplementary Data 2

Description: Replication results for TOPMed structural variants significantly associated with hematological traits. All p-values are derived from two-sided t-tests and are not adjusted for multiple comparisons.

File Name: Supplementary Data 3

Description: Functional annotation for structural variants significantly associated with hematological traits.

File Name: Supplementary Data 4

Description: Summary of sgRNA sequences used in the present study.

File Name: Supplementary Data 5

Description: Summary of PCR primers used in the present study.

File Name: Supplementary Data 6

Description: Information on TOPMed cohorts used in this study.
