# Supplementary material for: Whole genome sequencing identifies structural variants contributing to hematologic traits in the NHLBI TOPMed program
Source: Springer Nature journal article supplement (doi:10.1038/s41467-022-35354-7), 2022-12-08
Supplement: MOESM1 [file 41467_2022_35354_MOESM1_ESM.pdf]

## SUPPLEMENTARY INFORMATION

### Participating studies

#### *Amish*

The Amish Complex Disease Research Program includes a set of large community-based studies focused largely on cardiometabolic health carried out in the Old Order Amish (OOA) community of Lancaster, Pennsylvania (<http://medschool.umaryland.edu/endocrinology/amish/research-program.asp>). The OOA population of Lancaster County, PA immigrated to the Colonies from Western Europe in the early 1700's. There are now over 30,000 OOA individuals in the Lancaster area, nearly all of whom can trace their ancestry back 12-14 generations to approximately 700 founders. Investigators at the University of Maryland School of Medicine have been studying the genetic determinants of cardiometabolic health in this population since 1993. To date, over 7,000 Amish adults have participated in one or more of our studies.

Due to their ancestral history, the OOA are enriched for rare exonic variants that arose in the population from a single founder (or small number of founders) and propagated through genetic drift. Many of these variants have large effect sizes and identifying them can lead to new biological insights about health and disease. The parent study for this WGS project provides one (of multiple) examples. In our parent study, we identified through a genome-wide association analysis a haplotype that was highly enriched in the OOA that is associated with very high LDL-cholesterol levels. At the present time, the identity of the causative SNP – and even the implicated gene – is not known because the associated haplotype contains numerous genes, none of which are obvious lipid candidate genes. A major goal of the WGS that will be obtained through the NHLBI TOPMed Consortium will be to identify functional variants that underlie some of the large effect associations observed in this unique population. All study protocols were approved by the institutional review board at the University of Maryland Baltimore. Informed consent was obtained from each study participant.

#### *ARIC*

The ARIC study is a population-based prospective cohort study of cardiovascular disease sponsored by the National Heart, Lung, and Blood Institute (NHLBI). ARIC included 15,792 individuals, predominantly European American and African American, aged 45-64 years at baseline (1987-89), chosen by probability sampling from four US communities. Cohort members completed three additional triennial follow-up examinations, a fifth exam in 2011-2013, a sixth exam in 2016-2017, and a seventh exam in 2018-2019. The ARIC study has been described in detail previously (The ARIC Investigators. The Atherosclerosis Risk in Communities (ARIC) study: Design and objectives. *American Journal of Epidemiology* 1989;129:687-702). All ARIC participants provided written informed consent, and the study was approved by the Institutional Review Boards of the participating centers.

#### *BioMe*

The Charles Bronfman Institute for Personalized Medicine at Mount Sinai Medical Center (MSMC), BioMe Biobank, founded in September 2007, is an ongoing, broadly-consented electronic health record-linked clinical care biobank that enrolls participants non-selectively from the Mount Sinai Medical Center patient population. The MSMC serves diverse local communities of upper Manhattan, including Central Harlem (86% African American), East Harlem (88% Hispanic/Latino), and Upper East Side (88% Caucasian/White) with broad health disparities. The BioMe cohort was approved by the Institutional Review Board at the Icahn School of Medicine at Mount Sinai. All BioMe participants provided written, informed consent for genomic data sharing.

#### *CARDIA*

The Coronary Artery Risk Development in Young Adults (CARDIA) Study is a study examining the development and determinants of clinical and subclinical cardiovascular disease and their risk factors. It began in 1985-1986

with a group of 5,115 black and white men and women aged 18-30 years. The participants were selected so that there would be approximately the same number of people in subgroups of race, gender, education (high school or less and more than high school) and age (18-24 and 25-30) in each of 4 centers: Birmingham, AL; Chicago, IL; Minneapolis, MN; and Oakland, CA. All CARDIA participants provided informed consent, and the study was approved by the Institutional Review Boards of the University of Alabama at Birmingham and the University of Texas Health Science Center at Houston.

### *CHS*

The Cardiovascular Health Study (CHS) is a population-based cohort study of risk factors for coronary heart disease and stroke in adults 65 years and older conducted across four field centers<sup>2</sup>. The original predominantly European ancestry cohort of 5,201 persons was recruited in 1989-1990 from random samples of people on Medicare eligibility lists from four US communities. Subsequently, an additional predominantly African-American cohort of 687 persons was enrolled for a total sample of 5,888. Institutional review committees at each field center approved the CHS, and participants gave informed consent. Blood samples were drawn from all participants at their baseline examination, and DNA was subsequently extracted from available samples. These analyses were limited to participants with available DNA who also consented to genetic studies. Participants were examined annually from enrollment to 1999 and continued to be under surveillance for stroke following 1999. All CHS participants provided informed consent, and the study was approved by the Institutional Review Board [or ethics review committee] of University Washington.

### *COPDGene*

COPDGene (also known as the Genetic Epidemiology of COPD Study) is an NIH-funded, multicenter study. A study population of more than 10,000 smokers (1/3 African American and 2/3 non-Hispanic White) has been characterized with a study protocol including pulmonary function tests, chest CT scans, six minute walk testing, and multiple questionnaires. Five years after this initial visit, all available study participants are being brought back for a follow-up visit with a similar study protocol. This study has been used for epidemiologic and genetic studies. Previous genetic analysis in this study has been based on genome-wide SNP genotyping data. Approximately 1,900 subjects underwent whole genome sequencing in this NHLBI WGS project, including severe COPD subjects and resistant smoking controls. The COPDGene Study web site is: <http://www.copdgene.org/>. All COPDGene participants provided written informed consent, and the study was approved by the Institutional Review Boards of the participating clinical centers.

### *FHS*

FHS is a three-generation, single-site, community-based, ongoing cohort study that was initiated in 1948 to investigate prospectively the risk factors for CVD including stroke. It now comprises 3 generations of participants: the Original cohort followed since 1948; their Offspring and spouses of the Offspring, followed since 1971<sup>4</sup>; and children from the largest Offspring families enrolled in 2002 (Gen 3). The Original cohort enrolled 5,209 men and women who comprised two-thirds of the adult population then residing in Framingham, MA. Survivors continue to receive biennial examinations. The Offspring cohort comprises 5,124 persons (including 3,514 biological offspring) who have been examined approximately once every 4 years. The Gen 3 cohort contains 4,095 participants. The Framingham Heart Study was approved by the Institutional Review Board of the Boston University Medical Center. All study participants provided written informed consent.

### *GeneSTAR*

In 1982 The Johns Hopkins Sibling and Family Heart Study was created to study patterns of coronary heart disease and related risk factors in families with early-onset coronary disease, identified from 10 Baltimore area hospitals. Renamed in 2003, the Genetic Study of Atherosclerosis Risk (GeneSTAR) continues to study mechanisms of coronary heart disease and stroke in families using novel models and exciting new methods. GeneSTAR is a family-based study including initially healthy brothers and sisters identified from probands with

early-onset coronary disease, along with the healthy offspring of the siblings and the probands. The goal is to discover and amplify mechanisms of stroke and coronary heart disease. Our African American and European American family cohort has undergone extensive screening, genetic testing, and follow-up for new cardiovascular disease, stroke, and other clinical events for 5 to 38 years. All participants provided written informed consent and the study was approved by the Johns Hopkins Medicine Institutional Review Board.

#### *HCHS/SOL*

The Hispanic Community Health Study/Study of Latinos (HCHS/SOL) is a multi-center study of Hispanic/Latino populations with the goal of determining the role of acculturation in the prevalence and development of diseases, and to identify other traits that impact Hispanic/Latino health. The study is sponsored by the National Heart, Lung, and Blood Institute (NHLBI) and other institutes, centers, and offices of the National Institutes of Health (NIH). Recruitment began in 2006 with a target population of 16,000 persons of Cuban, Puerto Rican, Dominican, Mexican or Central/South American origin. Participants were recruited through four sites affiliated with San Diego State University, Northwestern University in Chicago, Albert Einstein College of Medicine in Bronx, New York, and the University of Miami. Recruitment was implemented through a two-stage area household probability design. The study enrolled 16,415 participants who were self-identified Hispanic/Latino and aged 18-74 years, and the extensive psycho-social and clinical assessments were conducted during 2008-2011. Annual telephone follow-up interviews are ongoing since study inception. During the 2014-2017 second visit, the participants were re-examined again for various health outcomes of interest. This study was approved by the institutional review boards (IRBs) at each field center, where all participants gave written informed consent, and by the Non-Biomedical IRB at the University of North Carolina at Chapel Hill, to the HCHS/SOL Data Coordinating Center. All IRBs approving the study are: Non-Biomedical IRB at the University of North Carolina at Chapel Hill. Chapel Hill, NC; Einstein IRB at the Albert Einstein College of Medicine of Yeshiva University. Bronx, NY; IRB at Office for the Protection of Research Subjects (OPRS), University of Illinois at Chicago. Chicago, IL; Human Subject Research Office, University of Miami. Miami, FL; Institutional Review Board of San Diego State University. San Diego, CA.

#### *JHS*

The Jackson Heart Study (JHS, <https://www.jacksonheartstudy.org/jhsinfo/>) is a large, community-based, observational study whose participants were recruited from urban and rural areas of the three counties (Hinds, Madison and Rankin) that make up the Jackson, MS metropolitan statistical area (MSA). Participants were enrolled from each of 4 recruitment pools: random, 17%; volunteer, 30%; currently enrolled in the Atherosclerosis Risk in Communities (ARIC) Study, 31% and secondary family members, 22%. Recruitment was limited to non-institutionalized adult African Americans 35-84 years old, except in a nested family cohort where those 21 to 34 years of age were also eligible. The final cohort of 5,306 participants included 6.59% of all African American Jackson MSA residents aged 35-84 during the baseline exam (N=76,426, US Census 2000). Among these, approximately 3,700 gave consent that allows genetic research and deposition of data into dbGaP, with 3406 participants with post-QC TOPMed whole genome sequencing data. Major components of three clinic examinations (Exam 1 – 2000-2004; Exam 2 – 2005-2008; Exam 3 – 2009-2013) include medical history, physical examination, blood/urine analytes and interview questions on areas such as: physical activity; stress, coping and spirituality; racism and discrimination; socioeconomic position; and access to health care. Extensive clinical phenotyping includes anthropometrics, electrocardiography, carotid ultrasound, ankle-brachial blood pressure index, echocardiography, CT chest and abdomen for coronary and aortic calcification, liver fat, and subcutaneous and visceral fat measurement, and cardiac MRI. At 12-month intervals after the baseline clinic visit (Exam 1), participants have been contacted by telephone to: update information; confirm vital statistics; document interim medical events, hospitalizations, and functional status; and obtain additional sociocultural information. Questions about medical events, symptoms of cardiovascular disease and functional status are repeated annually. Ongoing cohort surveillance includes abstraction of medical records and death certificates for relevant International Classification of Diseases (ICD) codes and adjudication of nonfatal events and deaths.

CMS data are currently being incorporated into the dataset. The JHS study was approved by Jackson State University, Tougaloo College, and the University of Mississippi Medical Center IRBs, and all participants provided written informed consent.

### *MESA*

The MESA study is a study of the characteristics of subclinical cardiovascular disease (disease detected non-invasively before it has produced clinical signs and symptoms) and the risk factors that predict progression to clinically overt cardiovascular disease or progression of the subclinical disease <sup>7</sup>. MESA researchers study a diverse, population-based sample of 6,814 asymptomatic men and women aged 45-84. Thirty-eight percent of the recruited participants are white, 28 percent African-American, 22 percent Hispanic, and 12 percent Asian, predominantly of Chinese descent. Participants were recruited from six field centers across the United States: Wake Forest University, Columbia University, Johns Hopkins University, University of Minnesota, Northwestern University and the University of California - Los Angeles. All MESA participants provided written informed consent, and the study was approved by the Institutional Review Boards at The Lundquist Institute (formerly Los Angeles BioMedical Research Institute) at Harbor-UCLA Medical Center, University of Washington, Wake Forest School of Medicine, Northwestern University, University of Minnesota, Columbia University, and Johns Hopkins University.

### *WHI*

The Women's Health Initiative (WHI) is a long-term, prospective, multi-center cohort study that investigates post-menopausal women's health. WHI was funded by the National Institutes of Health and the National Heart, Lung, and Blood Institute to study strategies to prevent heart disease, breast cancer, colon cancer, and osteoporotic fractures in women 50-79 years of age. WHI involves 161,808 women recruited between 1993 and 1998 at 40 centers across the US. The study consists of two parts: the WHI Clinical Trial which was a randomized clinical trial of hormone therapy, dietary modification, and calcium/Vitamin D supplementation, and the WHI Observational Study, which focused on many of the inequities in women's health research and provided practical information about the incidence, risk factors, and interventions related to heart disease, cancer, and osteoporotic fractures. All WHI participants provided informed consent and the study was approved by the Institutional Review Board (IRB) of the Fred Hutchinson Cancer Research Center.

### *deCODE*

All participants who donated samples gave informed consent and the National Bioethics Committee of Iceland approved the study which was in agreement with conditions issued by the Data Protection Authority of Iceland (VSN\_140-015). Personal identities of the participant's data and biological samples were encrypted by a third-party system (Identify Protection System), approved and monitored by the Data Protection Authority.

## **Supplementary Methods**

### *Genetic Ancestry and Relatedness*

Principal components (PCs) of genetic ancestry and pairwise relatedness measures were estimated for all 140,062 samples included in the TOPMed 'Freeze 8' data release. Autosomal genetic variants passing the quality filter with a MAF > 0.01 and missing call rate < 0.01 were LD-pruned with an  $r^2$  threshold of 0.1 to obtain a set of 638,486 effectively independent variants for genetic ancestry and relatedness estimation. PC-AiR was used to obtain ancestry informative PCs robust to familial relatedness; the first 11 PCs showed evidence of population structure. PC-Relate was then used to estimate pairwise kinship coefficients (KCs) for all pairs of samples, conditional on the genetic ancestry captured by PC-AiR PCs 1-11; these KC estimates reflect only recent genetic relatedness, e.g. due to pedigree structure. The PC-Relate KC estimates were used to construct a 4th degree sparse, block-diagonal, empirical kinship matrix (KM) for association testing, any pair of samples with estimated

$KC > 2^{(-11/2)} \sim 0.022$  were clustered in the same block; all KC estimates within a block of samples were kept, regardless of value; and all KC estimates between blocks were set to 0. By using a sparse block-diagonal KM, the association tests are more computationally efficient yet recent genetic relatedness is still accounted for. We subset the freeze-wide PCs and sparse KM to the appropriate set of participants for each analysis.

### *Classification of race/ethnicity groups using HARE*

Ancestry groups were based on a combination of participants reported race/ethnicity and genetic ancestry represented by PCs from PC-AiR. To infer race/population group membership for participants with missing values, we used the HARE method, a machine learning algorithm that uses a support vector machine (SVM) to determine stratum assignment, taking as input genetically estimated PC values and reported race/ethnicity for each participant. Strata are defined by the unique reported race/ethnicity values provided, then the HARE SVM uses the input (training) data to learn the probability of stratum membership across the entire PC space. The output of HARE consists of multinomial probability vectors of stratum membership for each participant. HARE was run on a subset of samples included in the TOPMed Freeze 8 data release; specifically, samples for participants from non-US-based studies and the Amish participants (because they were very distinct in PC space) were excluded from the HARE analysis. HARE was run using the first 9 PC-AiR PCs generated on this subset of samples to represent genetic ancestry with the following reported race/population groups: Asian, Black, Central American, Cuban, Dominican, Mexican, Puerto Rican, South American, and White. The genetic data from the 31,918 participants with either unreported or non-specific (e.g. 'Multiple' or 'Other') race and population membership was included in the HARE analysis, but they were not used to train the SVM. These participants were assigned to a population stratum based on their highest HARE output probability of membership. All other participants remained in the population stratum corresponding to their reported race/population group. Amish participants were assigned to their own stratum.

### **Supplementary Figures**

**Figure S1. QQ plots of the marginal structural variant analyses in TOPMed.** All p-values are derived from two-sided t-tests and are not adjusted for multiple comparisons. (A) HCT; (B) HGB; (C) MCH; (D) MCHC; (E) MCV; (F) RBC; (G) RDW; (H) BASO\_binary; (I) EOSIN; (J) LYMPHS; (K) MONOS; (L) NEUTRO; (M) WBC; (N) EOSIN%; (O) LYMPHS%; (P) MONOS%; (Q) NEUTRO%; (R) MPV; (S) PLT; (T) FERRITIN; (U) IRON; (V) SAT; (W) UIBC; (X) TIBC.

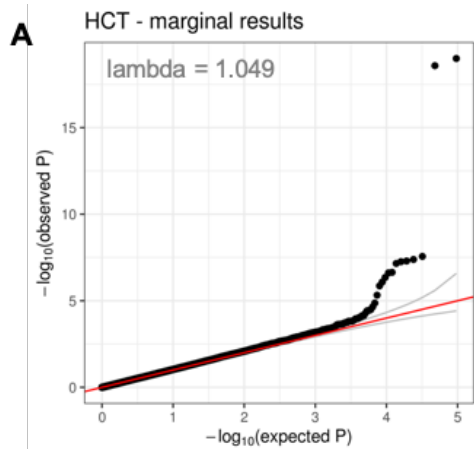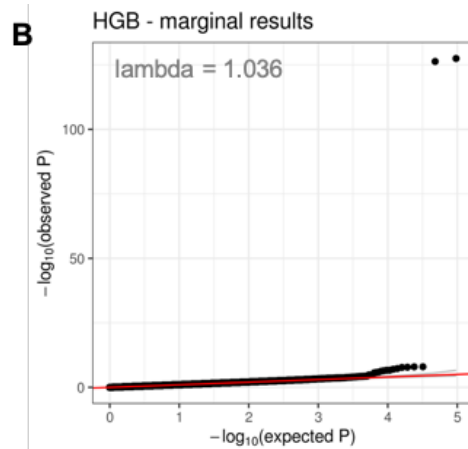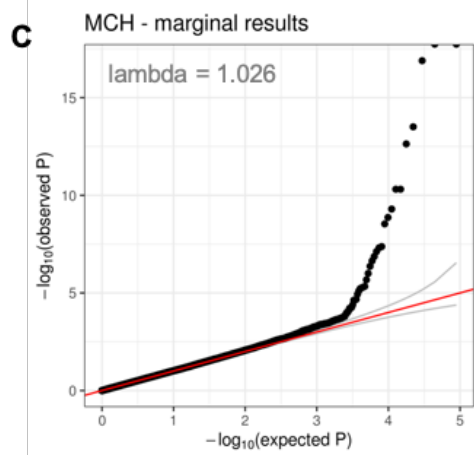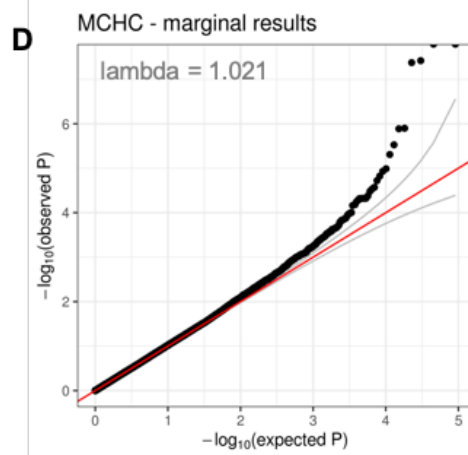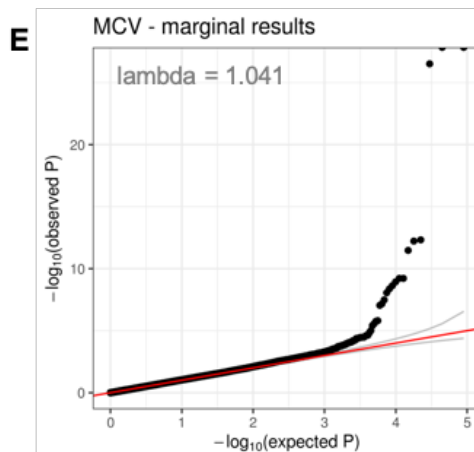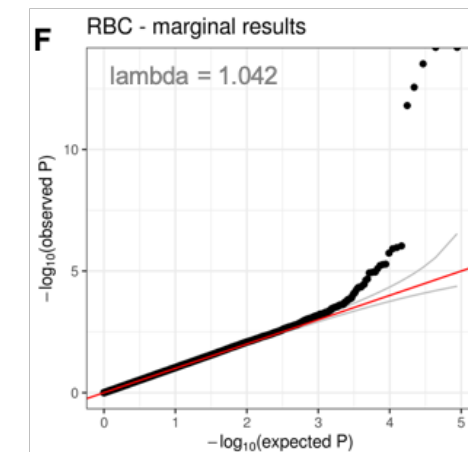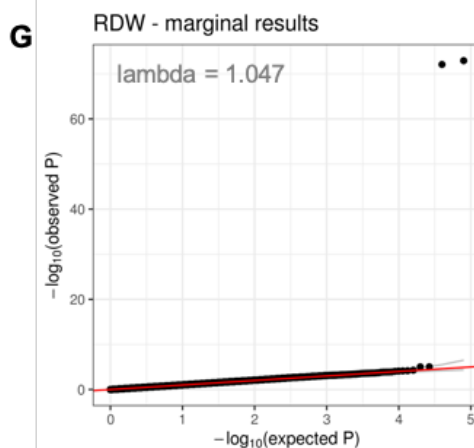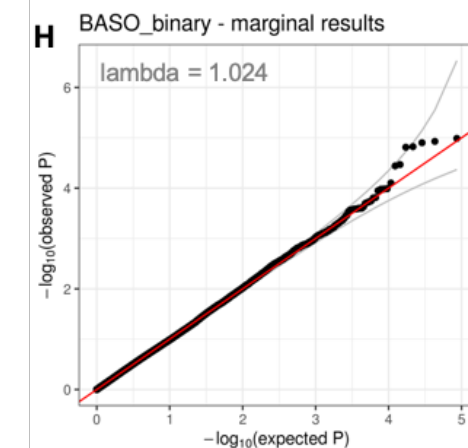

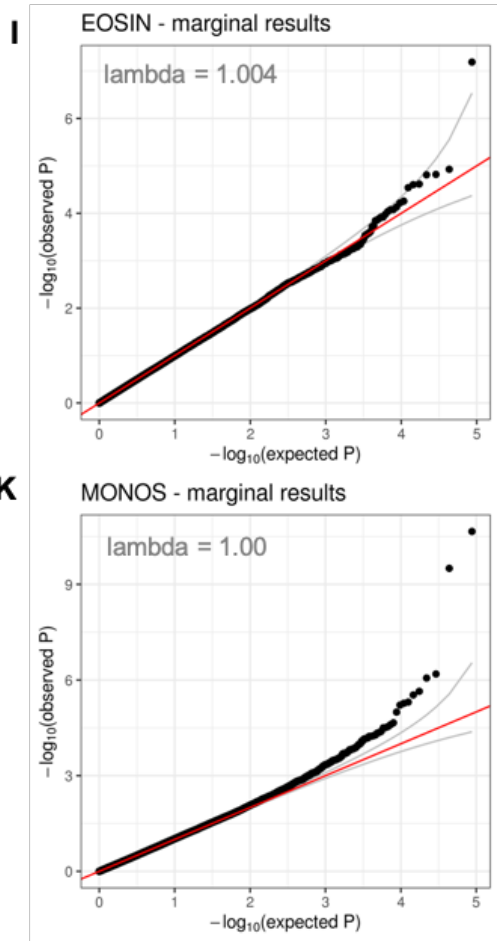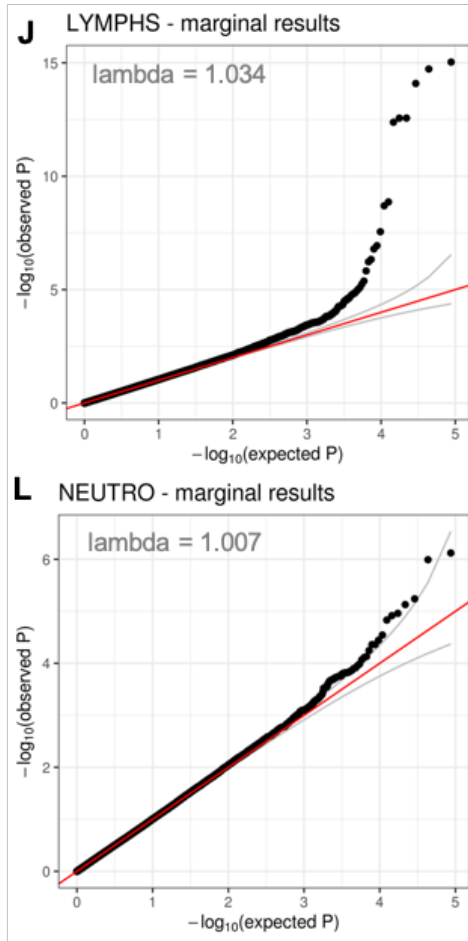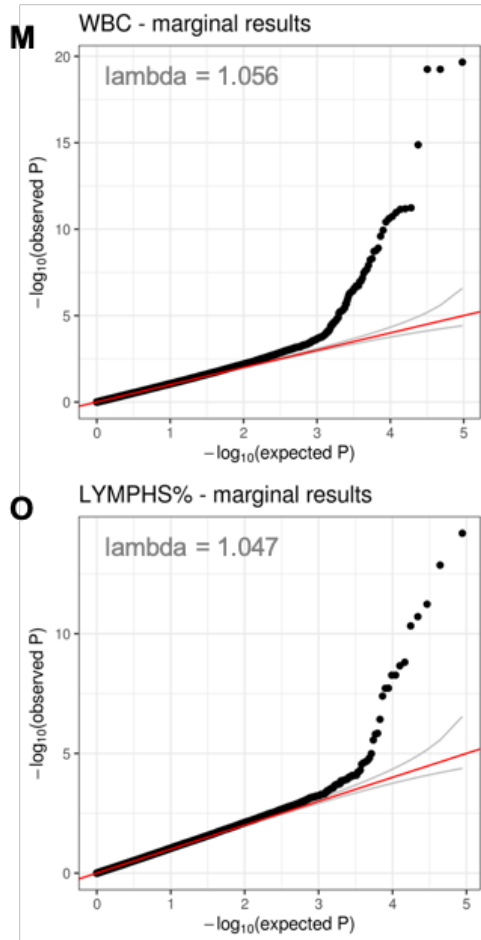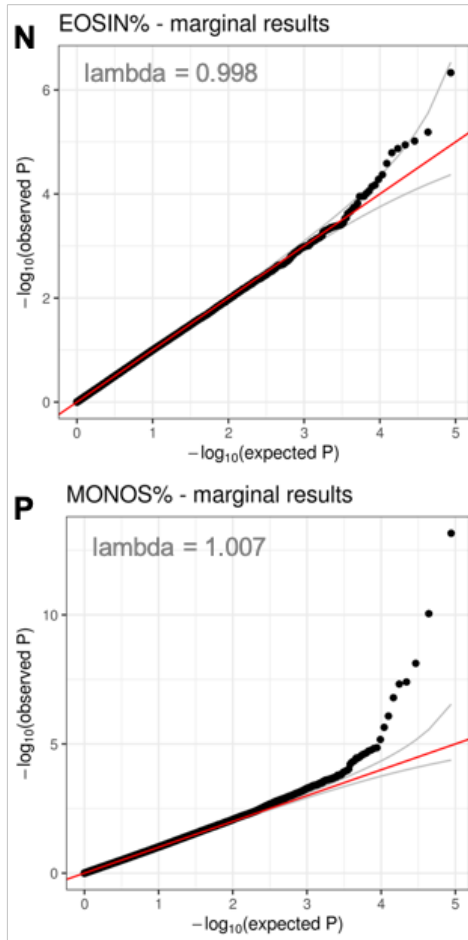

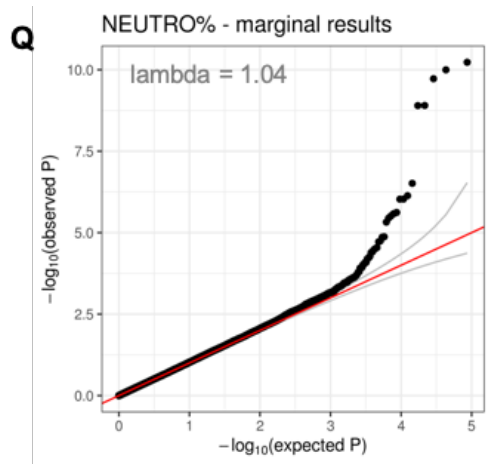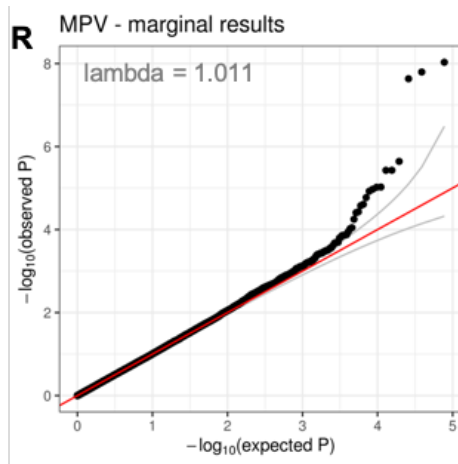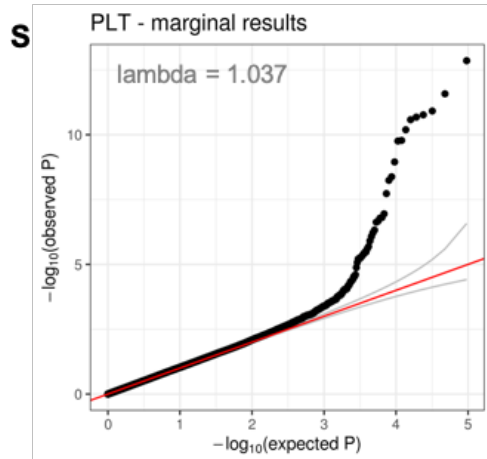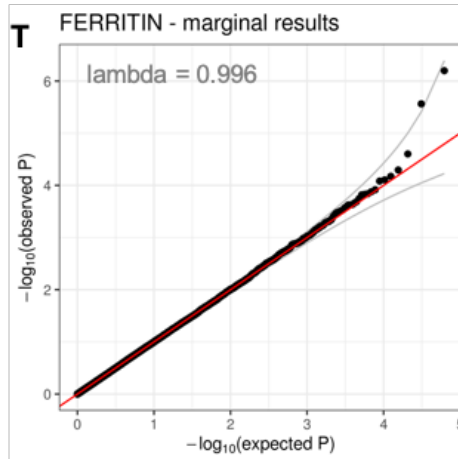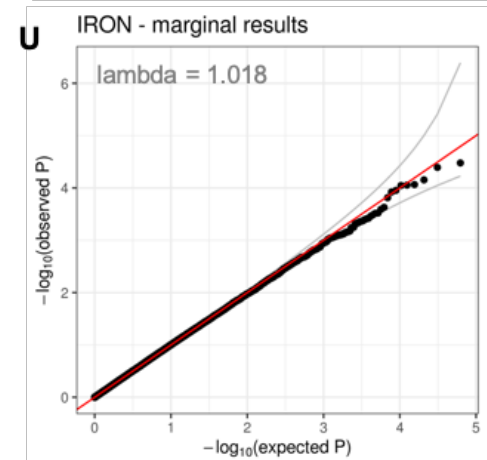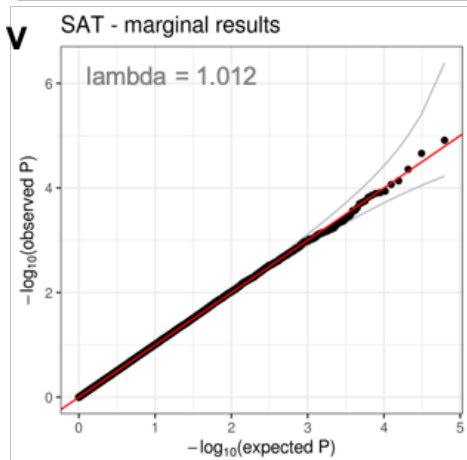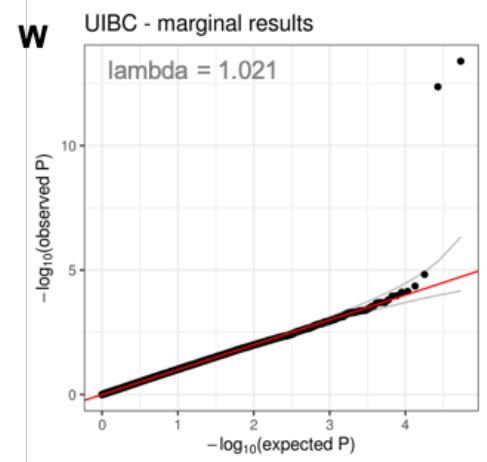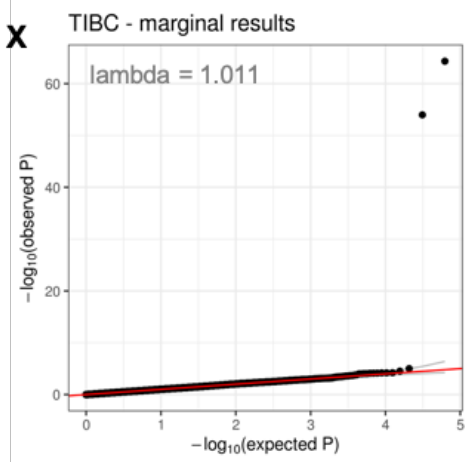

**Figure S2.QQ plots of the marginal structural variant analyses in TOPMed stratified by minor allele count.** The ranges for minor allele count are labeled on the top of each QQ plot. All p-values are derived from two-sided t-tests and are not adjusted for multiple comparisons. (A) HCT; (B) HGB; (C) MCH; (D) MCHC; (E) MCV; (F) RBC; (G) RDW; (H) BASO\_binary; (I) EOSIN; (J) LYMPHS; (K) MONOS; (L) NEUTRO; (M) WBC; (N) EOSIN%; (O) LYMPHS%; (P) MONOS%; (Q) NEUTRO%; (R) MPV; (S) PLT; (T) FERRITIN; (U) IRON; (V) SAT; (W) UIBC; (X) TIBC.

**A**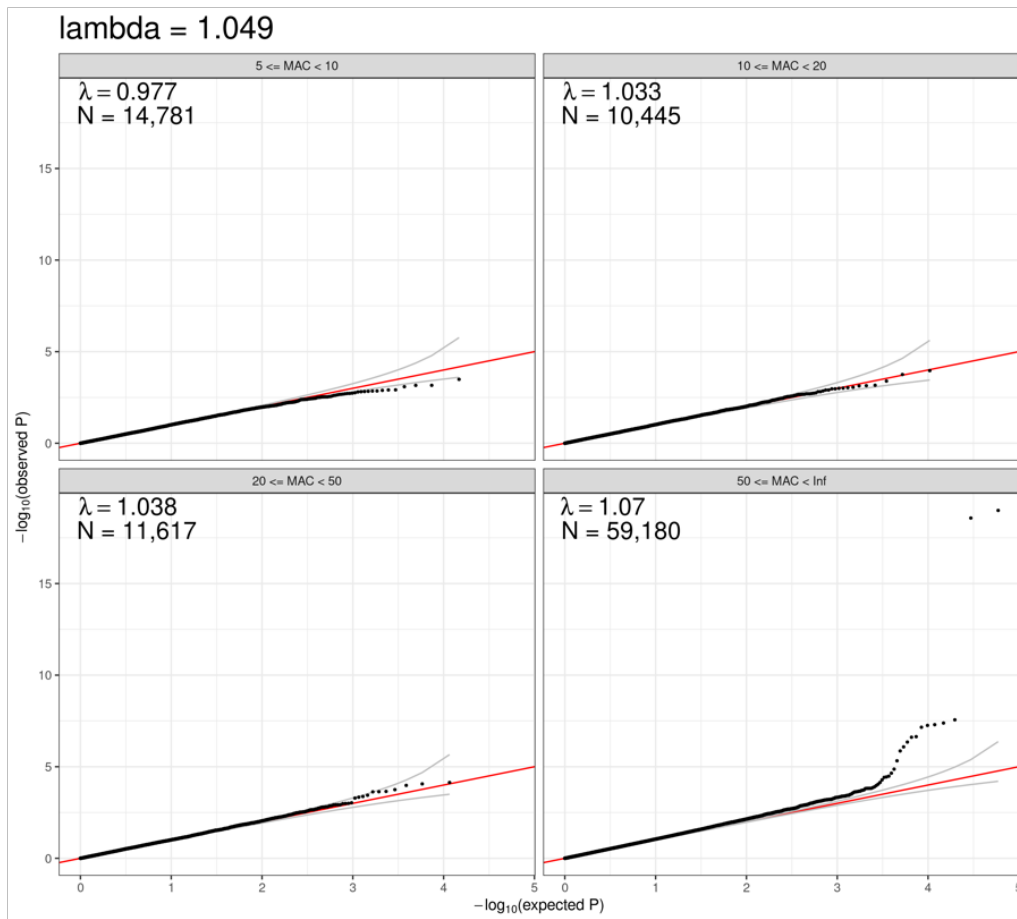**B**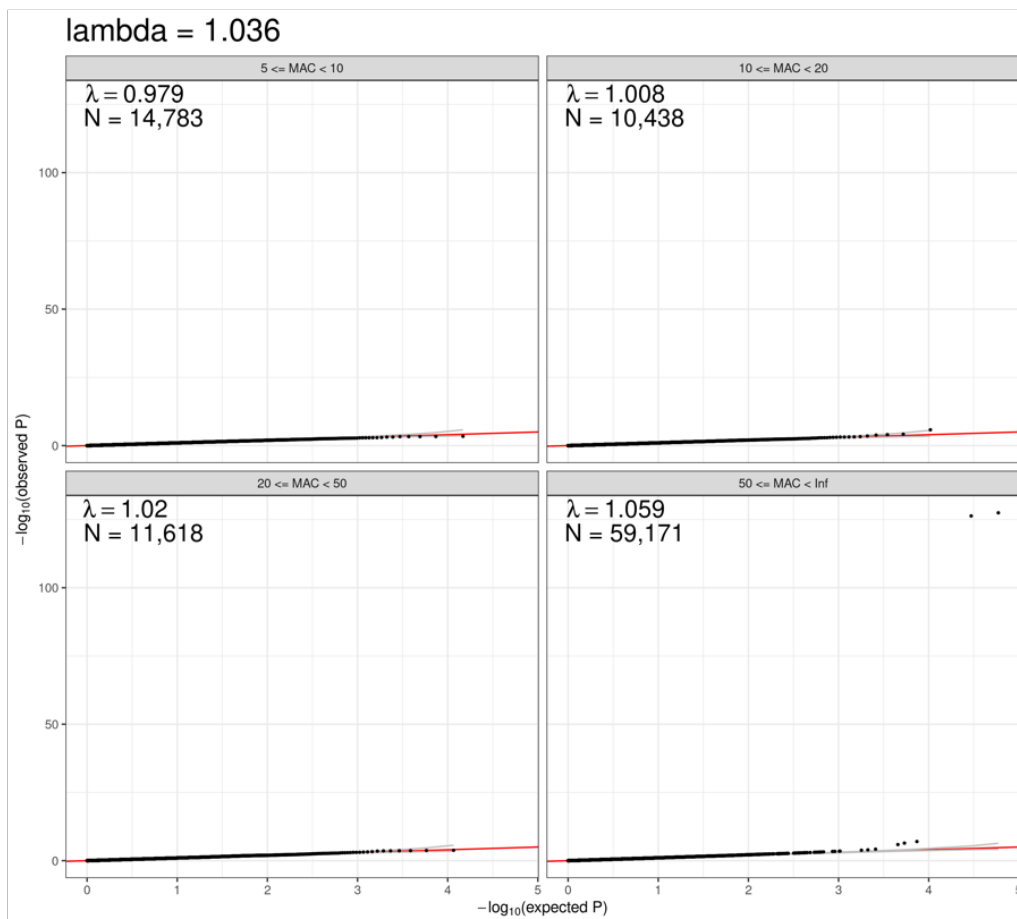

**C** $\lambda = 1.026$ 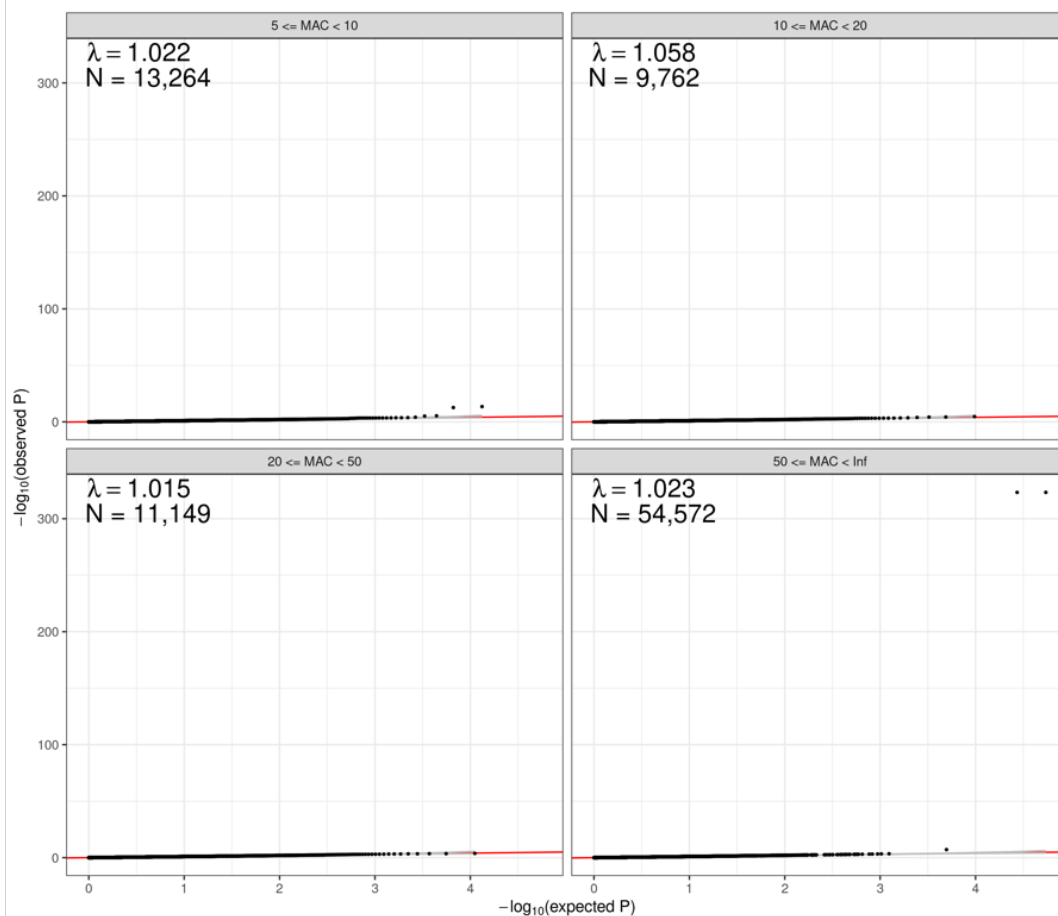**D** $\lambda = 1.021$ 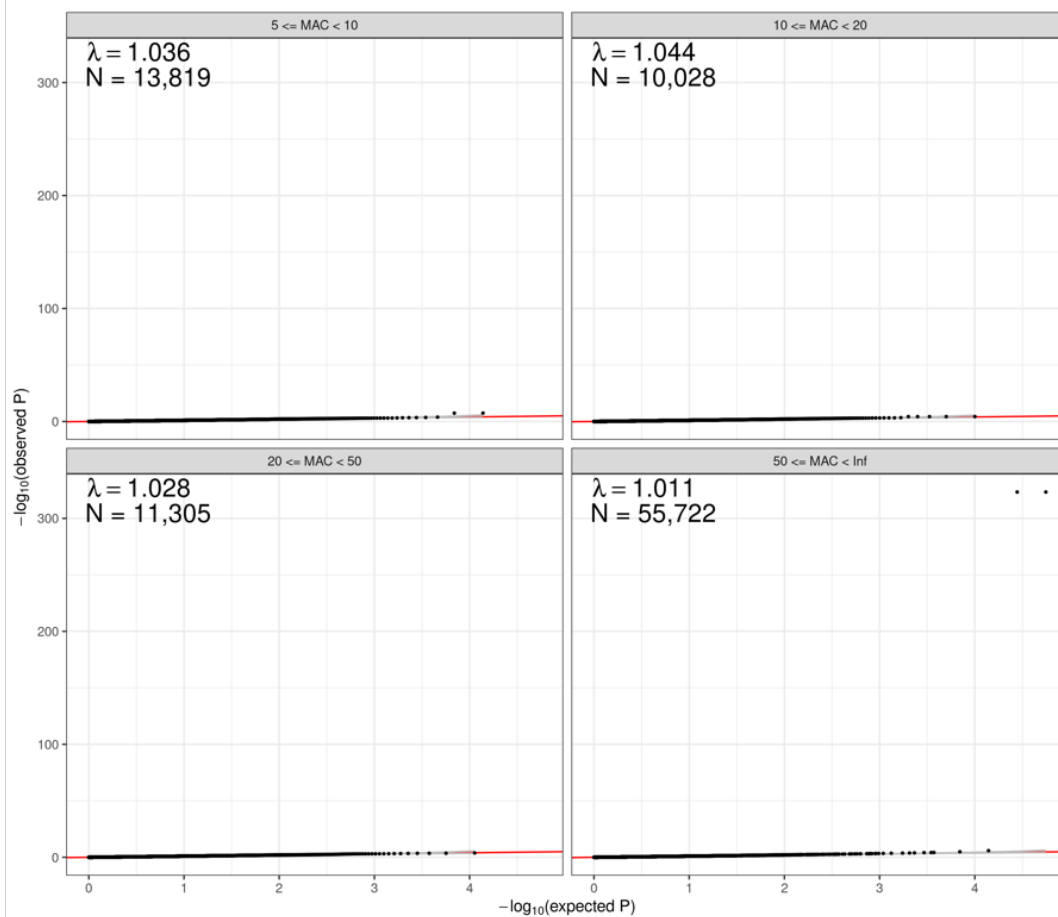

**E**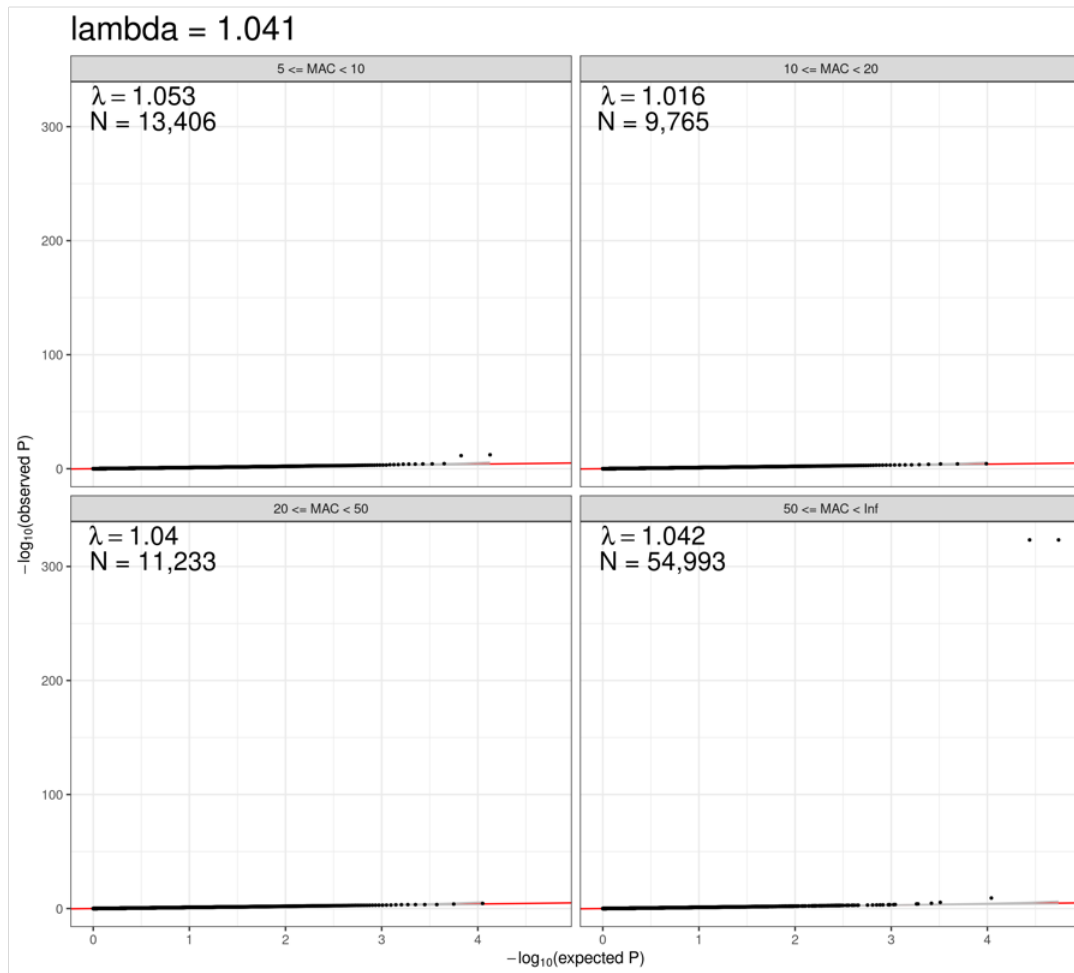**F**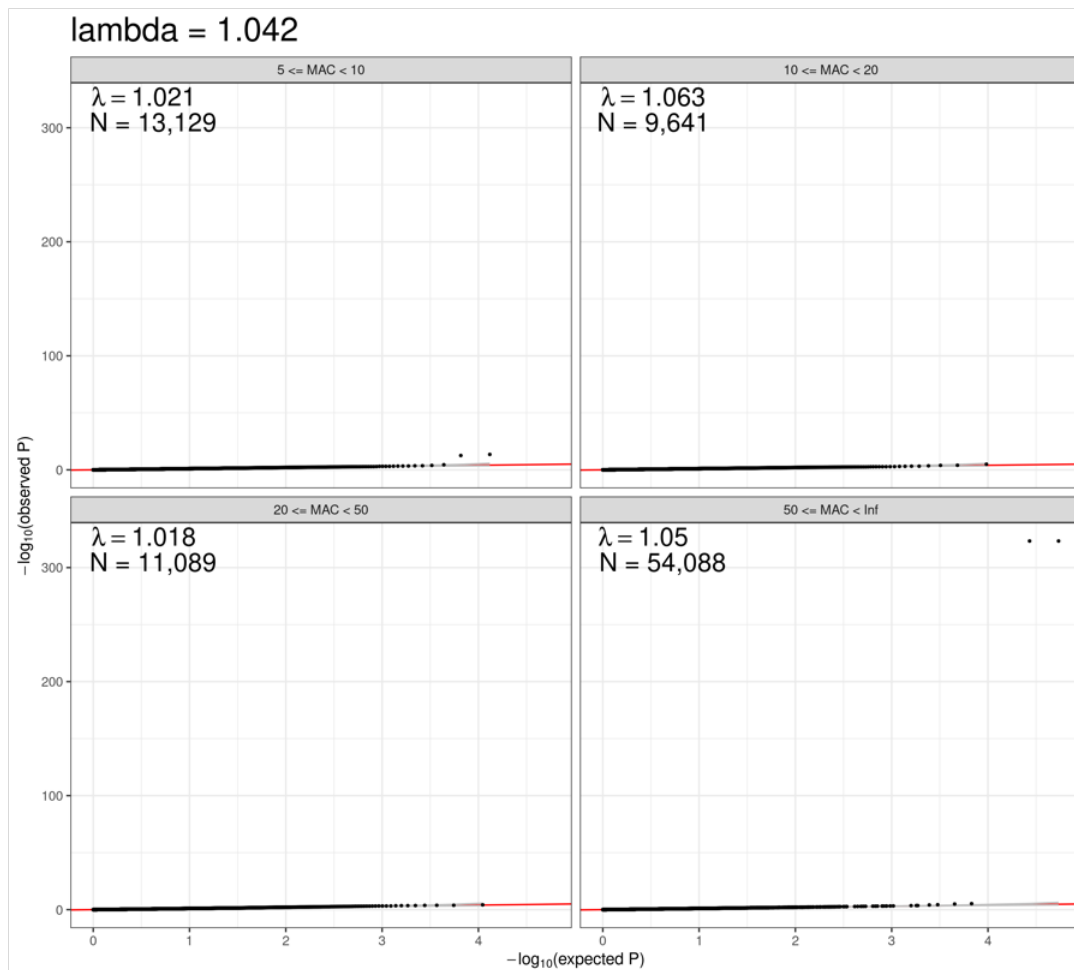

**G** $\lambda = 1.047$ 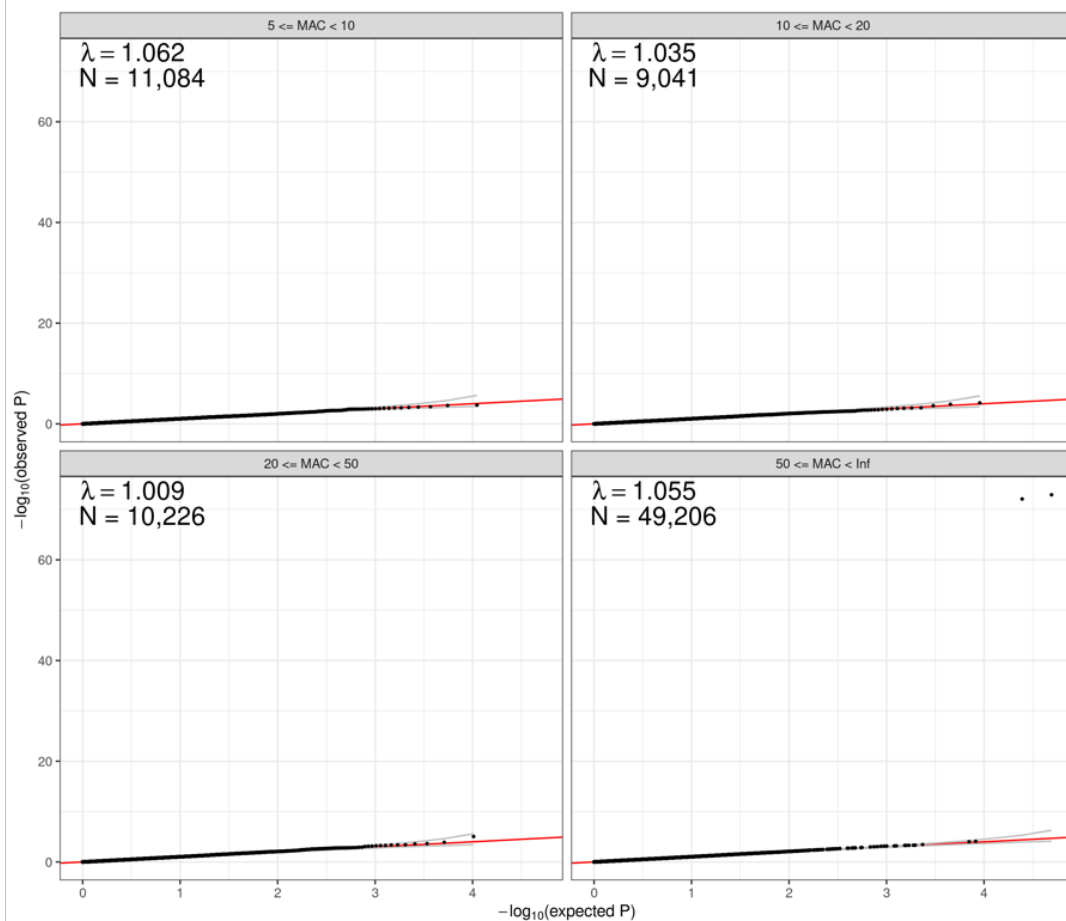**H** $\lambda = 1.024$ 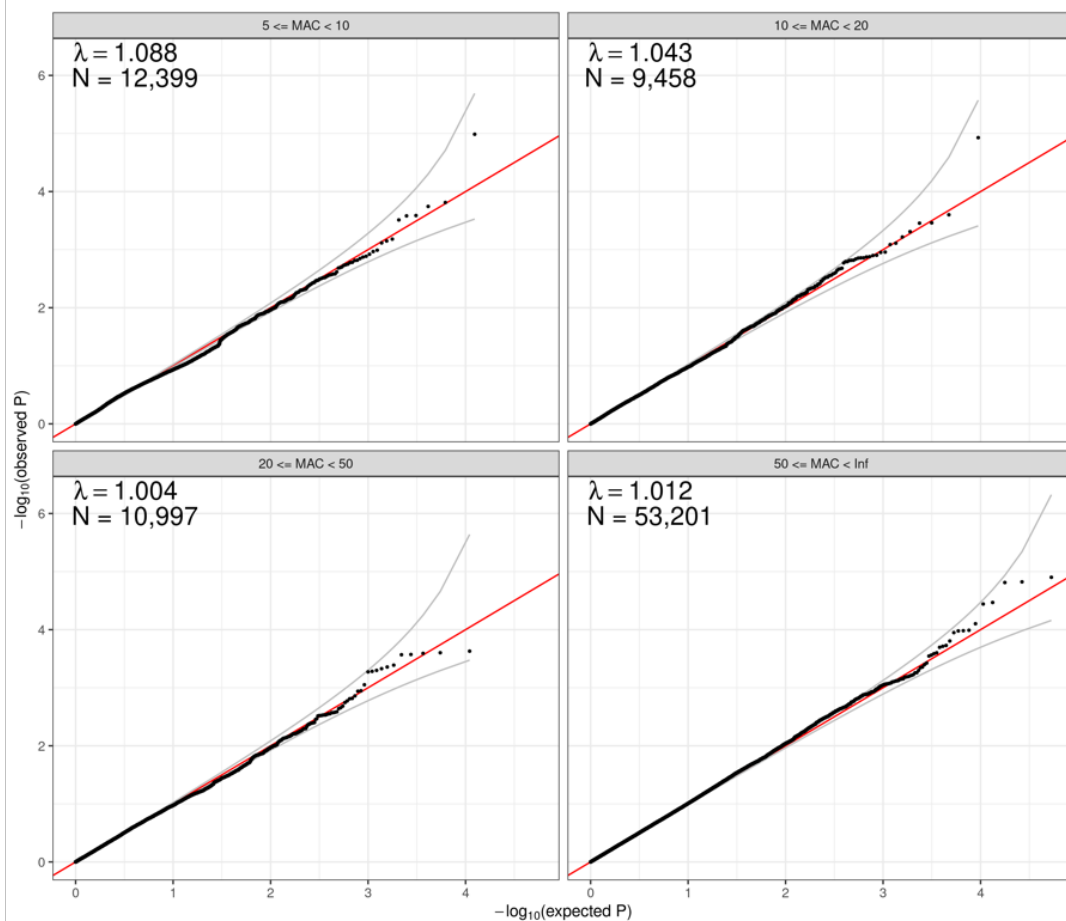

lambda = 1.004

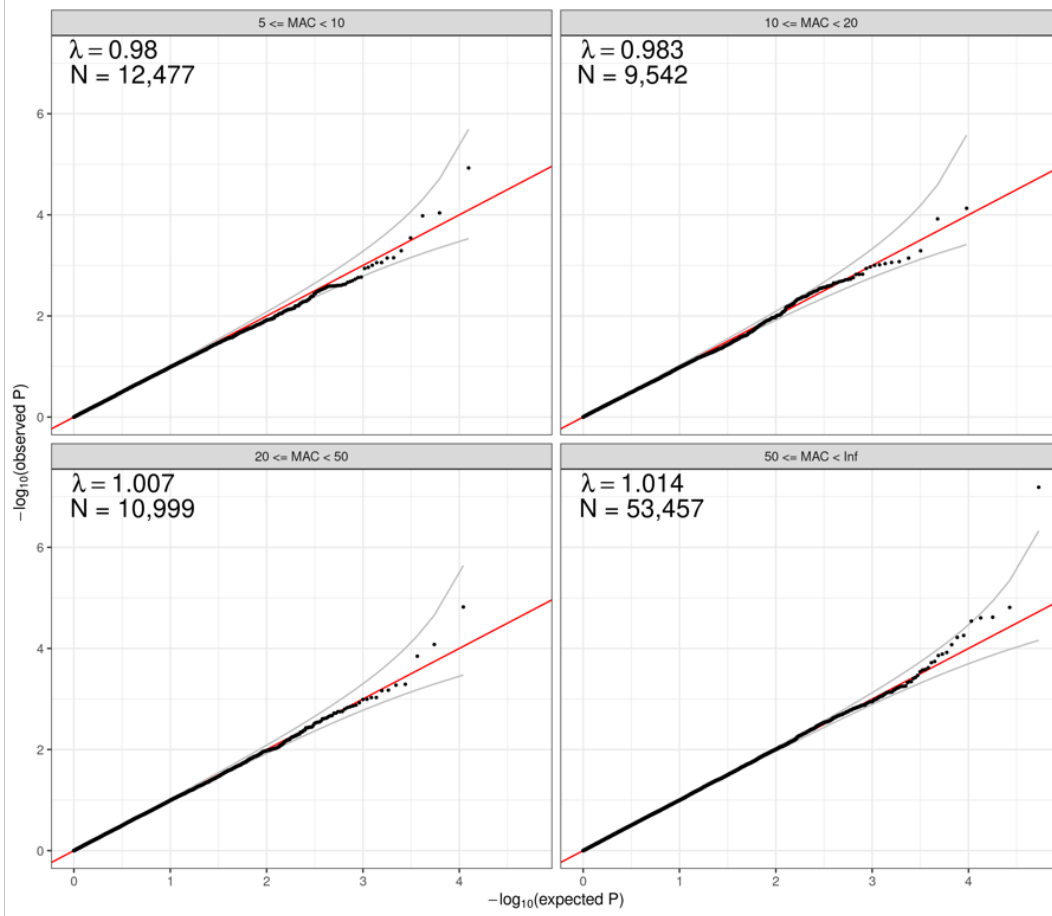

lambda = 1.034

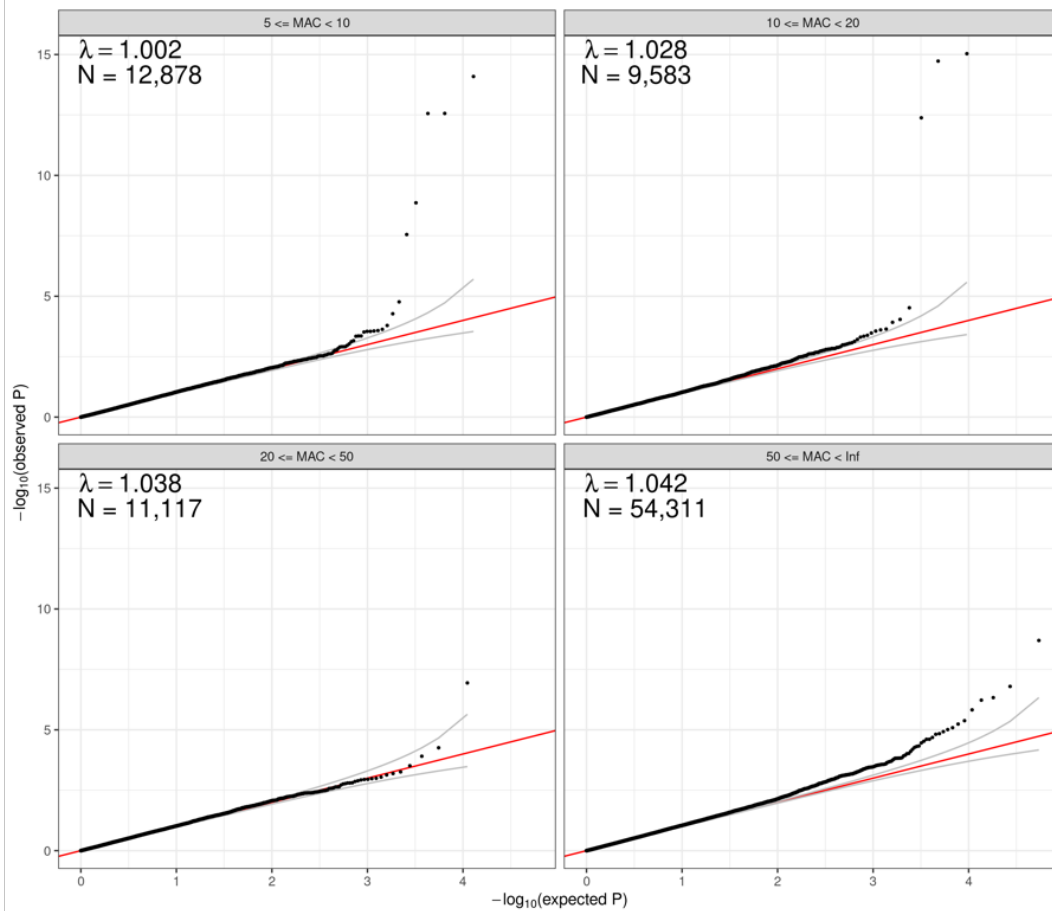

**K**

lambda = 0.9997

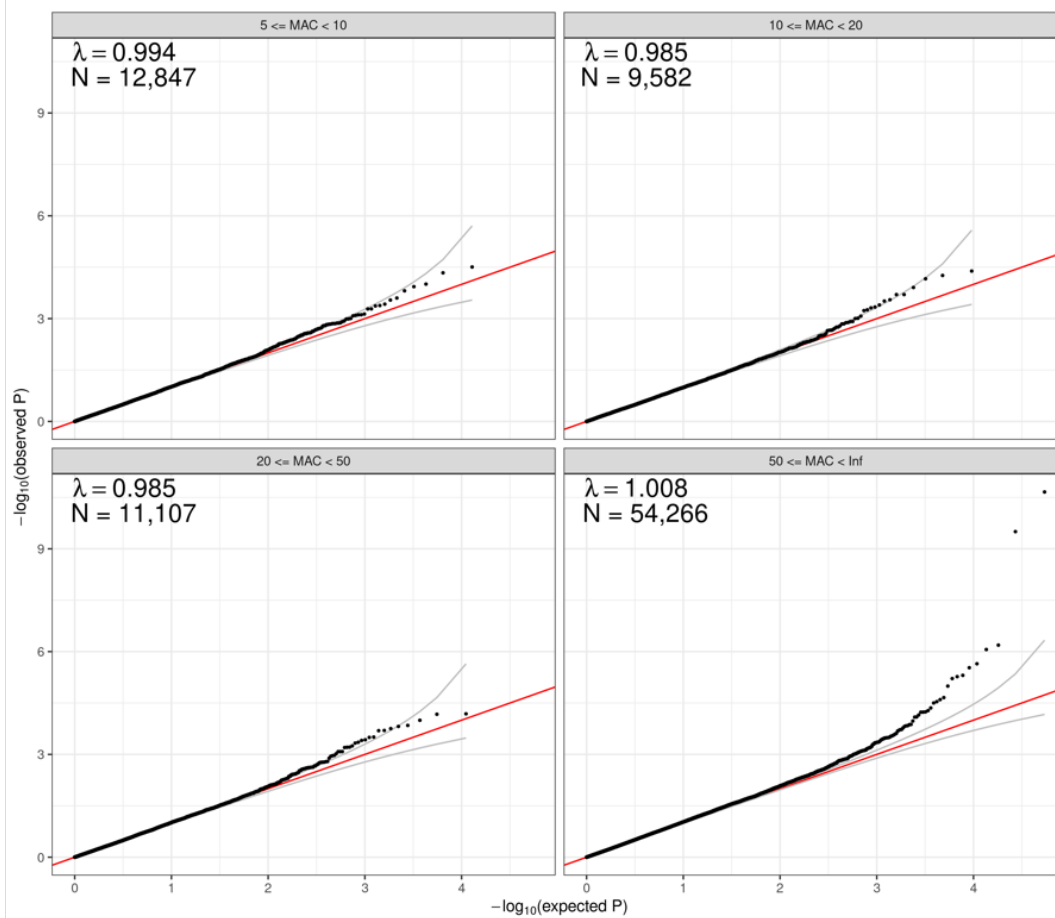

**L**

lambda = 1.007

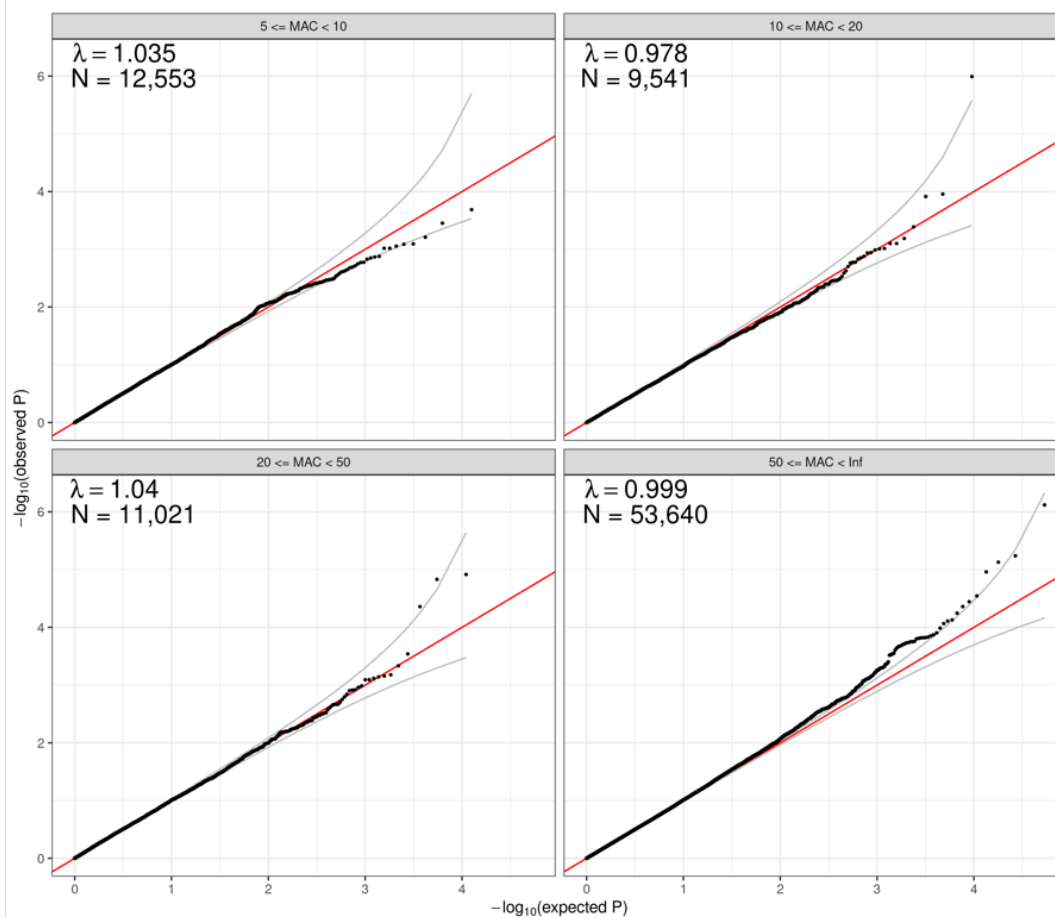

**M** $\lambda = 1.056$ 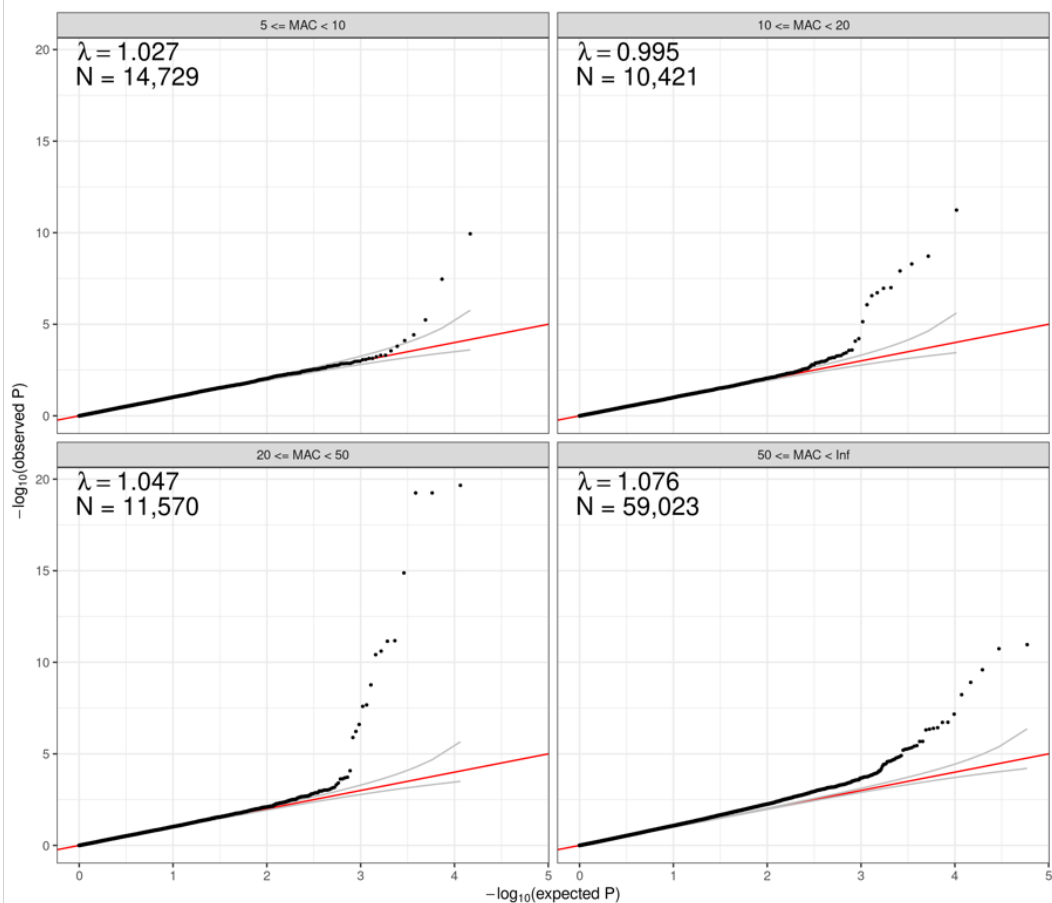**N** $\lambda = 0.9981$ 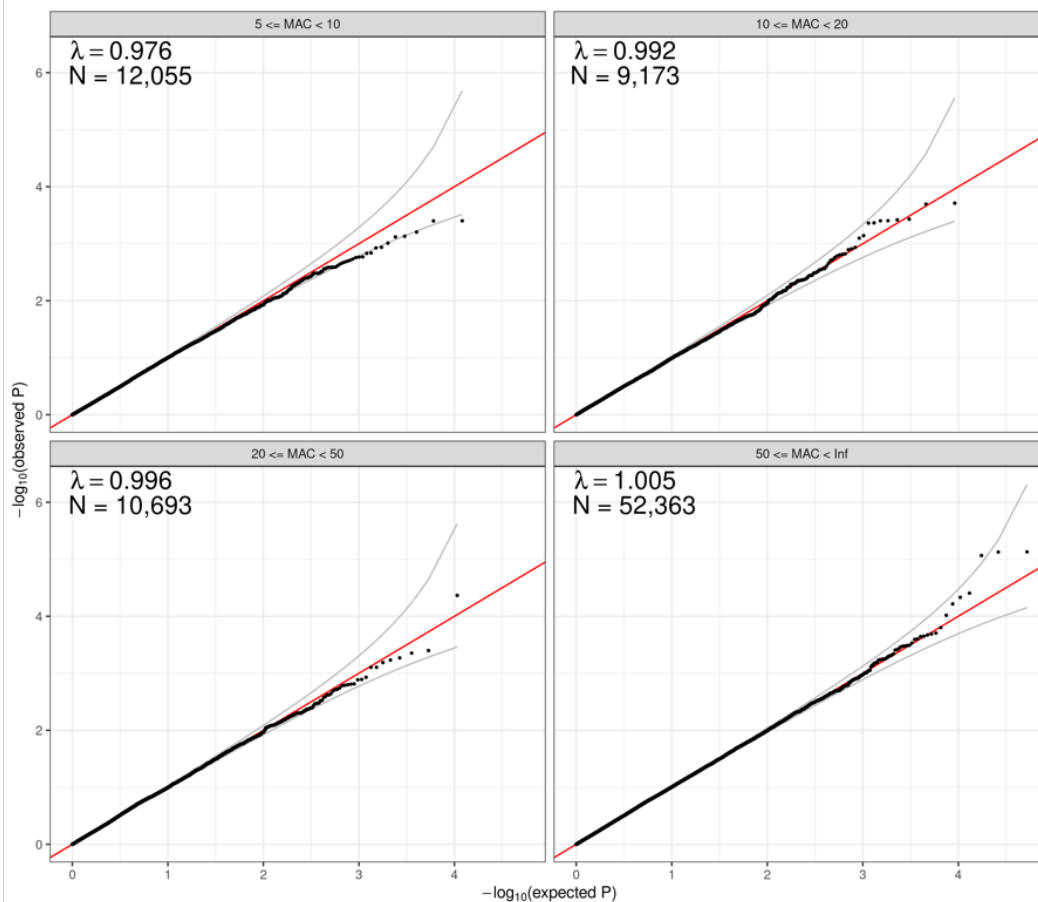

O

lambda = 1.047

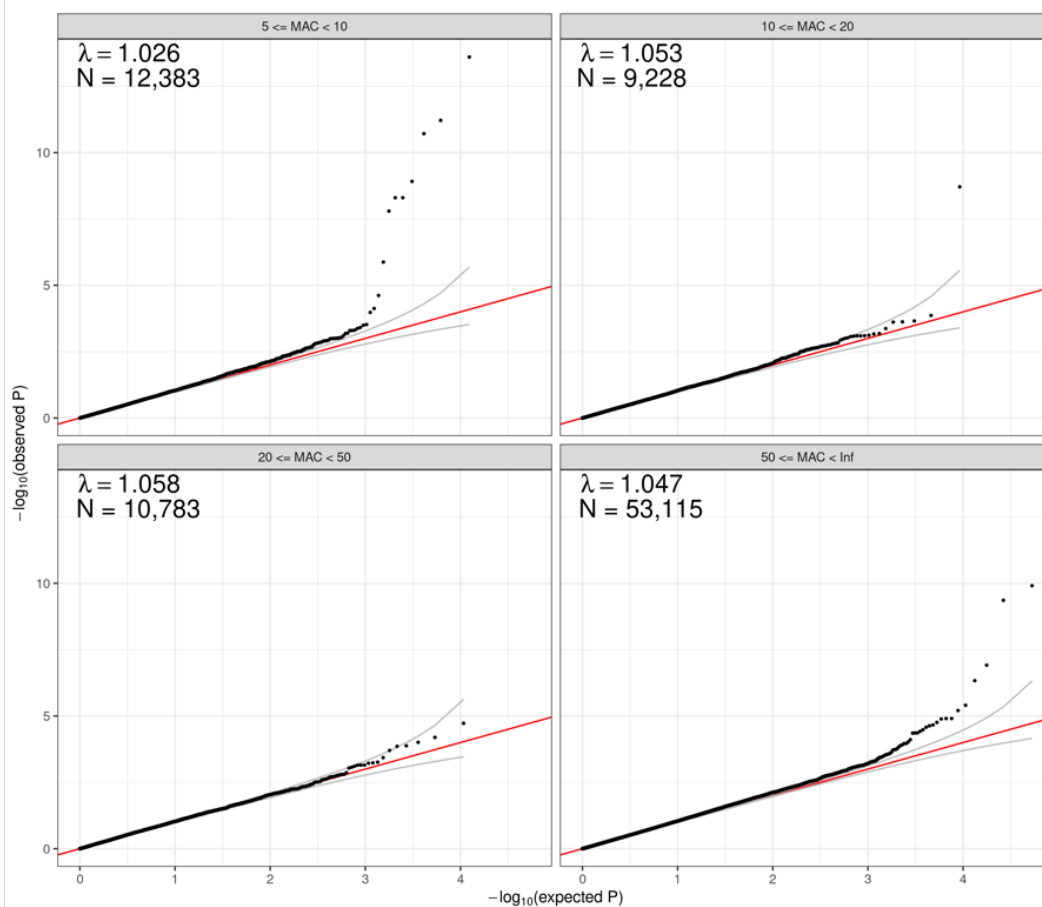

P

lambda = 1.007

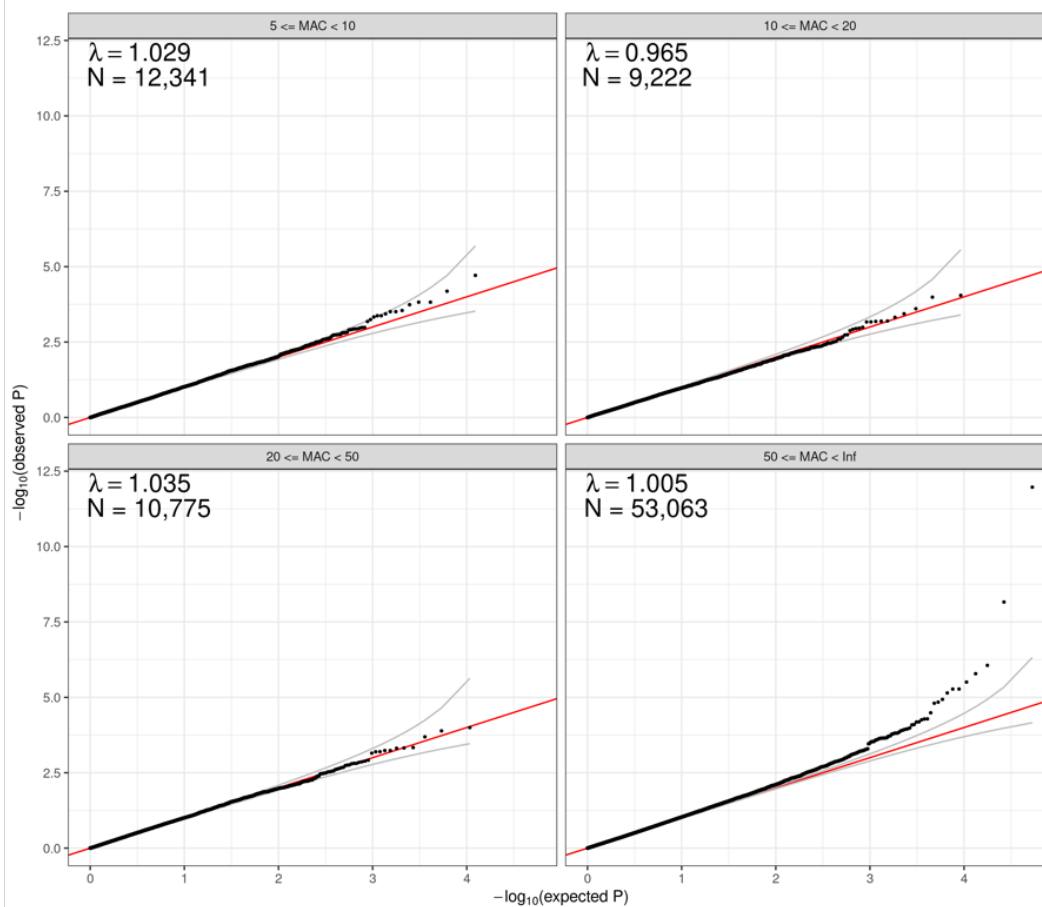

Q

lambda = 1.040

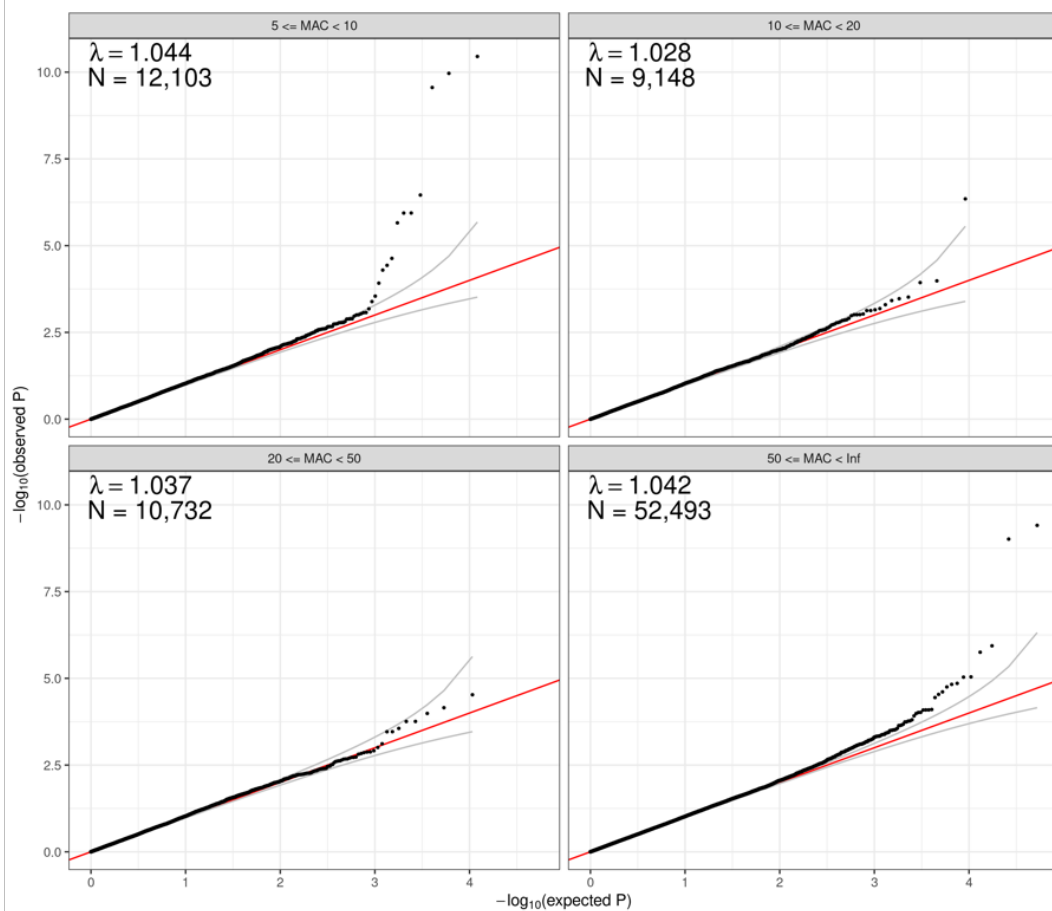

R

lambda = 1.011

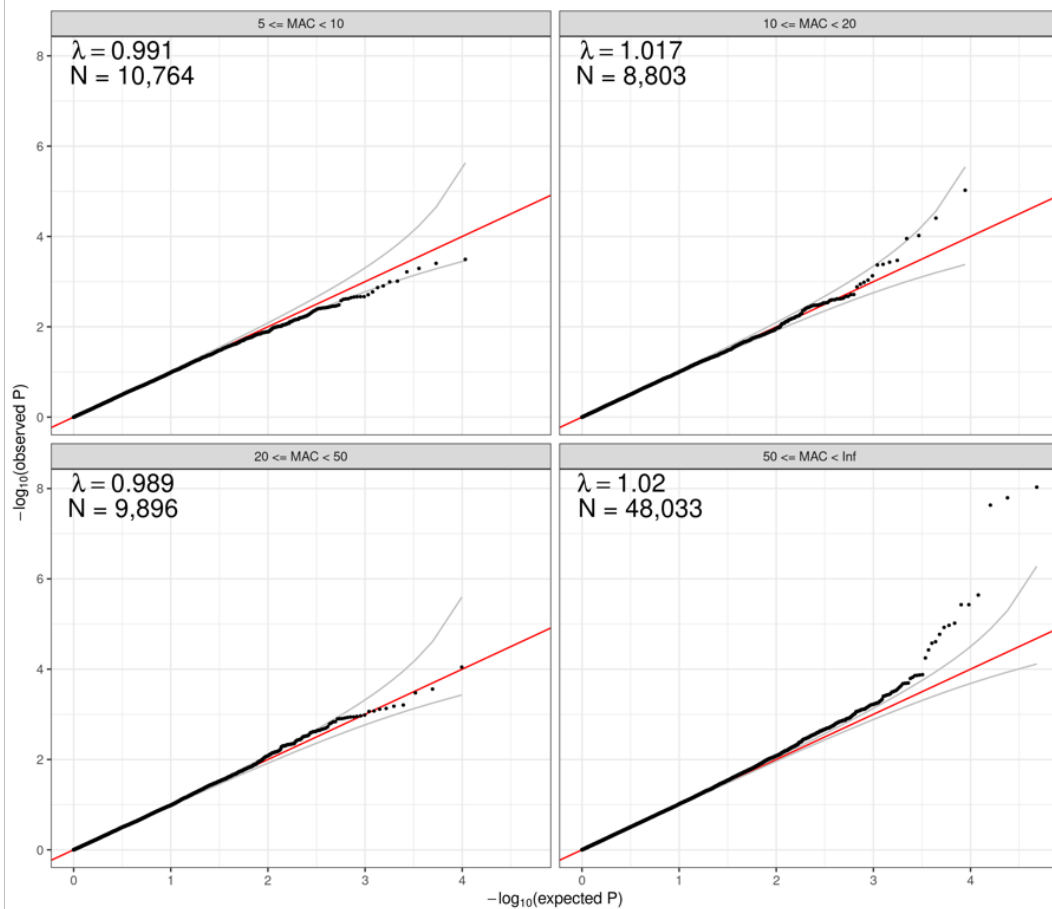

**S** $\lambda = 1.037$ 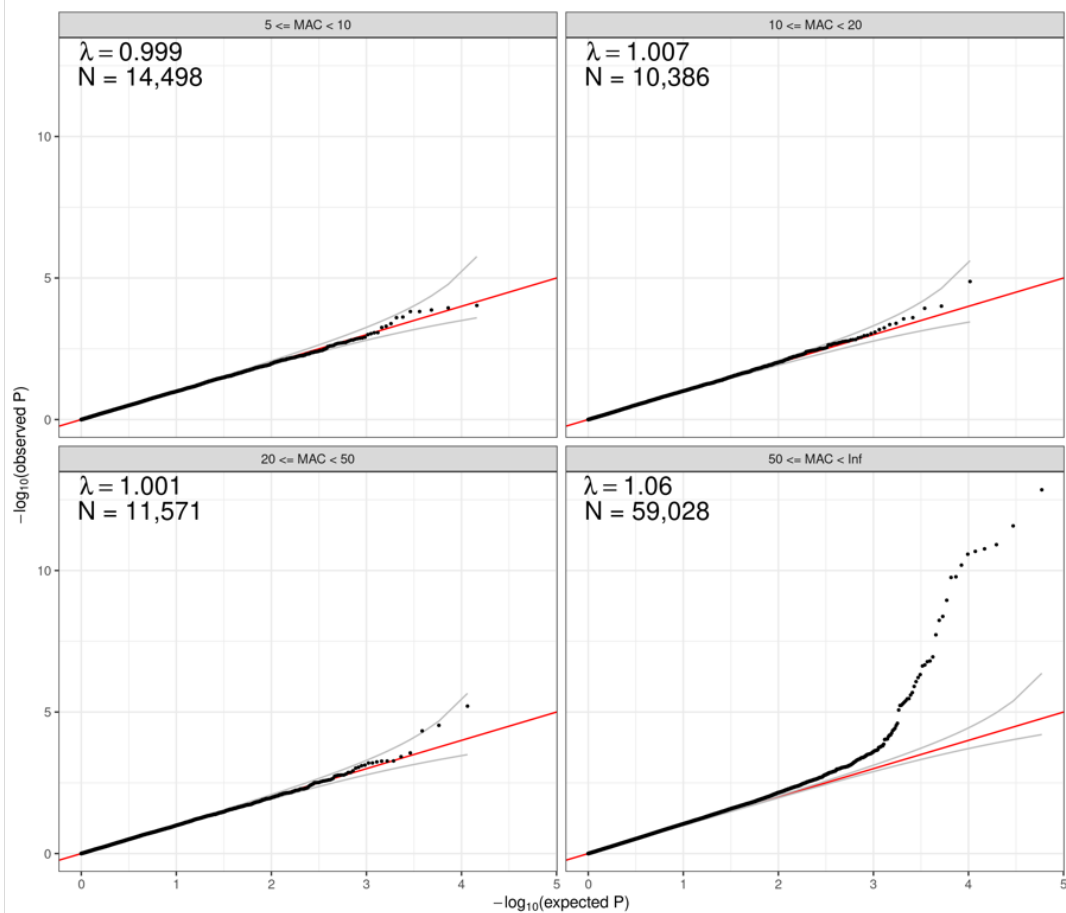**T** $\lambda = 0.996$ 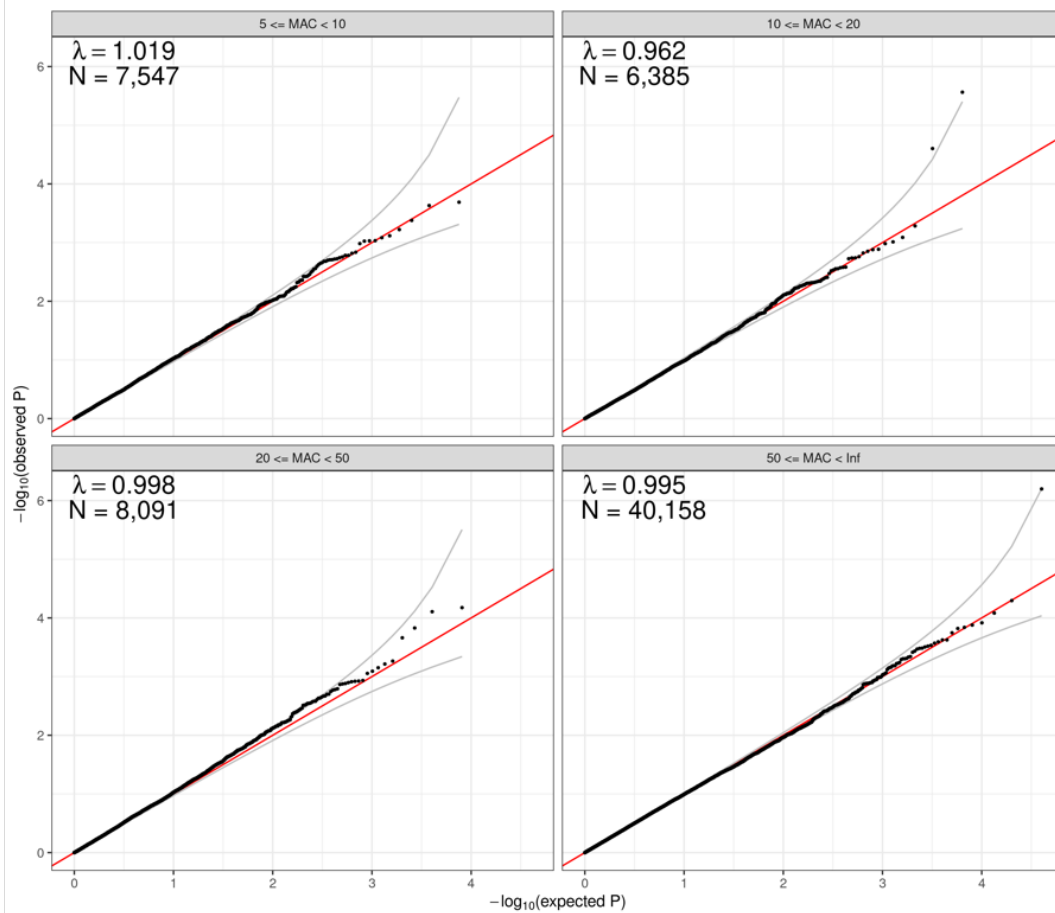

U

lambda = 1.018

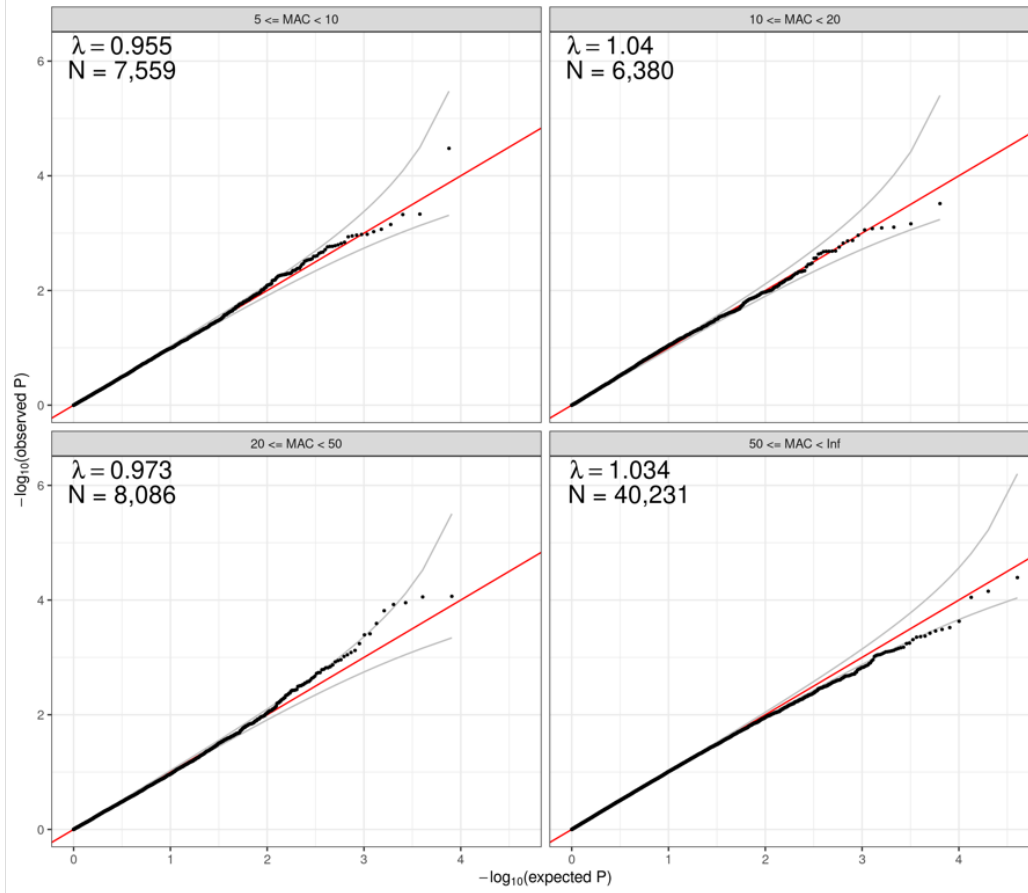

V

lambda = 1.012

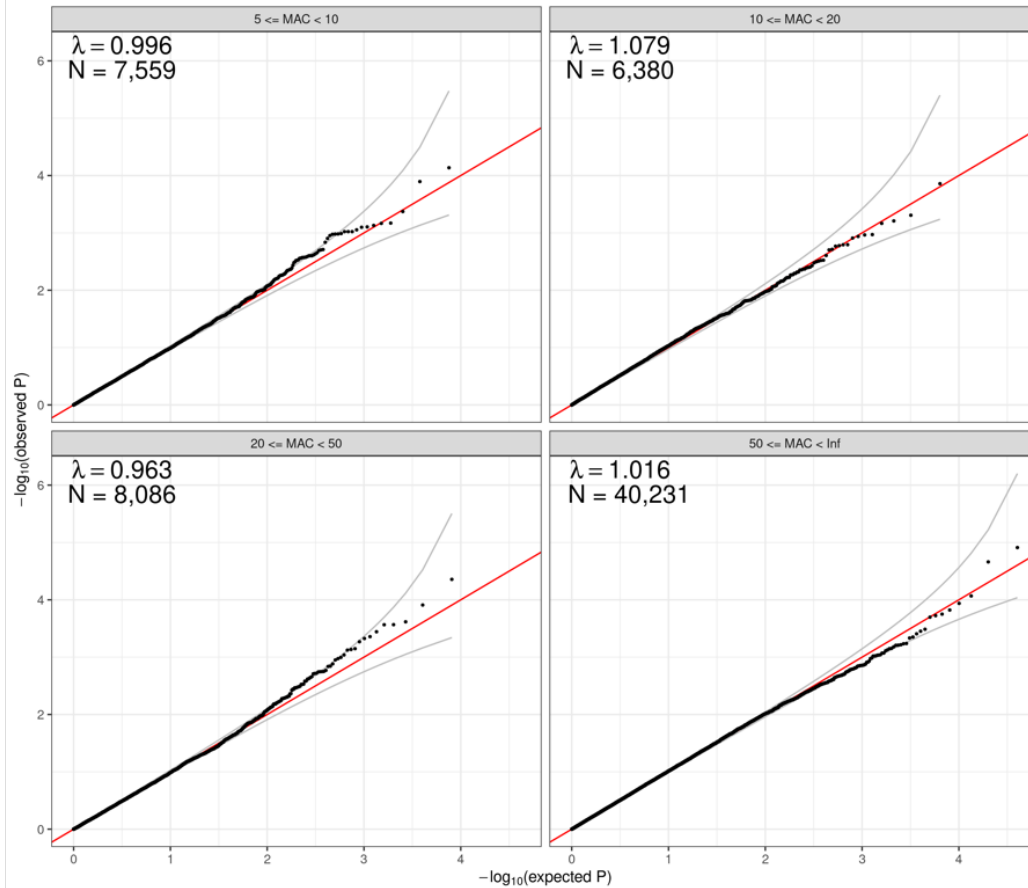

W

lambda = 1.021

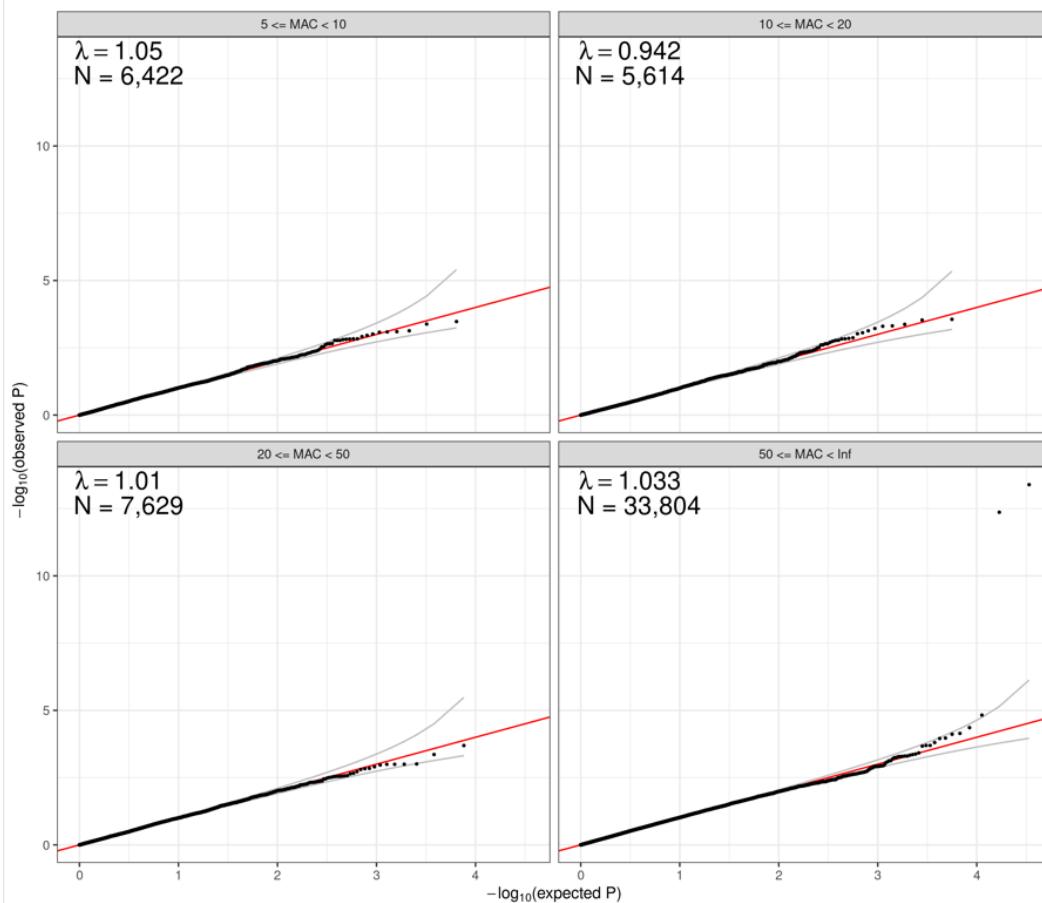

X

lambda = 1.011

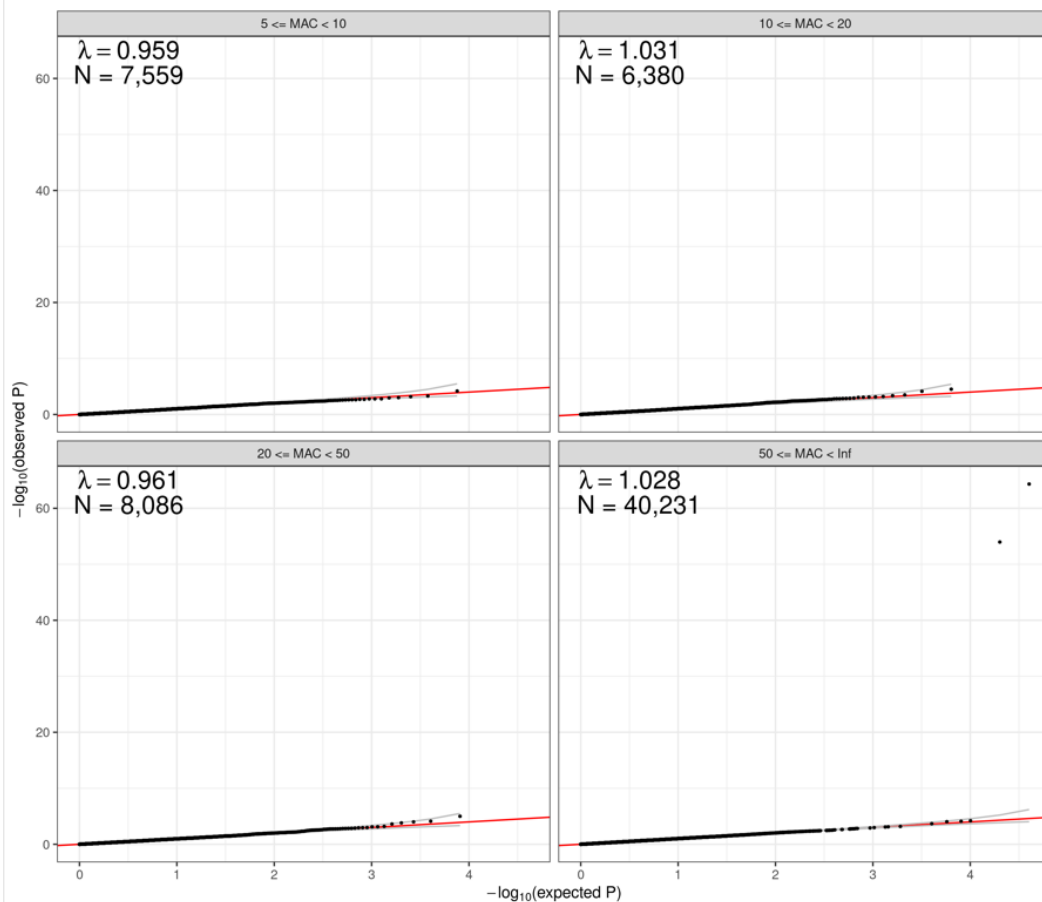

**Figure S3. Manhattan plots of the marginal structural variant analyses in TOPMed.** All p-values are derived from two-sided t-tests and are not adjusted for multiple comparisons. (A) HCT; (B) HGB; (C) MCH; (D) MCHC; (E) MCV; (F) RBC; (G) RDW; (H) BASO\_binary; (I) EOSIN; (J) LYMPHS; (K) MONOS; (L) NEUTRO; (M) WBC; (N) EOSIN%; (O) LYMPHS%; (P) MONOS%; (Q) NEUTRO%; (R) MPV; (S) PLT; (T) FERRITIN; (U) IRON; (V) SAT; (W) UIBC; (X) TIBC.

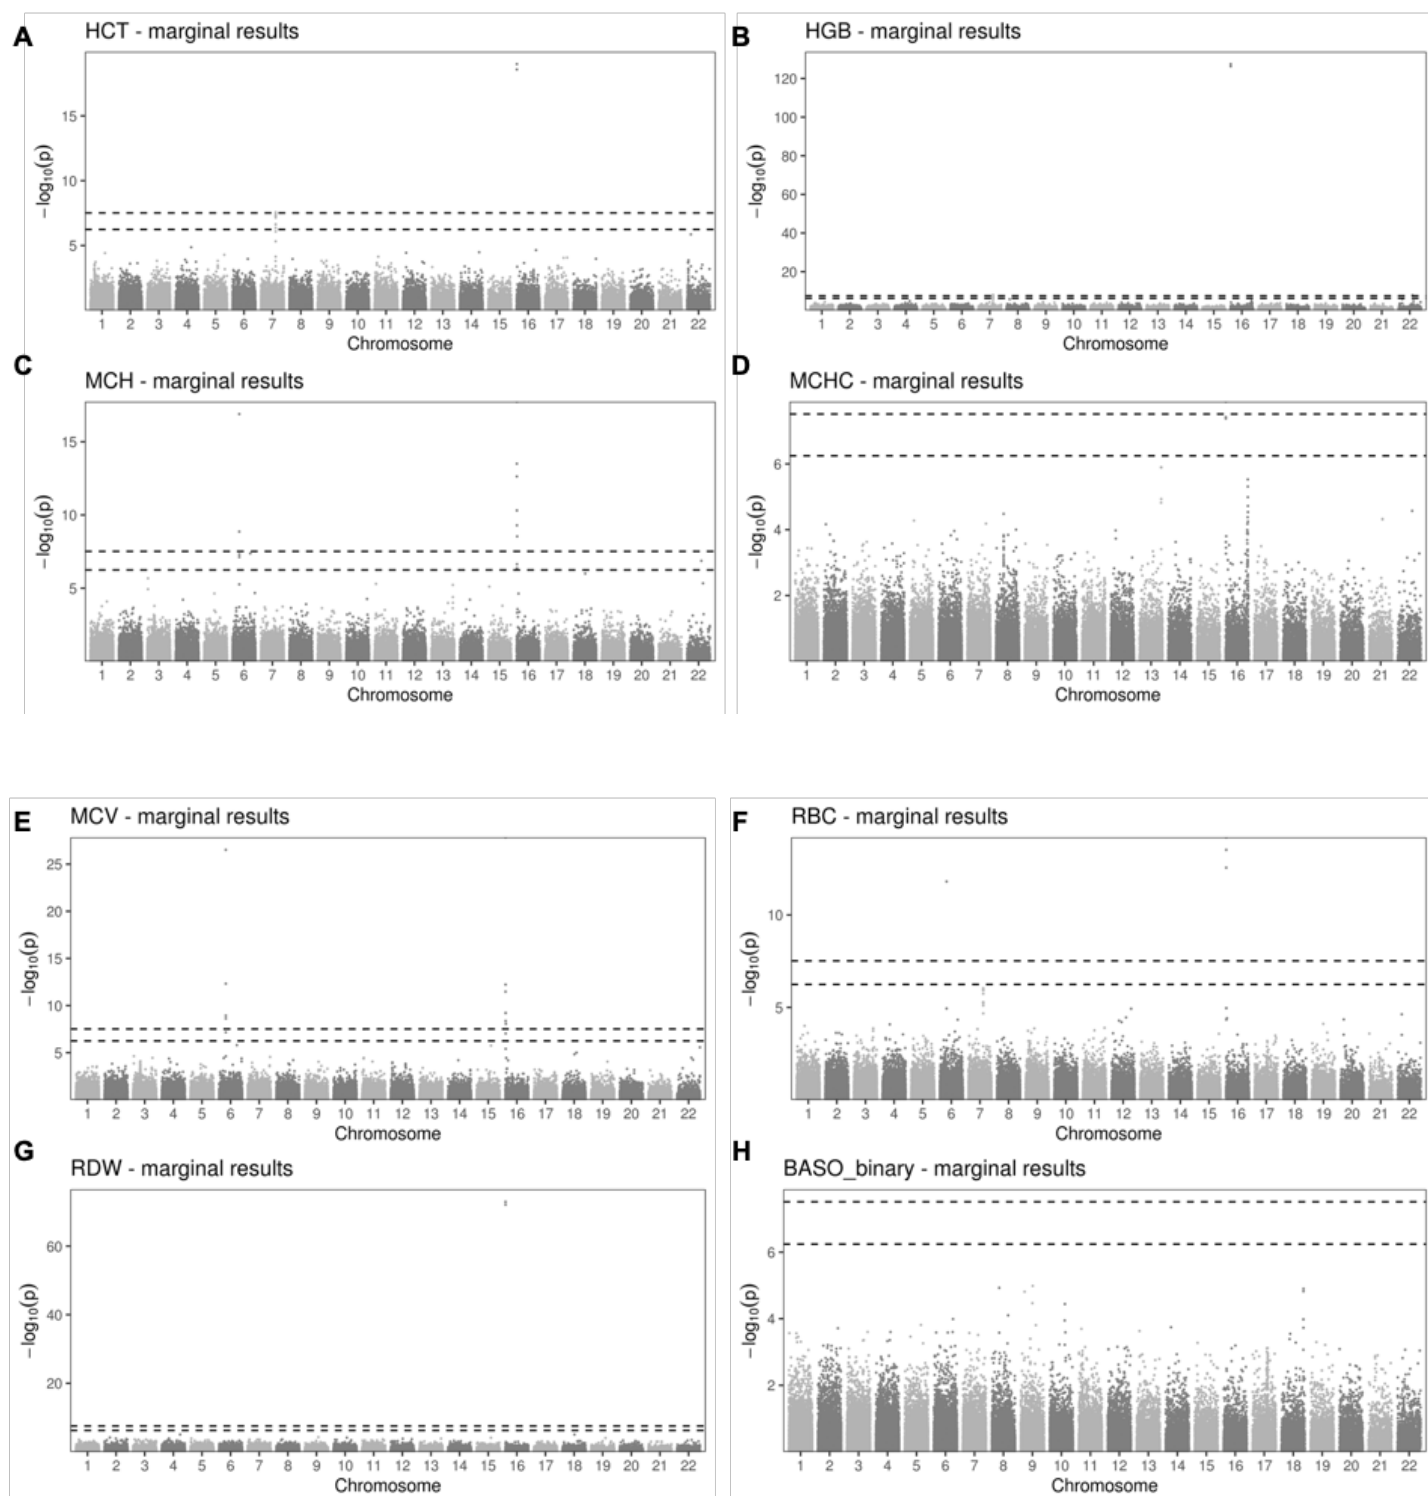

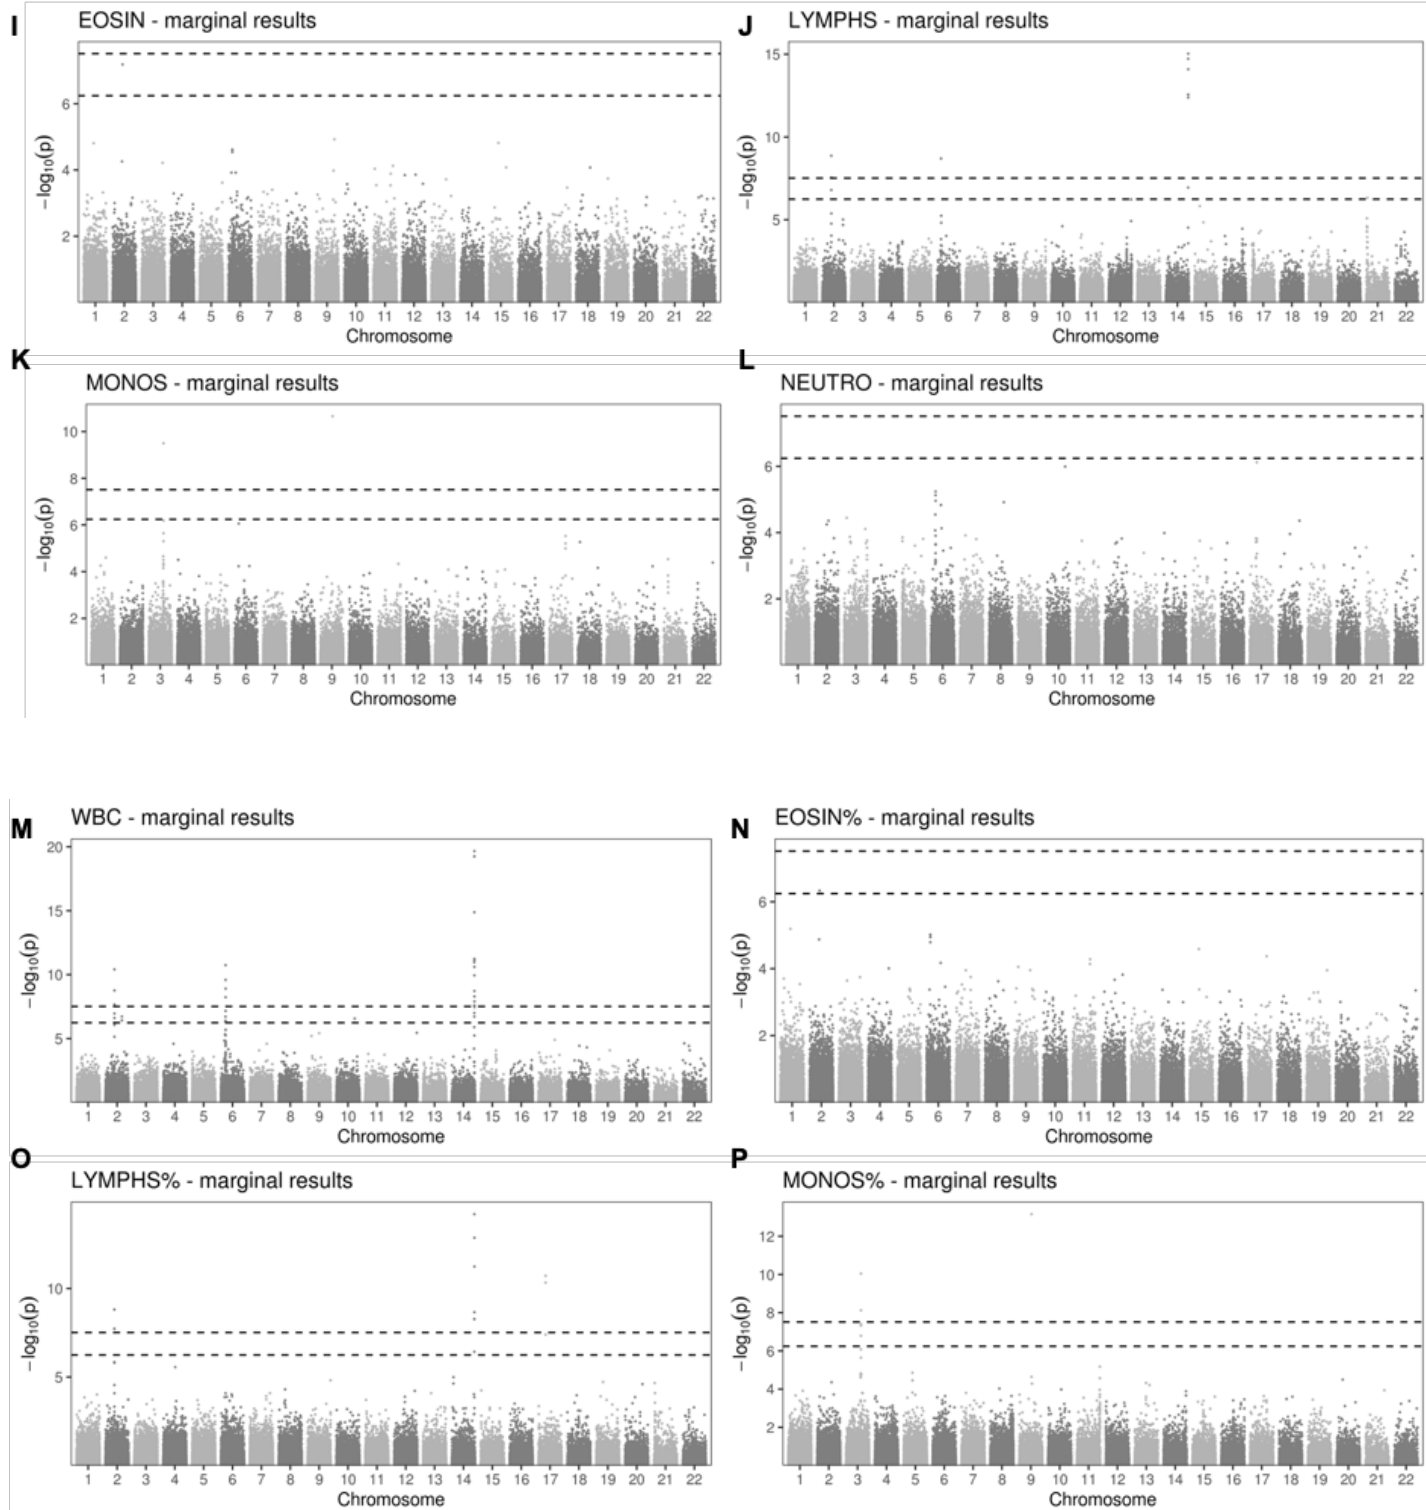

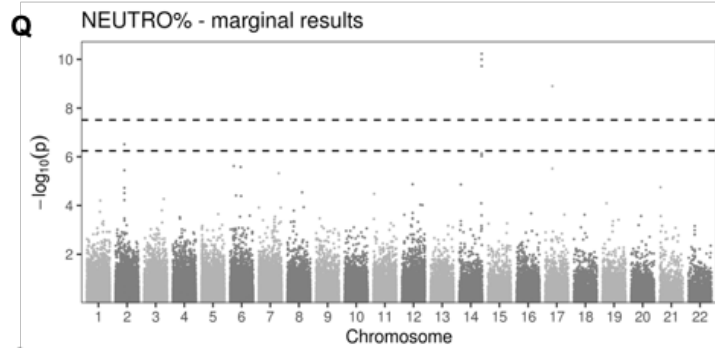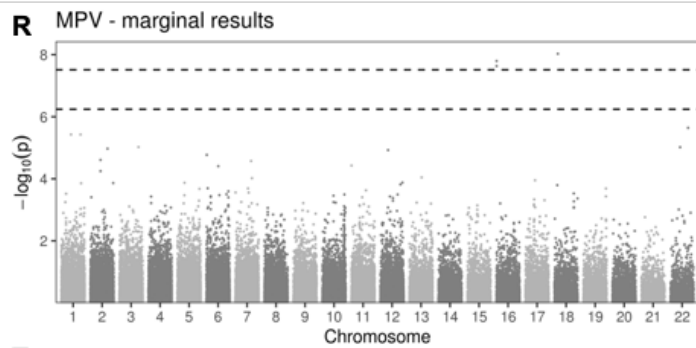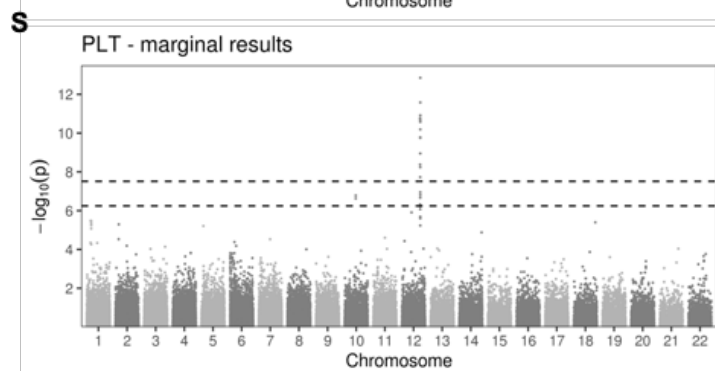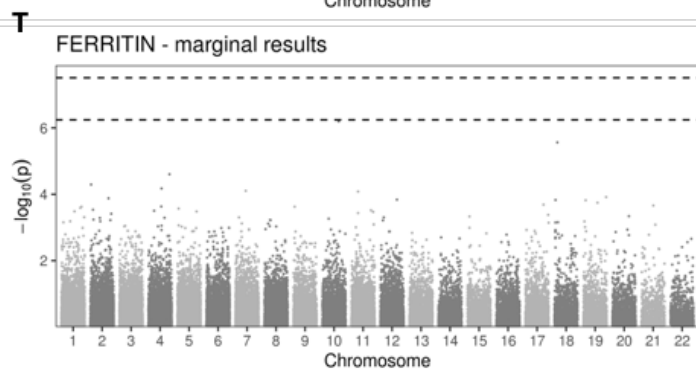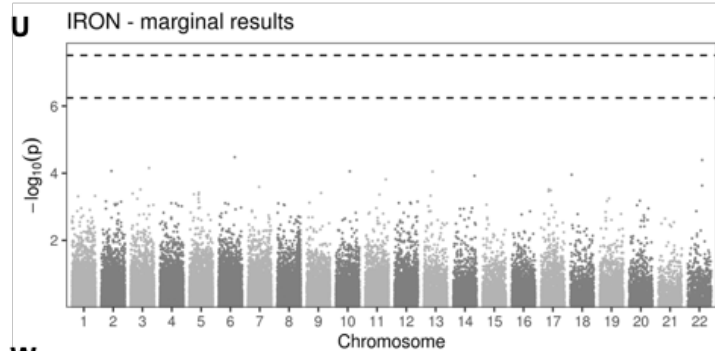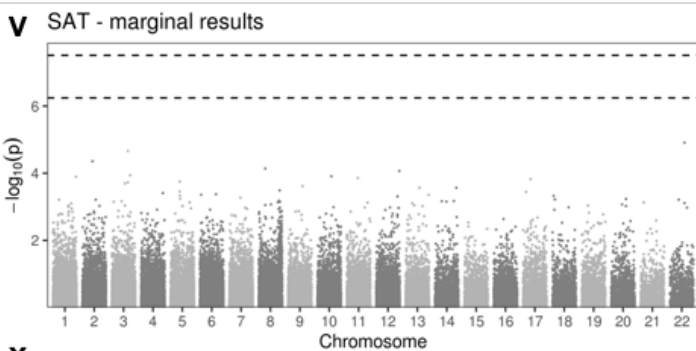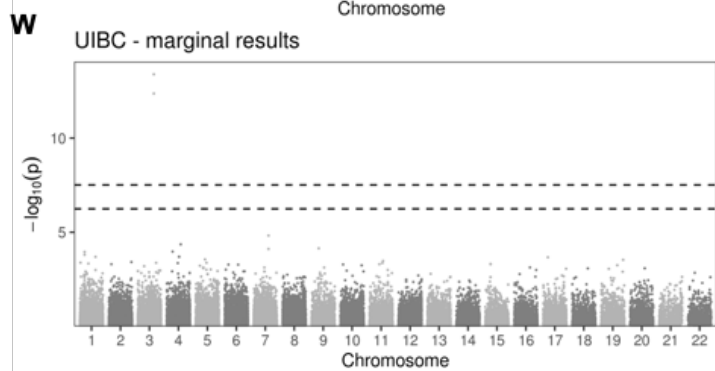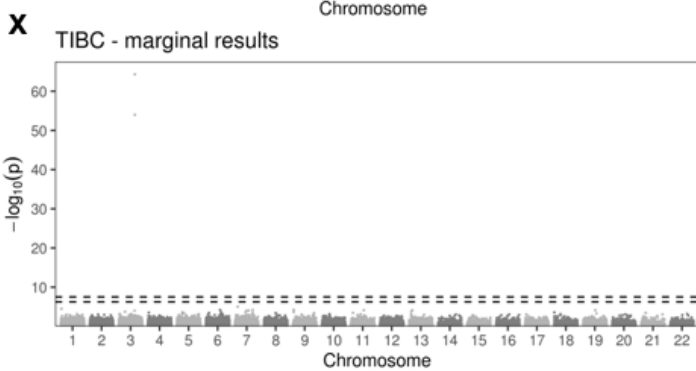

**Figure S4. Locus zoom plots for structural variants significantly associated with hematological and hemostasis traits in TOPMed.** SVs are shown as large circles and SNVs are shown as small circles. All p-values are derived from two-sided t-tests and are not adjusted for multiple comparisons. A) LYMPH, B) LYMPH PROP, C) MONOS, D) MONOS PROP, E) NEUTRO PROP, F) WBC, G) HCT, H) HGB, I) MCH, J) MCHC, K) MCV, L) RBC, M) RDW, N), MPV, O) PLT, P) TIBC, Q) UIBC

**A**

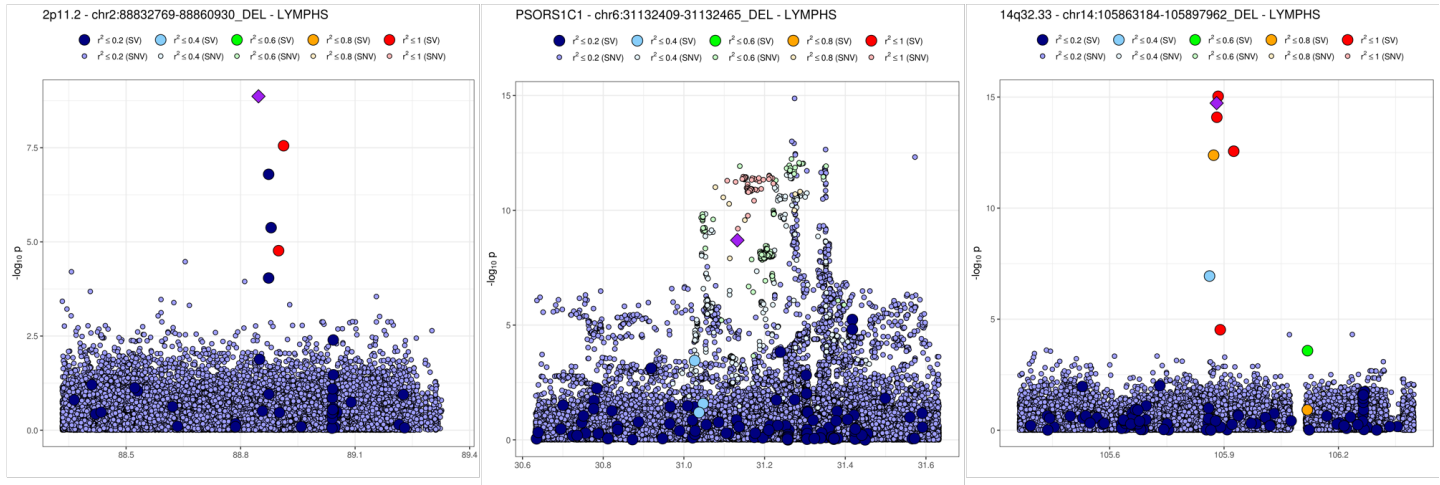

**B**

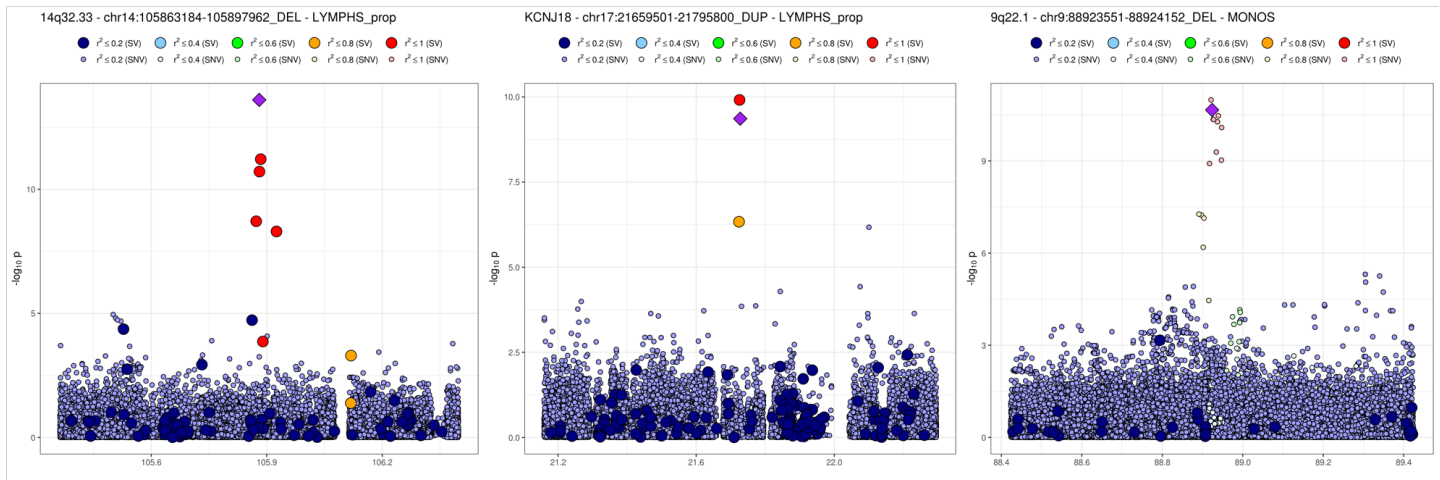

**C**

D

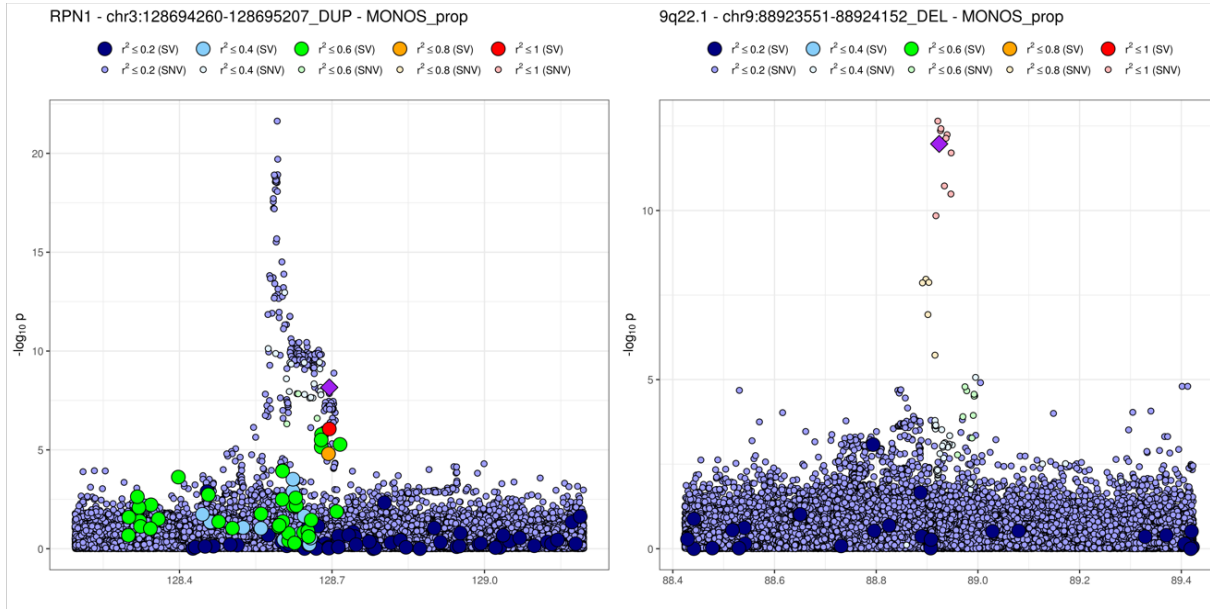

E

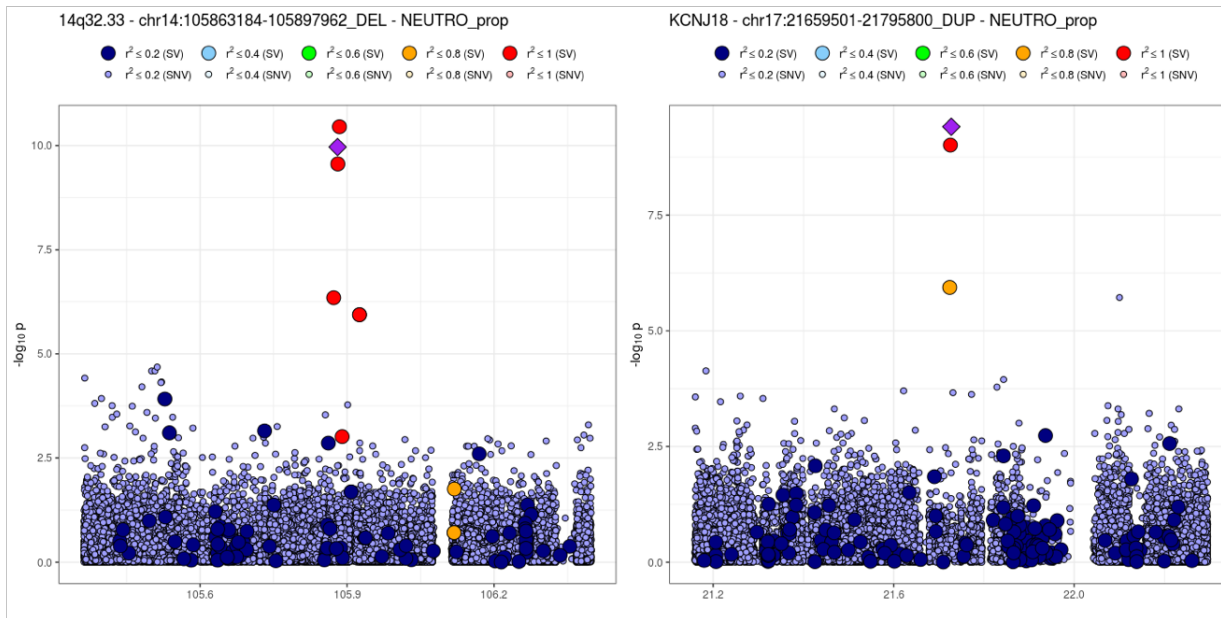

F

2p11.2 - chr2:88832769-88860930\_DEL - WBC

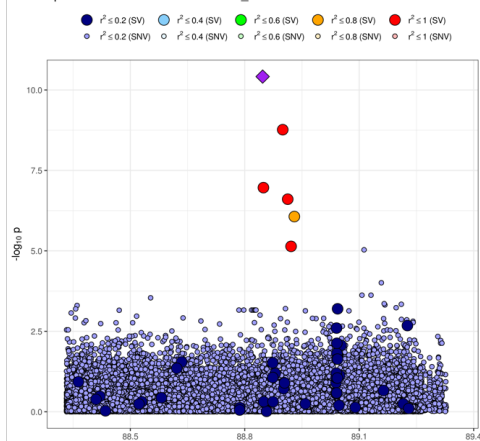

6p21.32 - chr6:32591559-32591660\_DEL - WBC

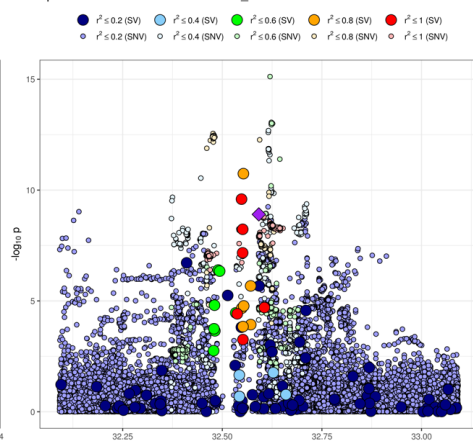

14q32.33 - chr14:105864247-105902650\_DEL - WBC

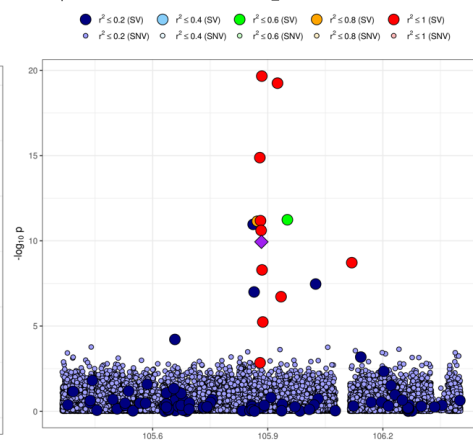

G

HBA1/HBA2/HBQ1 - chr16:172001-177200\_DEL - HCT

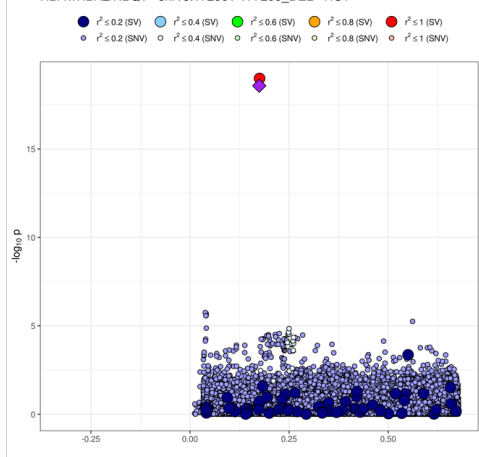

H

HBA1/HBA2/HBQ1 - chr16:172001-177200\_DEL - HGB

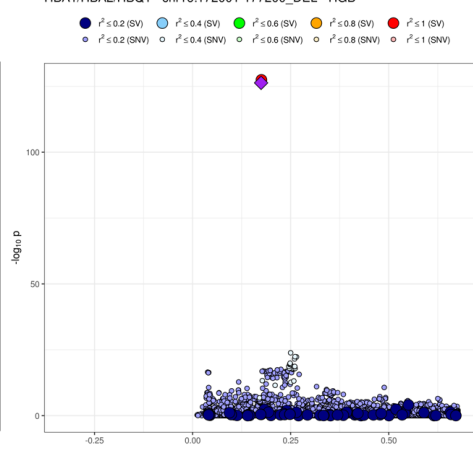

TMPRSS6 - chr22:37067818-37067888\_DUP - HGB

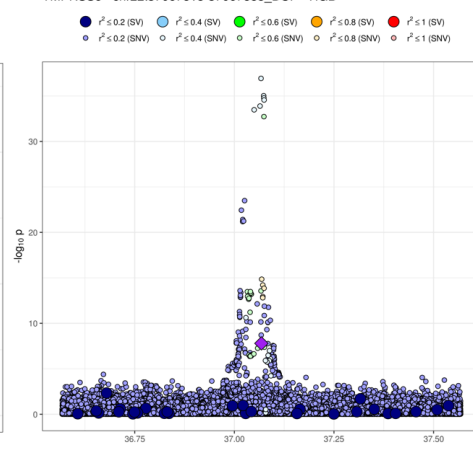

I

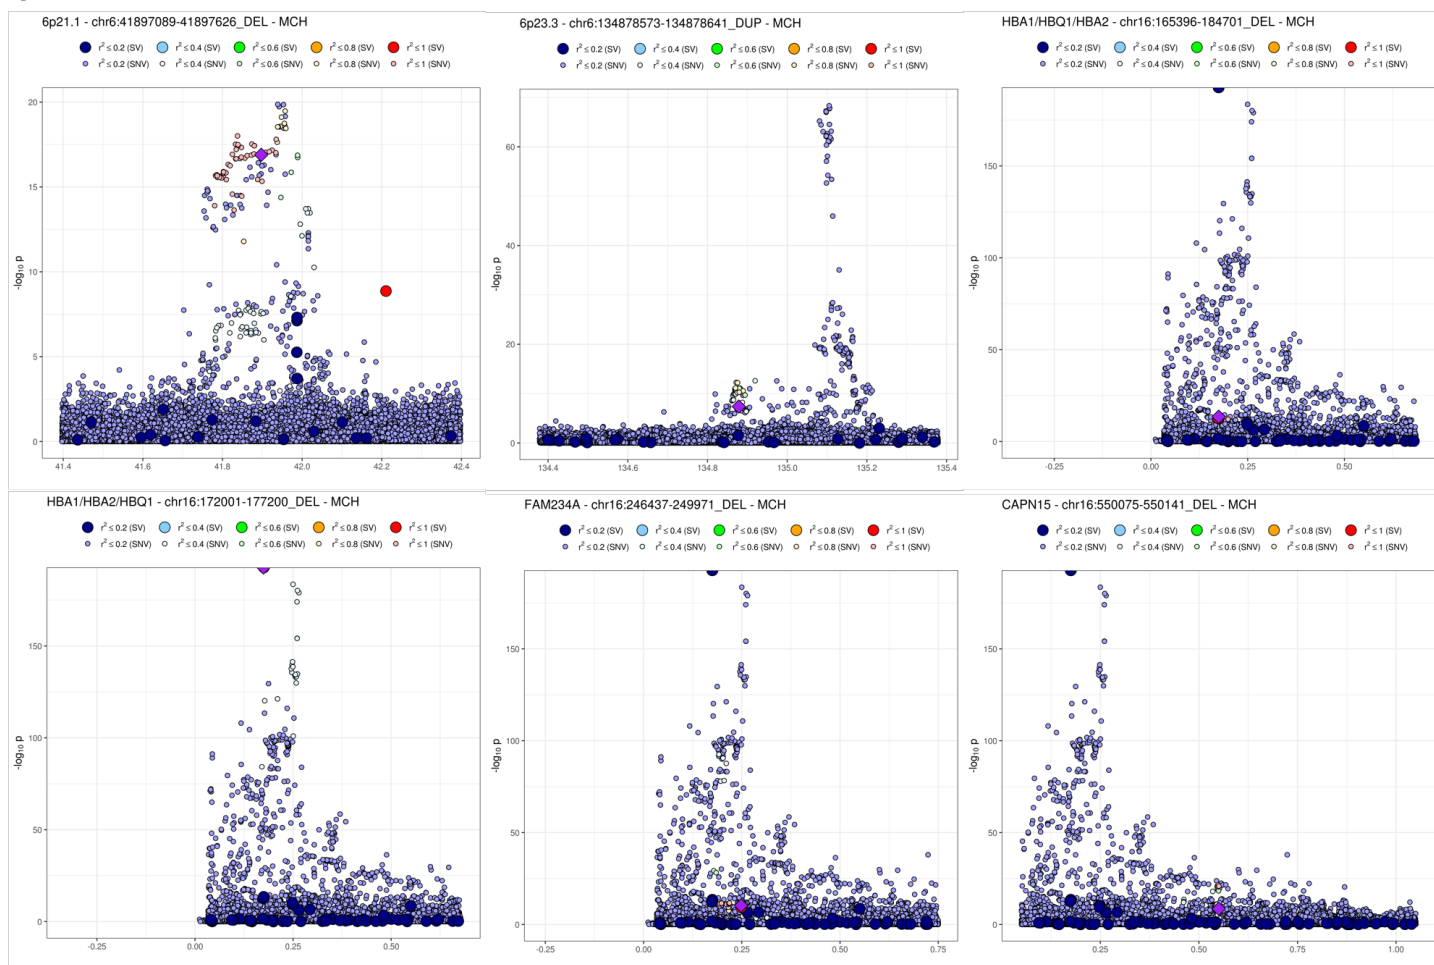

J

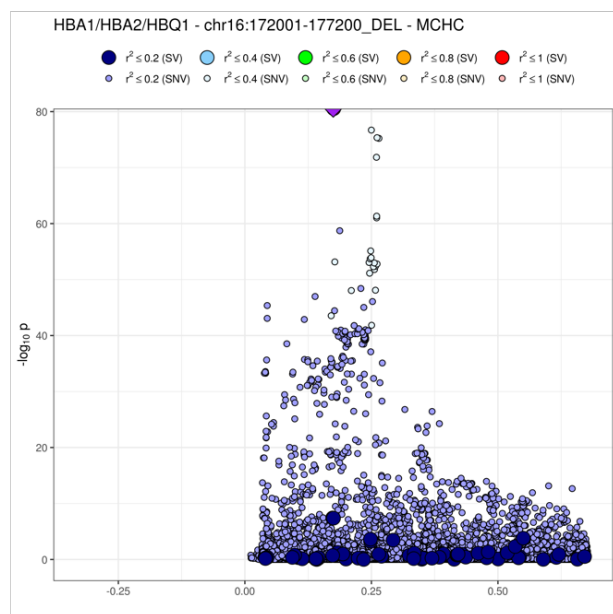

K

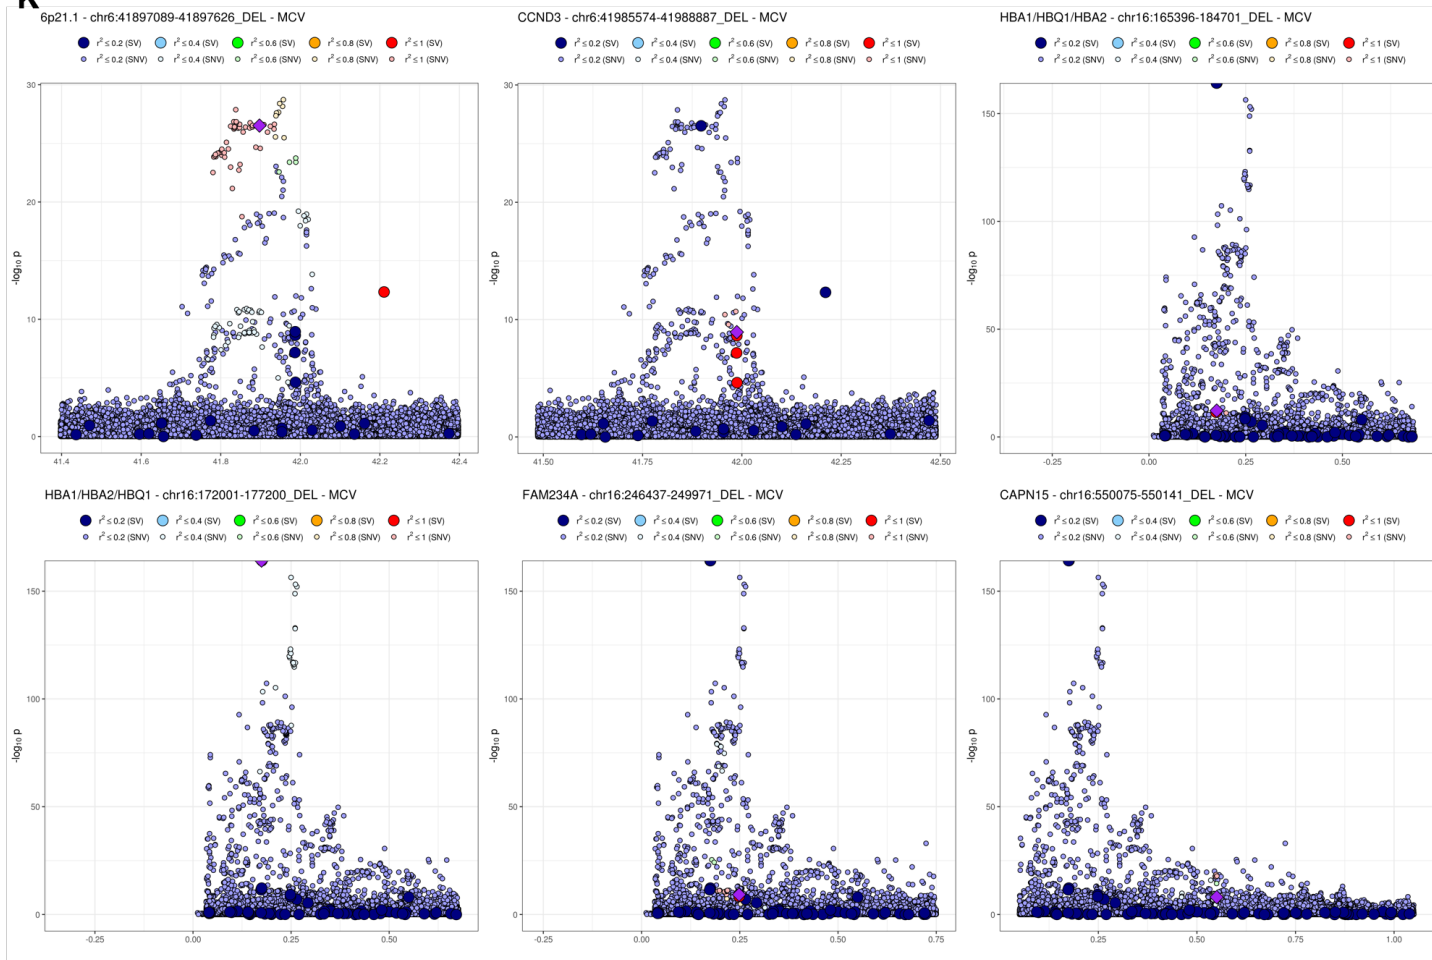

L

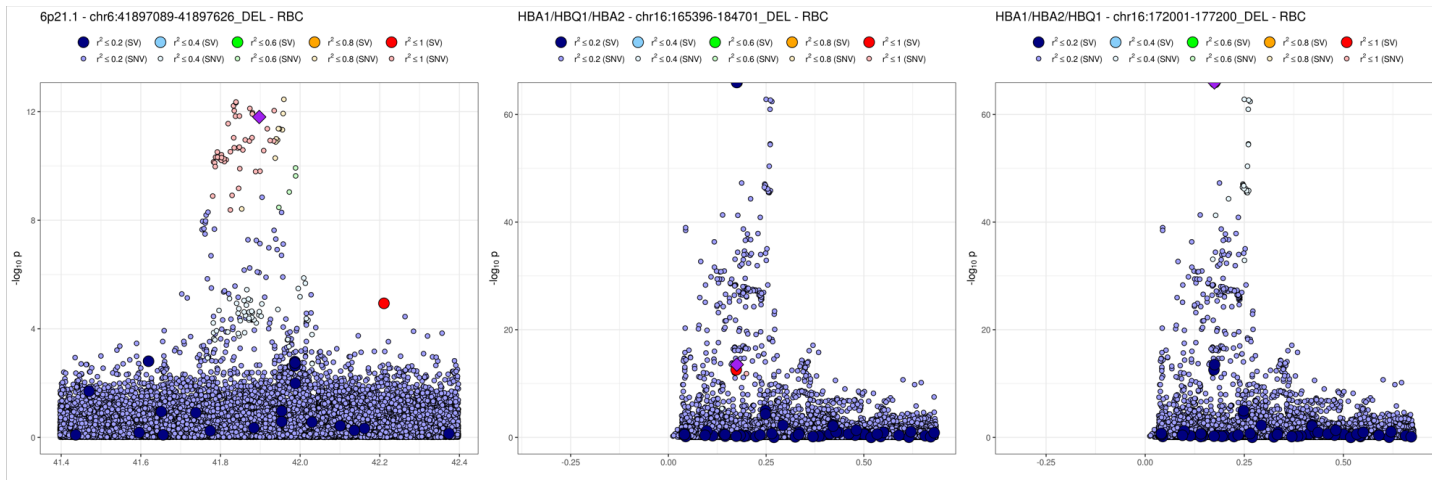

M

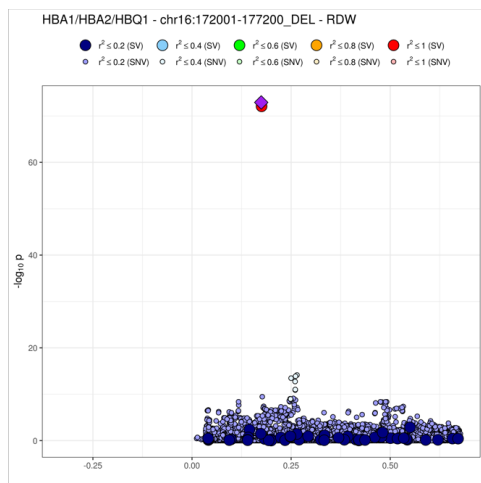

N

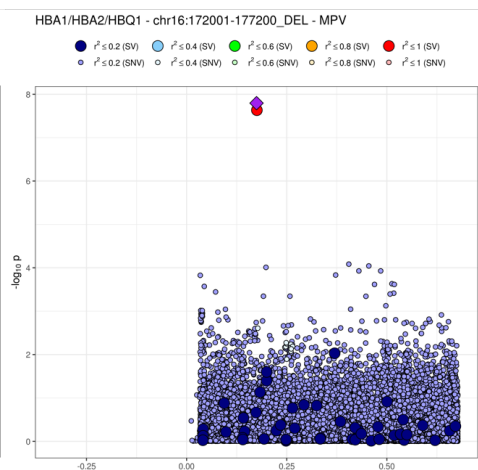

18p11.22 - chr18:9621931-9622237\_DEL - MPV

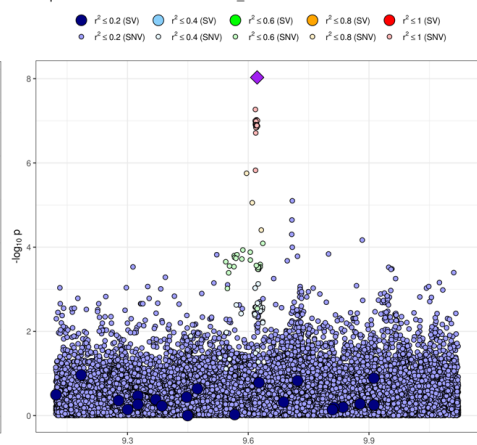

O

ATXN2 - chr12:111538485-111542205\_DEL - PLT

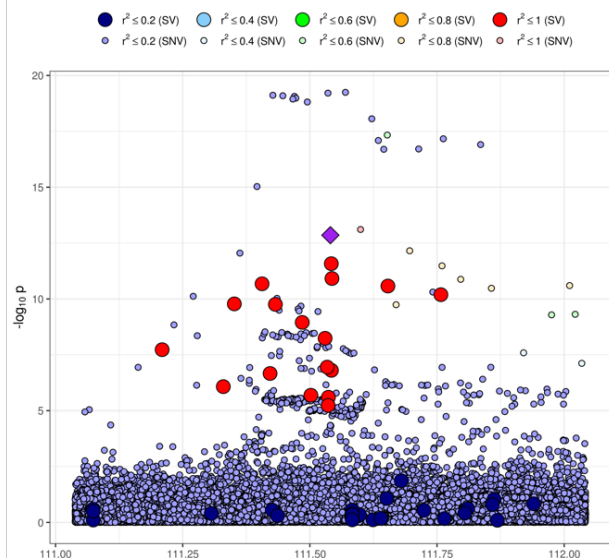

ATXN2 - chr12:111542097-111542205\_INV - PLT

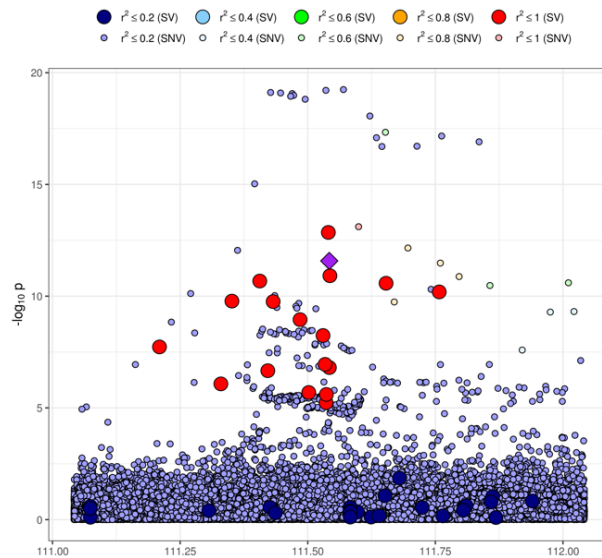

P

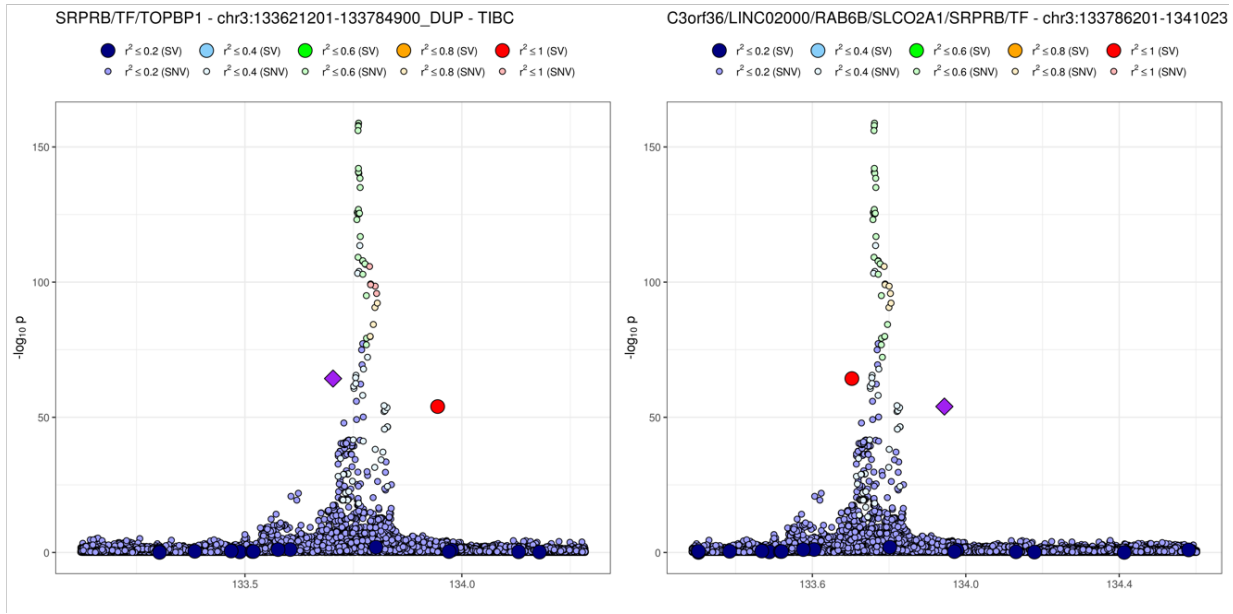

Q

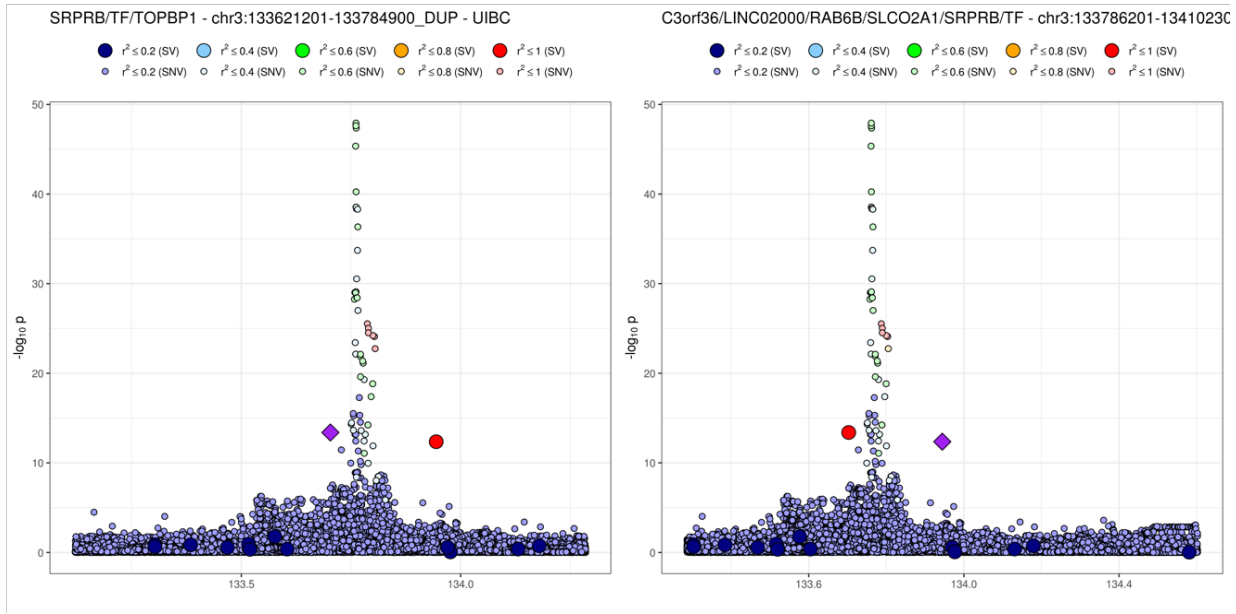

**Figure S5. Visualization of WGS reads in single representative samples for conditionally-independent trait associated SVs.** Panels show WGS read visualization for a single representative sample predicted by Parliament 2 to exhibit an SV event in the A) 16p13.3 (alpha-globin) locus, B) 17p11.2 (KCNJ18) locus, C) 2p11.2 locus and D) 14q32.33 locus. Note WGS reads were visualized using SAMPLOT and display coverage and paired-end read evidence supporting SV events.

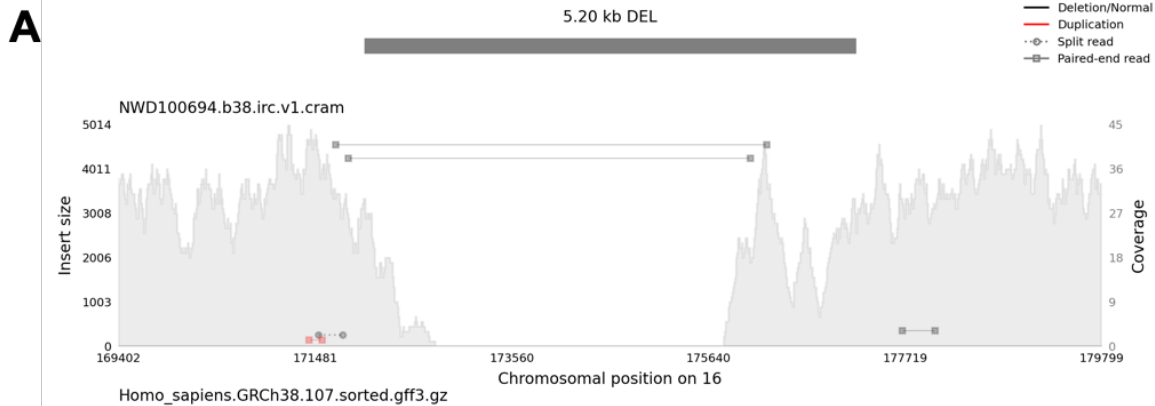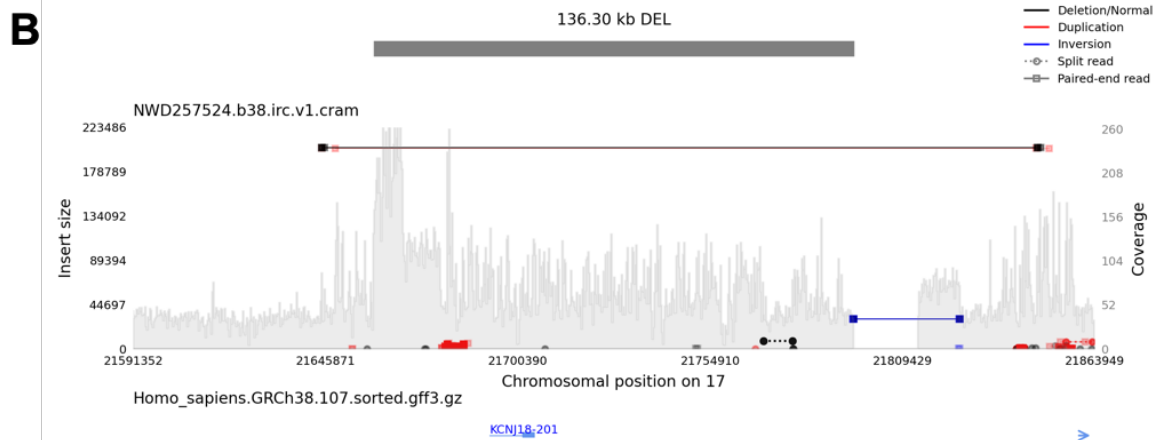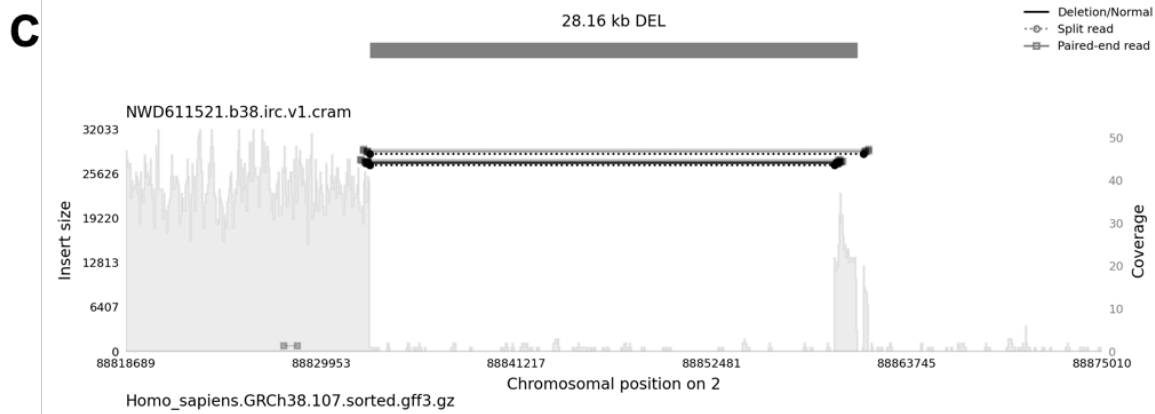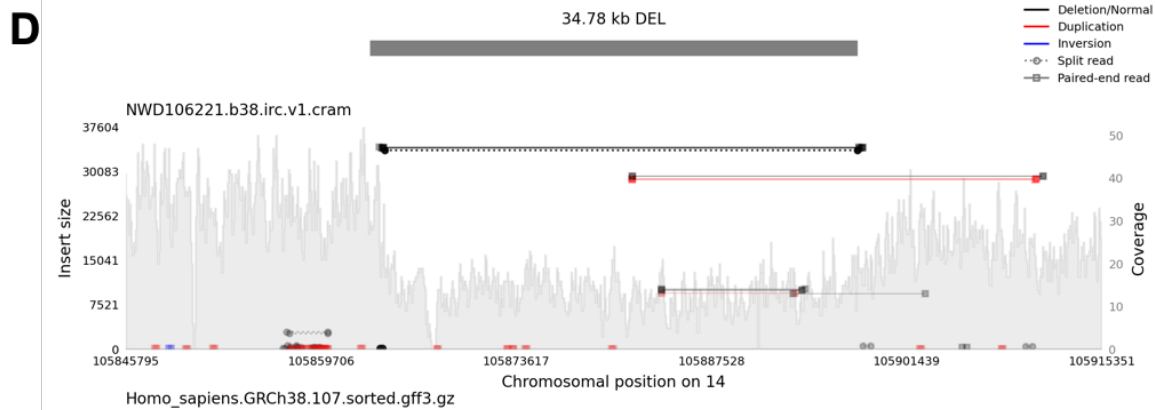

**Figure S6. Comparison of trait-association SV and SNV p-values in TOPMed for previously-reported SNVs from a European ancestry sample set<sup>10</sup>.** The x-axis shows the p-values for the SNV in the TOPMed sample, and the y-axis shows the p-value for the SV that tags that SNV in the TOPMed sample (y axis). Only SNVs with an SV in LD at  $r^2 > 0.8$  are shown. Points with  $p < 1e-4$  in either analysis are labeled with the trait. All p-values are derived from two-sided t-tests and are not adjusted for multiple comparisons.

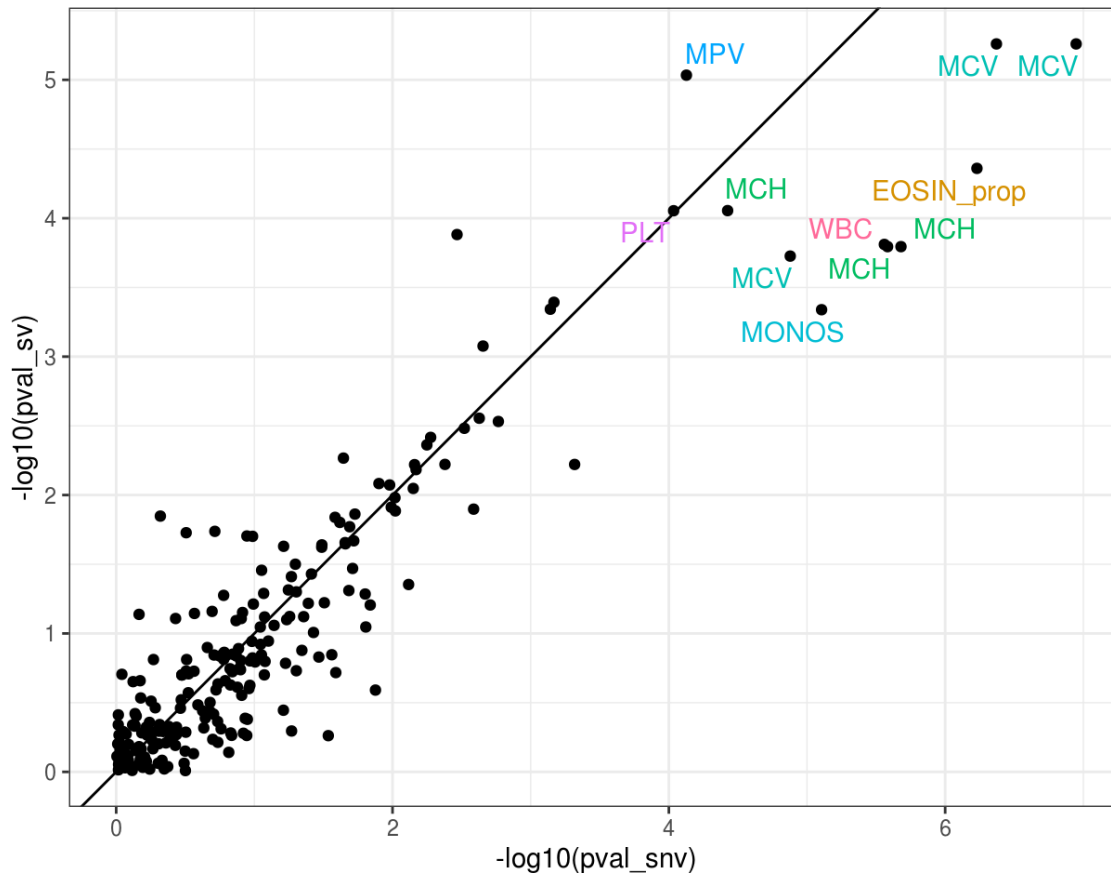

**Figure S7. Chromatin status and chromatin conformation across the 9q22.1 locus (Related to Figure 1).**

(A) Distribution of accessible chromatin (by DNase I sequencing) and histone modifications (H3K27ac, H3K4me1 and H3K4me3) in CD34+ common myeloid progenitors (CMP) and human mesenchymal stem cells (MSCs) across indicated genomic region. Datasets are obtained from the ENCODE project<sup>27</sup>.

(B) Virtual 4C plot of long-range chromatin interactions in monocytes<sup>28</sup> with anchor positions shown with gray bars. Top panel shows deleted segment (chr9:88923551-88924152) as anchor position, bottom panel shows *S1PR3* promoter (chr9:91605763-91606263, bottom) as anchor position. Reciprocally, yellow line highlights the *S1PR3* promoter (chr9:91605763-91606263, upper panel) and the deletion (chr9:88923551-88924152, lower panel). The observed and expected chromatin contact frequencies (or counts) are represented by the black and red lines, respectively. The left Y axis displays the range of chromatin contact frequency. The statistical significance ( $-\log_{10}(\text{P-value})$ ) of each long-range chromatin interaction is represented by the blue line, with its range listed in the right Y axis. All p-values are derived from two-sided t-tests and are not adjusted for multiple comparisons. The cell line or tissue specific FDR threshold (5%) is shown as a cyan horizontal dashed line, and the more stringent Bonferroni threshold ( $P = 0.05$ ) is shown as a blue horizontal dashed line.

**A**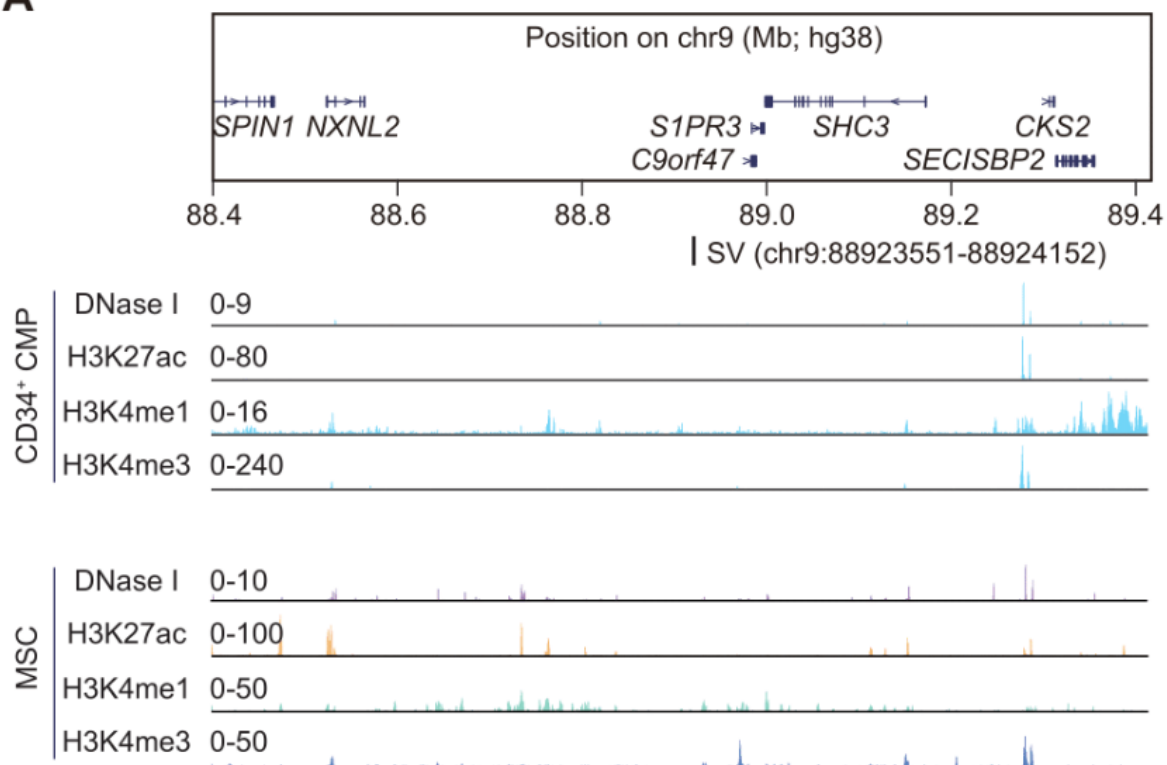**B**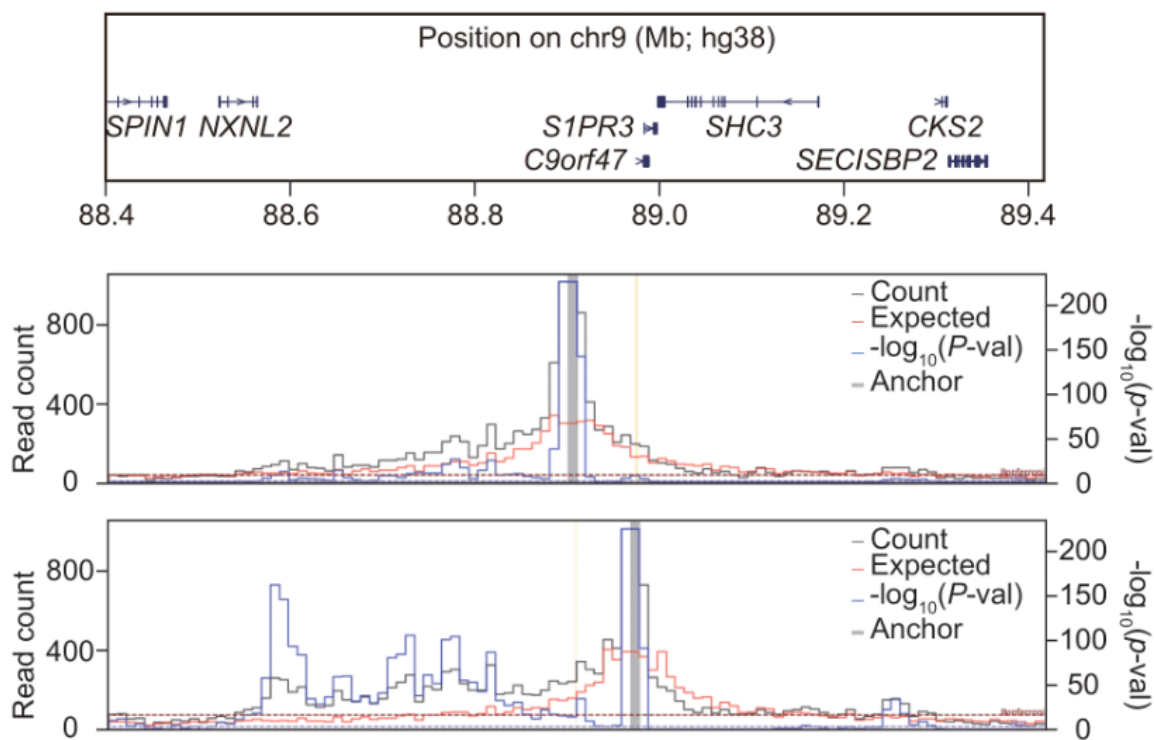

**Figure S8. Epigenome editing implicates *S1PR3* in the 9q22.1 monocyte count association (Related to Figure 2).**

(A-B) eQTL analysis between the 9q22.1 SV and genes within 1 Mb window in peripheral blood mononuclear cells (PBMCs) (A) and T-cells (B) using data from the ancestry-stratified datasets from the Multi-Ethnic Study of Atherosclerosis (MESA, including n = 297 African American and n = 246 Hispanic/Latino participants for PBMC; n = 78 African American and n = 86 Hispanic/Latino participants for T-cell). AFHI: African American and Hispanic/Latino. All p-values are derived from two-sided t-tests and are not adjusted for multiple comparisons.

(C) Schematic of sgRNA locations targeting the *S1PR3* structural variant for CRISPRi with dCas9-KRAB (chr9:88923551-88924152). PAM sequences highlighted in green.

(D-E) Expression of genes within a 1 Mb window in THP-1 cells expressing dCas9-KRAB after transduction with sgRNA #2 (D) or sgRNA #3 (E) targeting the *S1PR3* SV (orange) as compared to a neutral locus control sgRNA (blue). Relative mRNA level of each gene represented by mean  $\pm$  standard deviation (SD). N = 3 replicates, where each replicate is a unique cellular transduction by sgRNA cassette. Two-sided Student's t-test.  $P > 0.05$  for all comparisons except where indicated, \*  $P < 0.05$ . Location of sgRNAs for CRISPRi are indicated (C). P-values for (D) and (E) were 0.043 and 0.033, respectively.

(F) Expression of each gene within a 1 Mb window around the 9q22.1 locus in THP-1 cells relative to *GAPDH*. Genes of undetectable expression level (*CDK20*, *SPATA31C2*, *SPIN1*, *SHC3*, *GADD45G* and *UNQ6494*) are not shown. N = 3 technical replicates. Relative mRNA level of each gene was represented by mean  $\pm$  standard deviation (SD).

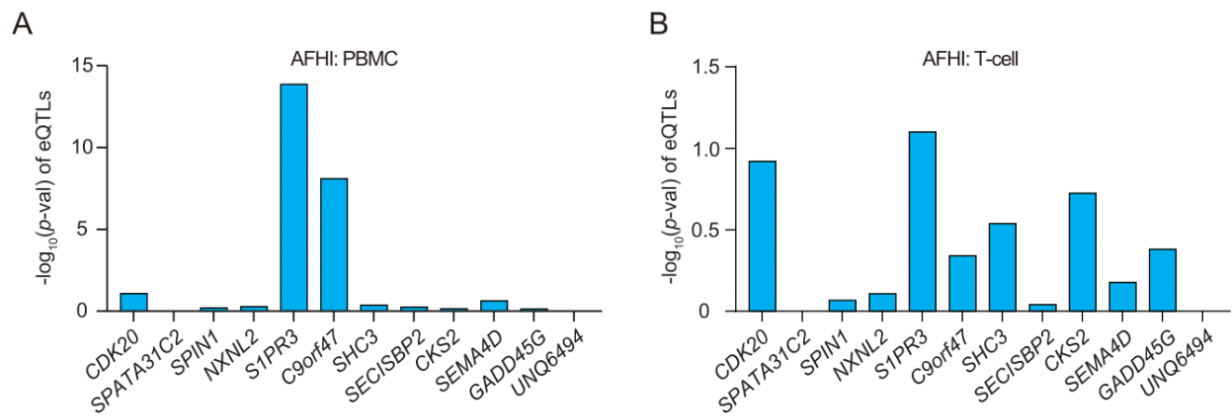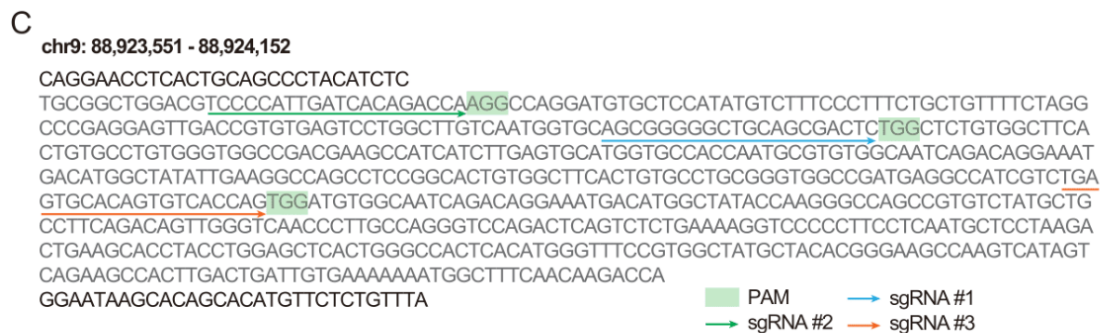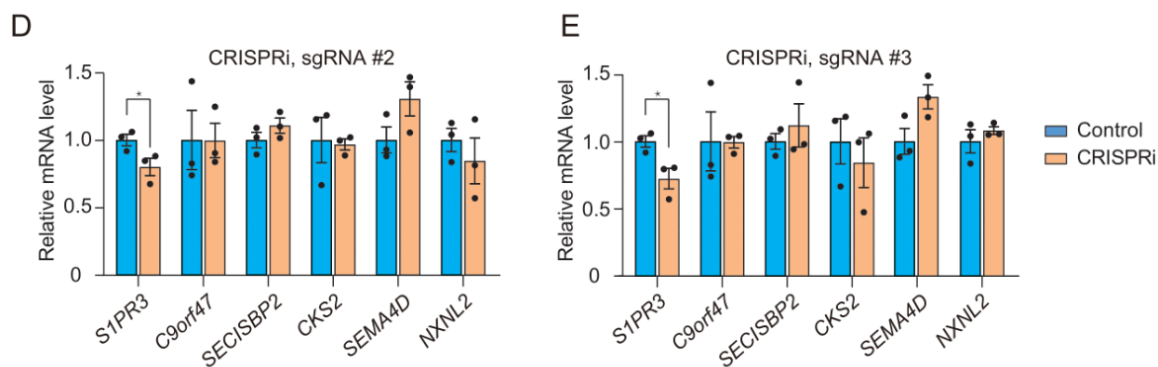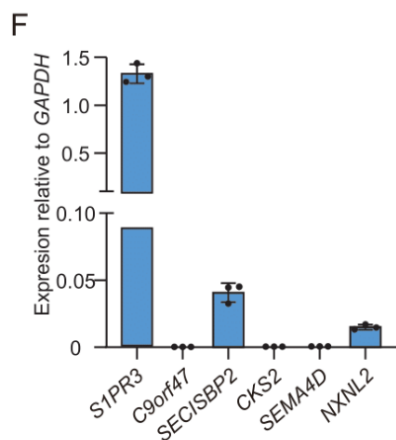

**Figure S9. Human hematopoietic reconstitution of immunodeficient mice after *S1PR3* editing (Related to Figure 2).**

(A-D) Healthy donor CD34<sup>+</sup> HSPCs were edited by indicated RNP and infused to NBSGW mice. After 12 weeks, bone marrow cells were analyzed by flow cytometry. Each symbol represents one mouse. HSPCs, hCD45<sup>+</sup>CD19<sup>-</sup>CD33<sup>-</sup>CD34<sup>+</sup>; B cells, hCD45<sup>+</sup>CD19<sup>+</sup>; Erythroid, hCD45<sup>+</sup>CD45<sup>-</sup>CD235a<sup>+</sup>; Myeloid, hCD45<sup>+</sup>CD33<sup>+</sup>. N=3 replicates, where each replicate indicates one mouse. Mean  $\pm$  SD, 2-sided Mann-Whitney test, unadjusted for multiple comparisons.

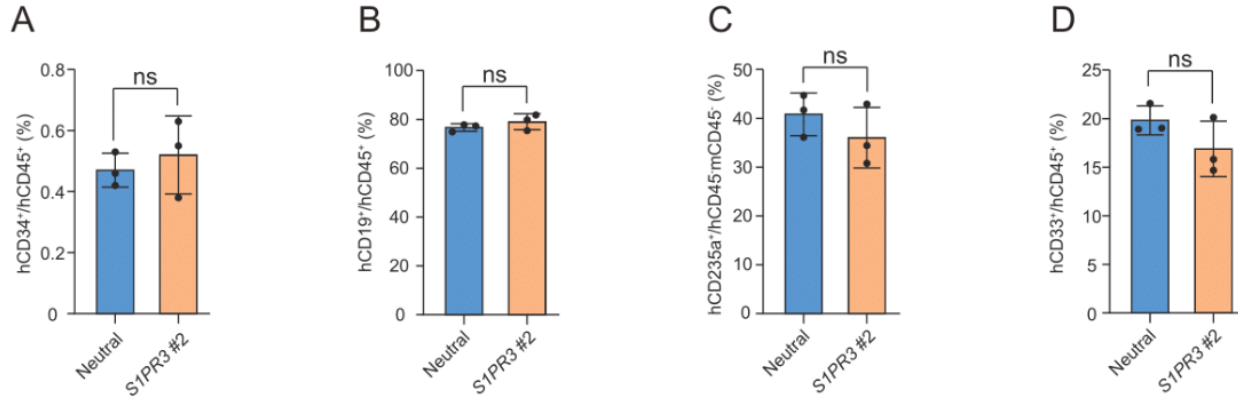

**NHLBI TOPMed Consortium Author list**

| <b>Name</b>               | <b>Institution(s)</b>                                           | <b>Primary Department</b> | <b>Institution City</b> | <b>Institution State</b> | <b>Zip Code</b> | <b>Country</b> |
|---------------------------|-----------------------------------------------------------------|---------------------------|-------------------------|--------------------------|-----------------|----------------|
| Abe, Namiko               | New York Genome Center                                          |                           | New York                | New York                 | 10013           | US             |
| Abecasis, Gonalo         | University of Michigan                                          |                           | Ann Arbor               | Michigan                 | 48109           | US             |
| Aguet, Francois           | Broad Institute                                                 |                           | Cambridge               | Massachusetts            | 02142           | US             |
| Albert, Christine         | Cedars Sinai                                                    |                           | Boston                  | Massachusetts            | 02114           | US             |
| Almasy, Laura             | Children's Hospital of Philadelphia, University of Pennsylvania |                           | Philadelphia            | Pennsylvania             | 19104           | US             |
| Alonso, Alvaro            | Emory University                                                |                           | Atlanta                 | Georgia                  | 30322           | US             |
| Ament, Seth               | University of Maryland                                          |                           | Baltimore               | Maryland                 | 21201           | US             |
| Anderson, Peter           | University of Washington                                        |                           | Seattle                 | Washington               | 98195           | US             |
| Anugu, Pramod             | University of Mississippi                                       |                           | Jackson                 | Mississippi              | 38677           | US             |
| Applebaum-Bowden, Deborah | National Institutes of Health                                   |                           | Bethesda                | Maryland                 | 20892           | US             |
| Ardlie, Kristin           | Broad Institute                                                 |                           | Cambridge               | Massachusetts            | 02142           | US             |
| Arking, Dan               | Johns Hopkins University                                        |                           | Baltimore               | Maryland                 | 21218           | US             |
| Arnett, Donna K           | University of South Carolina                                    |                           |                         |                          |                 | US             |
| Ashley-Koch, Allison      | Duke University                                                 |                           | Durham                  | North Carolina           | 27708           | US             |
| Aslibekyan, Stella        | University of Alabama                                           |                           | Birmingham              | Alabama                  | 35487           | US             |
| Assimes, Tim              | Stanford University                                             |                           | Stanford                | California               | 94305           | US             |
| Auer, Paul                | Medical College of Wisconsin                                    |                           | Milwaukee               | Wisconsin                | 53211           | US             |
| Avramopoulos, Dimitrios   | Johns Hopkins University                                        |                           | Baltimore               | Maryland                 | 21218           | US             |

| Name                     | Institution(s)                                                              | Primary Department                   | Institution City | Institution State | Zip Code | Country |
|--------------------------|-----------------------------------------------------------------------------|--------------------------------------|------------------|-------------------|----------|---------|
| Ayas, Najib              | Providence Health Care                                                      | Medicine                             | Vancouver        |                   |          | CA      |
| Balasubramanian, Adithya | Baylor College of Medicine<br>Human Genome Sequencing Center                |                                      | Houston          | Texas             | 77030    | US      |
| Barnard, John            | Cleveland Clinic                                                            |                                      | Cleveland        | Ohio              | 44195    | US      |
| Barnes, Kathleen         | Tempus, University of Colorado<br>Anschutz Medical Campus                   |                                      | Aurora           | Colorado          | 80045    | US      |
| Barr, R. Graham          | Columbia University                                                         |                                      | New York         | New York          | 10032    | US      |
| Barron-Casella, Emily    | Johns Hopkins University                                                    |                                      | Baltimore        | Maryland          | 21218    | US      |
| Barwick, Lucas           | The Emmes Corporation                                                       | LTRC                                 | Rockville        | Maryland          | 20850    | US      |
| Beaty, Terri             | Johns Hopkins University                                                    |                                      | Baltimore        | Maryland          | 21218    | US      |
| Beck, Gerald             | Cleveland Clinic                                                            | Quantitative Health Sciences         | Cleveland        | Ohio              | 44195    | US      |
| Becker, Diane            | Johns Hopkins University                                                    | Medicine                             | Baltimore        | Maryland          | 21218    | US      |
| Becker, Lewis            | Johns Hopkins University                                                    |                                      | Baltimore        | Maryland          | 21218    | US      |
| Beer, Rebecca            | National Heart, Lung, and Blood Institute,<br>National Institutes of Health |                                      | Bethesda         | Maryland          | 20892    | US      |
| Beitelshees, Amber       | University of Maryland                                                      |                                      | Baltimore        | Maryland          | 21201    | US      |
| Benjamin, Emelia         | Boston University,<br>Massachusetts General Hospital                        | Boston University School of Medicine | Boston           | Massachusetts     | 02114    | US      |

| Name              | Institution(s)                                               | Primary Department                                          | Institution City | Institution State | Zip Code  | Country |
|-------------------|--------------------------------------------------------------|-------------------------------------------------------------|------------------|-------------------|-----------|---------|
| Benos, Takis      | University of Pittsburgh                                     |                                                             | Pittsburgh       | Pennsylvania      | 15260     | US      |
| Bezerra, Marcos   | Fundação de Hematologia e Hemoterapia de Pernambuco - Hemope |                                                             | Recife           |                   | 52011-000 | BR      |
| Bielak, Larry     | University of Michigan                                       |                                                             | Ann Arbor        | Michigan          | 48109     | US      |
| Bis, Joshua       | University of Washington                                     | Cardiovascular Health Research Unit, Department of Medicine | Seattle          | Washington        | 98195     | US      |
| Blackwell, Thomas | University of Michigan                                       |                                                             | Ann Arbor        | Michigan          | 48109     | US      |
| Blangero, John    | University of Texas Rio Grande Valley School of Medicine     | Human Genetics                                              | Brownsville      | Texas             | 78520     | US      |
| Blue, Nathan      | University of Utah                                           | Obstetrics and Gynecology                                   | Salt Lake City   | Utah              | 84132     | US      |
| Boerwinkle, Eric  | University of Texas Health at Houston                        |                                                             | Houston          | Texas             | 77225     | US      |
| Bowden, Donald W. | Wake Forest Baptist Health                                   | Department of Biochemistry                                  | Winston-Salem    | North Carolina    | 27157     | US      |
| Bowler, Russell   | National Jewish Health                                       | National Jewish Health                                      | Denver           | Colorado          | 80206     | US      |
| Brody, Jennifer   | University of Washington                                     |                                                             | Seattle          | Washington        | 98195     | US      |
| Broeckel, Ulrich  | Medical College of Wisconsin                                 | Pediatrics                                                  | Milwaukee        | Wisconsin         | 53226     | US      |
| Broome, Jai       | University of Washington                                     |                                                             | Seattle          | Washington        | 98195     | US      |
| Brown, Deborah    | University of Texas Health at Houston                        | Pediatrics                                                  | Houston          | Texas             | 77030     | US      |
| Bunting, Karen    | New York Genome Center                                       |                                                             | New York         | New York          | 10013     | US      |

| Name                 | Institution(s)                          | Primary Department              | Institution City | Institution State | Zip Code | Country |
|----------------------|-----------------------------------------|---------------------------------|------------------|-------------------|----------|---------|
| Burchard, Esteban    | University of California, San Francisco |                                 | San Francisco    | California        | 94143    | US      |
| Bustamante, Carlos   | Stanford University                     | Biomedical Data Science         | Stanford         | California        | 94305    | US      |
| Buth, Erin           | University of Washington                | Biostatistics                   | Seattle          | Washington        | 98195    | US      |
| Cade, Brian          | Brigham & Women's Hospital              | Brigham and Women's Hospital    | Boston           | Massachusetts     | 02115    | US      |
| Cardwell, Jonathan   | University of Colorado at Denver        |                                 | Denver           | Colorado          | 80204    | US      |
| Carey, Vincent       | Brigham & Women's Hospital              |                                 | Boston           | Massachusetts     | 02115    | US      |
| Carrier, Julie       | University of Montreal                  |                                 |                  |                   |          | US      |
| Carson, April P.     | University of Mississippi               | Medicine                        | Jackson          | Mississippi       | 39213    | US      |
| Carty, Cara          | Washington State University             |                                 | Pullman          | Washington        | 99164    | US      |
| Casaburi, Richard    | University of California, Los Angeles   |                                 | Los Angeles      | California        | 90095    | US      |
| Casas Romero, Juan P | Brigham & Women's Hospital              |                                 |                  |                   |          | US      |
| Casella, James       | Johns Hopkins University                |                                 | Baltimore        | Maryland          | 21218    | US      |
| Castaldi, Peter      | Brigham & Women's Hospital              | Medicine                        | Boston           | Massachusetts     | 02115    | US      |
| Chaffin, Mark        | Broad Institute                         |                                 | Cambridge        | Massachusetts     | 02142    | US      |
| Chang, Christy       | University of Maryland                  |                                 | Baltimore        | Maryland          | 21201    | US      |
| Chang, Yi-Cheng      | National Taiwan University              |                                 | Taipei           |                   | 10617    | TW      |
| Chasman, Daniel      | Brigham & Women's Hospital              | Division of Preventive Medicine | Boston           | Massachusetts     | 02215    | US      |

| Name                 | Institution(s)                            | Primary Department                  | Institution City | Institution State | Zip Code | Country |
|----------------------|-------------------------------------------|-------------------------------------|------------------|-------------------|----------|---------|
| Chavan, Sameer       | University of Colorado at Denver          |                                     | Denver           | Colorado          | 80204    | US      |
| Chen, Bo-Juen        | New York Genome Center                    |                                     | New York         | New York          | 10013    | US      |
| Chen, Wei-Min        | University of Virginia                    |                                     | Charlottesville  | Virginia          | 22903    | US      |
| Chen, Yii-Der Ida    | Lundquist Institute                       |                                     | Torrance         | California        | 90502    | US      |
| Cho, Michael         | Brigham & Women's Hospital                |                                     | Boston           | Massachusetts     | 02115    | US      |
| Choi, Seung Hoan     | Broad Institute                           |                                     | Cambridge        | Massachusetts     | 02142    | US      |
| Chuang, Lee-Ming     | National Taiwan University                | National Taiwan University Hospital | Taipei           |                   | 10617    | TW      |
| Chung, Mina          | Cleveland Clinic                          | Cleveland Clinic                    | Cleveland        | Ohio              | 44195    | US      |
| Chung, Ren-Hua       | National Health Research Institute Taiwan |                                     | Miaoli County    |                   | 350      | TW      |
| Clish, Clary         | Broad Institute                           | Metabolomics Platform               | Cambridge        | Massachusetts     | 02142    | US      |
| Comhair, Suzy        | Cleveland Clinic                          | Immunity and Immunology             | Cleveland        | Ohio              | 44195    | US      |
| Conomos, Matthew     | University of Washington                  | Biostatistics                       | Seattle          | Washington        | 98195    | US      |
| Cornell, Elaine      | University of Vermont                     |                                     | Burlington       | Vermont           | 05405    | US      |
| Correa, Adolfo       | University of Mississippi                 | Population Health Science           | Jackson          | Mississippi       | 39216    | US      |
| Crandall, Carolyn    | University of California, Los Angeles     |                                     | Los Angeles      | California        | 90095    | US      |
| Crapo, James         | National Jewish Health                    |                                     | Denver           | Colorado          | 80206    | US      |
| Cupples, L. Adrienne | Boston University                         | Biostatistics                       | Boston           | Massachusetts     | 02115    | US      |
| Curran, Joanne       | University of Texas Rio                   |                                     | Brownsville      | Texas             | 78520    | US      |

| Name                 | Institution(s)                        | Primary Department                                                                            | Institution City | Institution State | Zip Code | Country |
|----------------------|---------------------------------------|-----------------------------------------------------------------------------------------------|------------------|-------------------|----------|---------|
|                      | Grande Valley School of Medicine      |                                                                                               |                  |                   |          |         |
| Curtis, Jeffrey      | University of Michigan                | Internal Medicine                                                                             | Ann Arbor        | Michigan          | 48109    | US      |
| Custer, Brian        | Vitalant Research Institute           |                                                                                               | San Francisco    | California        | 94118    | US      |
| Damcott, Coleen      | University of Maryland                |                                                                                               | Baltimore        | Maryland          | 21201    | US      |
| Darbar, Dawood       | University of Illinois at Chicago     |                                                                                               | Chicago          | Illinois          | 60607    | US      |
| David, Sean          | University of Chicago                 |                                                                                               | Chicago          | Illinois          | 60637    | US      |
| Davis, Colleen       | University of Washington              |                                                                                               | Seattle          | Washington        | 98195    | US      |
| Daya, Michelle       | University of Colorado at Denver      |                                                                                               | Denver           | Colorado          | 80204    | US      |
| de Andrade, Mariza   | Mayo Clinic                           | Health Quantitative Sciences Research                                                         | Rochester        | Minnesota         | 55905    | US      |
| de las Fuentes, Lisa | Washington University in St Louis     | Department of Medicine, Cardiovascular Division                                               | St. Louis        | Missouri          | 63110    | US      |
| de Vries, Paul       | University of Texas Health at Houston | Human Genetics Center, Department of Epidemiology, Human Genetics, and Environmental Sciences | Houston          | Texas             | 77030    | US      |
| DeBaun, Michael      | Vanderbilt University                 |                                                                                               | Nashville        | Tennessee         | 37235    | US      |
| Deka, Ranjan         | University of Cincinnati              |                                                                                               | Cincinnati       | Ohio              | 45220    | US      |
| DeMeo, Dawn          | Brigham & Women's Hospital            |                                                                                               | Boston           | Massachusetts     | 02115    | US      |
| Devine, Scott        | University of Maryland                |                                                                                               | Baltimore        | Maryland          | 21201    | US      |
| Dinh, Huyen          | Baylor College of Medicine            |                                                                                               | Houston          | Texas             | 77030    | US      |

| Name                 | Institution(s)                                            | Primary Department                    | Institution City | Institution State | Zip Code | Country |
|----------------------|-----------------------------------------------------------|---------------------------------------|------------------|-------------------|----------|---------|
|                      | Human Genome Sequencing Center                            |                                       |                  |                   |          |         |
| Doddapaneni, Harsha  | Baylor College of Medicine Human Genome Sequencing Center |                                       | Houston          | Texas             | 77030    |         |
| Duan, Qing           | University of North Carolina                              |                                       | Chapel Hill      | North Carolina    | 27599    | US      |
| Dugan-Perez, Shannon | Baylor College of Medicine Human Genome Sequencing Center | BCM                                   | Houston          | Texas             | 77030    | US      |
| Duggirala, Ravi      | University of Texas Rio Grande Valley School of Medicine  |                                       | Edinburg         | Texas             | 78539    | US      |
| Durda, Jon Peter     | University of Vermont                                     |                                       | Burlington       | Vermont           | 05405    | US      |
| Dutcher, Susan K.    | Washington University in St Louis                         | Genetics                              | St Louis         | Missouri          | 63110    | US      |
| Eaton, Charles       | Brown University                                          |                                       | Providence       | Rhode Island      | 02912    | US      |
| Ekunwe, Lynette      | University of Mississippi                                 |                                       | Jackson          | Mississippi       | 38677    | US      |
| El Boueiz, Adel      | Harvard University                                        | Channing Division of Network Medicine | Cambridge        | Massachusetts     | 02138    | US      |
| Ellinor, Patrick     | Massachusetts General Hospital                            |                                       | Boston           | Massachusetts     | 02114    | US      |
| Emery, Leslie        | University of Washington                                  |                                       | Seattle          | Washington        | 98195    | US      |
| Erzurum, Serpil      | Cleveland Clinic                                          | Lerner Research Institute             | Cleveland        | Ohio              | 44195    | US      |
| Farber, Charles      | University of Virginia                                    |                                       | Charlottesville  | Virginia          | 22903    | US      |

| Name                    | Institution(s)                                                           | Primary Department                       | Institution City | Institution State | Zip Code | Country |
|-------------------------|--------------------------------------------------------------------------|------------------------------------------|------------------|-------------------|----------|---------|
| Farek, Jesse            | Baylor College of Medicine<br>Human Genome Sequencing Center             |                                          | Houston          | Texas             | 77030    | US      |
| Fingerlin, Tasha        | National Jewish Health                                                   | Center for Genes, Environment and Health | Denver           | Colorado          | 80206    | US      |
| Flickinger, Matthew     | University of Michigan                                                   |                                          | Ann Arbor        | Michigan          | 48109    | US      |
| Fornage, Myriam         | University of Texas Health at Houston                                    |                                          | Houston          | Texas             | 77225    | US      |
| Franceschini, Nora      | University of North Carolina                                             | Epidemiology                             | Chapel Hill      | North Carolina    | 27599    | US      |
| Frazar, Chris           | University of Washington                                                 |                                          | Seattle          | Washington        | 98195    | US      |
| Fu, Mao                 | University of Maryland                                                   |                                          | Baltimore        | Maryland          | 21201    | US      |
| Fullerton, Stephanie M. | University of Washington                                                 |                                          | Seattle          | Washington        | 98195    | US      |
| Fulton, Lucinda         | Washington University in St Louis                                        |                                          | St Louis         | Missouri          | 63130    | US      |
| Gabriel, Stacey         | Broad Institute                                                          |                                          | Cambridge        | Massachusetts     | 02142    | US      |
| Gan, Weiniu             | National Heart, Lung, and Blood Institute, National Institutes of Health |                                          | Bethesda         | Maryland          | 20892    | US      |
| Gao, Shanshan           | University of Colorado at Denver                                         |                                          | Denver           | Colorado          | 80204    | US      |
| Gao, Yan                | University of Mississippi                                                |                                          | Jackson          | Mississippi       | 38677    | US      |
| Gass, Margery           | Fred Hutchinson Cancer Research Center                                   |                                          | Seattle          | Washington        | 98109    | US      |

| Name                | Institution(s)                                            | Primary Department       | Institution City | Institution State | Zip Code | Country |
|---------------------|-----------------------------------------------------------|--------------------------|------------------|-------------------|----------|---------|
| Geiger, Heather     | New York Genome Center                                    |                          | New York City    | New York          | 10013    | US      |
| Gelb, Bruce         | Icahn School of Medicine at Mount Sinai                   |                          | New York         | New York          | 10029    | US      |
| Geraci, Mark        | University of Pittsburgh                                  |                          | Pittsburgh       | Pennsylvania      |          | US      |
| Germer, Soren       | New York Genome Center                                    |                          | New York         | New York          | 10013    | US      |
| Gerszten, Robert    | Beth Israel Deaconess Medical Center                      |                          | Boston           | Massachusetts     | 02215    | US      |
| Ghosh, Auyon        | Brigham & Women's Hospital                                |                          | Boston           | Massachusetts     | 02115    | US      |
| Gibbs, Richard      | Baylor College of Medicine Human Genome Sequencing Center |                          | Houston          | Texas             | 77030    | US      |
| Gignoux, Chris      | Stanford University                                       |                          | Stanford         | California        | 94305    | US      |
| Gladwin, Mark       | University of Pittsburgh                                  |                          | Pittsburgh       | Pennsylvania      | 15260    | US      |
| Glahn, David        | Boston Children's Hospital, Harvard Medical School        | Department of Psychiatry | Boston           | Massachusetts     | 02115    | US      |
| Gogarten, Stephanie | University of Washington                                  |                          | Seattle          | Washington        | 98195    | US      |
| Gong, Da-Wei        | University of Maryland                                    |                          | Baltimore        | Maryland          | 21201    | US      |
| Goring, Harald      | University of Texas Rio Grande Valley School of Medicine  |                          | San Antonio      | Texas             | 78229    | US      |
| Graw, Sharon        | University of Colorado Anschutz                           |                          | Aurora           | Colorado          | 80045    | US      |

| Name              | Institution(s)                                            | Primary Department                         | Institution City | Institution State | Zip Code | Country |
|-------------------|-----------------------------------------------------------|--------------------------------------------|------------------|-------------------|----------|---------|
|                   | Medical Campus                                            |                                            |                  |                   |          |         |
| Gray, Kathryn J.  | Mass General Brigham                                      | Obstetrics and Gynecology                  | Boston           | Massachusetts     | 02115    | US      |
| Grine, Daniel     | University of Colorado at Denver                          |                                            | Denver           | Colorado          | 80204    | US      |
| Gross, Colin      | University of Michigan                                    |                                            | Ann Arbor        | Michigan          | 48109    | US      |
| Gu, C. Charles    | Washington University in St Louis                         |                                            | St Louis         | Missouri          | 63130    | US      |
| Guan, Yue         | University of Maryland                                    |                                            | Baltimore        | Maryland          | 21201    | US      |
| Guo, Xiuqing      | Lundquist Institute                                       |                                            | Torrance         | California        | 90502    | US      |
| Gupta, Namrata    | Broad Institute                                           |                                            | Cambridge        | Massachusetts     | 02142    | US      |
| Haessler, Jeff    | Fred Hutchinson Cancer Research Center                    |                                            | Seattle          | Washington        | 98109    | US      |
| Hall, Michael     | University of Mississippi                                 | Cardiology                                 | Jackson          | Mississippi       | 39216    | US      |
| Han, Yi           | Baylor College of Medicine Human Genome Sequencing Center |                                            | Houston          | Texas             | 77030    | US      |
| Hanly, Patrick    | University of Calgary                                     | Medicine                                   | Calgary          |                   |          | CA      |
| Harris, Daniel    | University of Maryland                                    | Genetics                                   | Philadelphia     | Pennsylvania      | 19104    | US      |
| Hawley, Nicola L. | Yale University                                           | Department of Chronic Disease Epidemiology | New Haven        | Connecticut       | 06520    | US      |
| He, Jiang         | Tulane University                                         |                                            | New Orleans      | Louisiana         | 70118    | US      |
| Heavner, Ben      | University of Washington                                  | Biostatistics                              | Seattle          | Washington        | 98195    | US      |
| Heckbert, Susan   | University of Washington                                  | Epidemiology                               | Seattle          | Washington        | 98195    | US      |

| Name                 | Institution(s)                                                  | Primary Department                            | Institution City | Institution State | Zip Code | Country |
|----------------------|-----------------------------------------------------------------|-----------------------------------------------|------------------|-------------------|----------|---------|
| Hernandez, Ryan      | University of California, San Francisco                         |                                               | San Francisco    | California        | 94143    | US      |
| Herrington, David    | Wake Forest Baptist Health                                      |                                               | Winston-Salem    | North Carolina    | 27157    | US      |
| Hersh, Craig         | Brigham & Women's Hospital                                      | Channing Division of Network Medicine         | Boston           | Massachusetts     | 02115    | US      |
| Hidalgo, Bertha      | University of Alabama                                           |                                               | Birmingham       | Alabama           | 35487    | US      |
| Hixson, James        | University of Texas Health at Houston                           |                                               | Houston          | Texas             | 77225    | US      |
| Hobbs, Brian         | Brigham & Women's Hospital                                      |                                               | Boston           | Massachusetts     | 02115    | US      |
| Hokanson, John       | University of Colorado at Denver                                |                                               | Denver           | Colorado          | 80204    | US      |
| Hong, Elliott        | University of Maryland                                          |                                               | Baltimore        | Maryland          | 21201    | US      |
| Hoth, Karin          | University of Iowa                                              |                                               | Iowa City        | Iowa              | 52242    | US      |
| Hsiung, Chao (Agnes) | National Health Research Institute Taiwan                       | Institute of Population Health Sciences, NHRI | Miaoli County    |                   | 350      | TW      |
| Hu, Jianhong         | Baylor College of Medicine Human Genome Sequencing Center       |                                               | Houston          | Texas             | 77030    | US      |
| Hung, Yi-Jen         | Tri-Service General Hospital<br>National Defense Medical Center |                                               |                  |                   |          | TW      |
| Huston, Haley        | Blood Works Northwest                                           |                                               | Seattle          | Washington        | 98104    | US      |
| Hwu, Chii Min        | Taichung Veterans General                                       |                                               | Taichung City    |                   | 407      | TW      |

| Name                   | Institution(s)                                                           | Primary Department                                                    | Institution City | Institution State | Zip Code | Country |
|------------------------|--------------------------------------------------------------------------|-----------------------------------------------------------------------|------------------|-------------------|----------|---------|
|                        | Hospital Taiwan                                                          |                                                                       |                  |                   |          |         |
| Irvin, Marguerite Ryan | University of Alabama                                                    |                                                                       | Birmingham       | Alabama           | 35487    | US      |
| Jackson, Rebecca       | Oklahoma State University Medical Center                                 | Internal Medicine, Division of Endocrinology, Diabetes and Metabolism | Columbus         | Ohio              | 43210    | US      |
| Jain, Deepti           | University of Washington                                                 |                                                                       | Seattle          | Washington        | 98195    | US      |
| Jaquish, Cashell       | National Heart, Lung, and Blood Institute, National Institutes of Health | NHLBI                                                                 | Bethesda         | Maryland          | 20892    | US      |
| Johnsen, Jill          | Blood Works Northwest                                                    | Medicine                                                              | Seattle          | Washington        | 98109    | US      |
| Johnson, Andrew        | National Heart, Lung, and Blood Institute, National Institutes of Health |                                                                       | Bethesda         | Maryland          | 20892    | US      |
| Johnson, Craig         | University of Washington                                                 |                                                                       | Seattle          | Washington        | 98195    | US      |
| Johnston, Rich         | Emory University                                                         |                                                                       | Atlanta          | Georgia           | 30322    | US      |
| Jones, Kimberly        | Johns Hopkins University                                                 |                                                                       | Baltimore        | Maryland          | 21218    | US      |
| Kang, Hyun Min         | University of Michigan                                                   | Biostatistics                                                         | Ann Arbor        | Michigan          | 48109    | US      |
| Kaplan, Robert         | Albert Einstein College of Medicine                                      |                                                                       | New York         | New York          | 10461    | US      |
| Kardia, Sharon         | University of Michigan                                                   |                                                                       | Ann Arbor        | Michigan          | 48109    | US      |
| Kelly, Shannon         | University of California, San Francisco                                  |                                                                       | San Francisco    | California        | 94118    | US      |

| Name                | Institution(s)                                            | Primary Department     | Institution City | Institution State | Zip Code   | Country |
|---------------------|-----------------------------------------------------------|------------------------|------------------|-------------------|------------|---------|
| Kenny, Eimear       | Icahn School of Medicine at Mount Sinai                   |                        | New York         | New York          | 10029      | US      |
| Kessler, Michael    | University of Maryland                                    |                        | Baltimore        | Maryland          | 21201      | US      |
| Khan, Alyna         | University of Washington                                  |                        | Seattle          | Washington        | 98195      | US      |
| Khan, Ziad          | Baylor College of Medicine Human Genome Sequencing Center |                        | Houston          | Texas             | 77030      | US      |
| Kim, Wonji          | Harvard University                                        |                        | Cambridge        | Massachusetts     | 02138      | US      |
| Kimoff, John        | McGill University                                         |                        | Montréal         |                   | QC H3A 0G4 | CA      |
| Kinney, Greg        | University of Colorado at Denver                          | Epidemiology           | Aurora           | Colorado          | 80045      | US      |
| Konkle, Barbara     | Blood Works Northwest                                     | Medicine               | Seattle          | Washington        | 98104      | US      |
| Kooperberg, Charles | Fred Hutchinson Cancer Research Center                    |                        | Seattle          | Washington        | 98109      | US      |
| Kramer, Holly       | Loyola University                                         | Public Health Sciences | Maywood          | Illinois          | 60153      | US      |
| Lange, Christoph    | Harvard School of Public Health                           | Biostats               | Boston           | Massachusetts     | 02115      | US      |
| Lange, Ethan        | University of Colorado at Denver                          |                        | Denver           | Colorado          | 80204      | US      |
| Lange, Leslie       | University of Colorado at Denver                          | Medicine               | Aurora           | Colorado          | 80048      | US      |
| Laurie, Cathy       | University of Washington                                  |                        | Seattle          | Washington        | 98195      | US      |
| Laurie, Cecelia     | University of Washington                                  |                        | Seattle          | Washington        | 98195      | US      |

| Name              | Institution(s)                                                           | Primary Department                              | Institution City | Institution State | Zip Code | Country |
|-------------------|--------------------------------------------------------------------------|-------------------------------------------------|------------------|-------------------|----------|---------|
| LeBoff, Meryl     | Brigham & Women's Hospital                                               |                                                 | Boston           | Massachusetts     | 02115    | US      |
| Lee, Jiwon        | Brigham & Women's Hospital                                               |                                                 | Boston           | Massachusetts     | 02115    | US      |
| Lee, Sandra       | Baylor College of Medicine Human Genome Sequencing Center                |                                                 | Houston          | Texas             | 77030    | US      |
| Lee, Wen-Jane     | Taichung Veterans General Hospital Taiwan                                |                                                 | Taichung City    |                   | 407      | TW      |
| LeFaive, Jonathon | University of Michigan                                                   |                                                 | Ann Arbor        | Michigan          | 48109    | US      |
| Levine, David     | University of Washington                                                 |                                                 | Seattle          | Washington        | 98195    | US      |
| Levy, Dan         | National Heart, Lung, and Blood Institute, National Institutes of Health |                                                 | Bethesda         | Maryland          | 20892    | US      |
| Lewis, Joshua     | University of Maryland                                                   |                                                 | Baltimore        | Maryland          | 21201    | US      |
| Li, Xiaohui       | Lundquist Institute                                                      |                                                 | Torrance         | California        | 90502    | US      |
| Li, Yun           | University of North Carolina                                             |                                                 | Chapel Hill      | North Carolina    | 27599    | US      |
| Lin, Henry        | Lundquist Institute                                                      |                                                 | Torrance         | California        | 90502    | US      |
| Lin, Honghuang    | Boston University                                                        | University of Massachusetts Chan Medical School | Worcester        | Massachusetts     | 01655    | US      |
| Lin, Xihong       | Harvard School of Public Health                                          |                                                 | Boston           | Massachusetts     | 02115    | US      |
| Liu, Simin        | Brown University                                                         | Epidemiology and Medicine                       | Providence       | Rhode Island      | 02912    | US      |

| Name              | Institution(s)                                                           | Primary Department                                       | Institution City | Institution State    | Zip Code | Country |
|-------------------|--------------------------------------------------------------------------|----------------------------------------------------------|------------------|----------------------|----------|---------|
| Liu, Yongmei      | Duke University                                                          | Cardiology                                               | Durham           | North Carolina       | 27708    | US      |
| Liu, Yu           | Stanford University                                                      | Cardiovascular Institute                                 | Stanford         | California           | 94305    | US      |
| Loos, Ruth J.F.   | Icahn School of Medicine at Mount Sinai                                  | The Charles Bronfman Institute for Personalized Medicine | New York         | New York             | 10029    | US      |
| Lubitz, Steven    | Massachusetts General Hospital                                           |                                                          | Boston           | Massachusetts        | 02114    | US      |
| Lunetta, Kathryn  | Boston University                                                        |                                                          | Boston           | Massachusetts        | 02215    | US      |
| Luo, James        | National Heart, Lung, and Blood Institute, National Institutes of Health |                                                          | Bethesda         | Maryland             | 20892    | US      |
| Magalang, Ulysses | The Ohio State University                                                | Division of Pulmonary, Critical Care and Sleep Medicine  | Columbus         | Ohio                 | 43210    | US      |
| Mahaney, Michael  | University of Texas Rio Grande Valley School of Medicine                 |                                                          | Brownsville      | Texas                | 78520    | US      |
| Make, Barry       | Johns Hopkins University                                                 |                                                          | Baltimore        | Maryland             | 21218    | US      |
| Manichaikul, Ani  | University of Virginia                                                   |                                                          | Charlottesville  | Virginia             | 22903    | US      |
| Manning, Alisa    | Broad Institute, Harvard University, Massachusetts General Hospital      |                                                          |                  |                      |          |         |
| Manson, JoAnn     | Brigham & Women's Hospital                                               |                                                          | Boston           | Massachusetts        | 02115    | US      |
| Martin, Lisa      | George Washington University                                             | cardiology                                               | Washington       | District of Columbia | 20037    | US      |

| Name                 | Institution(s)                                            | Primary Department                  | Institution City | Institution State | Zip Code | Country |
|----------------------|-----------------------------------------------------------|-------------------------------------|------------------|-------------------|----------|---------|
| Marton, Melissa      | New York Genome Center                                    |                                     | New York City    | New York          | 10013    | US      |
| Mathai, Susan        | University of Colorado at Denver                          |                                     | Denver           | Colorado          | 80204    | US      |
| Mathias, Rasika      | Johns Hopkins University                                  |                                     | Baltimore        | Maryland          | 21218    | US      |
| May, Susanne         | University of Washington                                  | Biostatistics                       | Seattle          | Washington        | 98195    | US      |
| McArdle, Patrick     | University of Maryland                                    |                                     | Baltimore        | Maryland          | 21201    | US      |
| McDonald, Merry-Lynn | University of Alabama                                     | University of Alabama at Birmingham | Birmingham       | Alabama           | 35487    | US      |
| McFarland, Sean      | Harvard University                                        |                                     | Cambridge        | Massachusetts     | 02138    | US      |
| McGarvey, Stephen    | Brown University                                          | Epidemiology                        | Providence       | Rhode Island      | 02912    | US      |
| McGoldrick, Daniel   | University of Washington                                  | Genome Sciences                     | Seattle          | Washington        | 98195    | US      |
| McHugh, Caitlin      | University of Washington                                  | Biostatistics                       | Seattle          | Washington        | 98195    | US      |
| McNeil, Becky        | RTI International                                         |                                     |                  |                   |          | US      |
| Mei, Hao             | University of Mississippi                                 |                                     | Jackson          | Mississippi       | 38677    | US      |
| Meigs, James         | Massachusetts General Hospital                            | Medicine                            | Boston           | Massachusetts     | 02114    | US      |
| Menon, Vipin         | Baylor College of Medicine Human Genome Sequencing Center |                                     | Houston          | Texas             | 77030    | US      |
| Mestroni, Luisa      | University of Colorado Anschutz Medical Campus            |                                     | Aurora           | Colorado          | 80045    | US      |
| Metcalf, Ginger      | Baylor College of Medicine Human                          |                                     | Houston          | Texas             | 77030    | US      |

| Name                 | Institution(s)                                                                          | Primary Department                     | Institution City | Institution State | Zip Code | Country |
|----------------------|-----------------------------------------------------------------------------------------|----------------------------------------|------------------|-------------------|----------|---------|
|                      | Genome Sequencing Center                                                                |                                        |                  |                   |          |         |
| Meyers, Deborah A    | University of Arizona                                                                   |                                        | Tucson           | Arizona           | 85721    | US      |
| Mignot, Emmanuel     | Stanford University                                                                     | Center For Sleep Sciences and Medicine | Palo Alto        | California        | 94304    | US      |
| Mikulla, Julie       | National Heart, Lung, and Blood Institute, National Institutes of Health                |                                        | Bethesda         | Maryland          | 20892    | US      |
| Min, Nancy           | University of Mississippi                                                               |                                        | Jackson          | Mississippi       | 38677    | US      |
| Minear, Mollie       | National Institute of Child Health and Human Development, National Institutes of Health |                                        | Bethesda         | Maryland          | 20892    | US      |
| Minster, Ryan L      | University of Pittsburgh                                                                |                                        | Pittsburgh       | Pennsylvania      | 15260    | US      |
| Mitchell, Braxton D. | University of Maryland                                                                  |                                        | Baltimore        | Maryland          | 21201    | US      |
| Moll, Matt           | Brigham & Women's Hospital                                                              | Medicine                               | Boston           | Massachusetts     | 02115    | US      |
| Momin, Zeineen       | Baylor College of Medicine Human Genome Sequencing Center                               |                                        | Houston          | Texas             | 77030    | US      |
| Montasser, May E.    | University of Maryland                                                                  |                                        | Baltimore        | Maryland          | 21201    | US      |
| Montgomery, Courtney | Oklahoma Medical Research Foundation                                                    | Genes and Human Disease                | Oklahoma City    | Oklahoma          | 73104    | US      |

| Name                 | Institution(s)                                               | Primary Department            | Institution City | Institution State    | Zip Code | Country |
|----------------------|--------------------------------------------------------------|-------------------------------|------------------|----------------------|----------|---------|
| Muzny, Donna         | Baylor College of Medicine<br>Human Genome Sequencing Center |                               | Houston          | Texas                | 77030    | US      |
| Mychaleckyj, Josyf C | University of Virginia                                       |                               | Charlottesville  | Virginia             | 22903    | US      |
| Nadkarni, Girish     | Icahn School of Medicine at Mount Sinai                      |                               | New York         | New York             | 10029    | US      |
| Naik, Rakhi          | Johns Hopkins University                                     |                               | Baltimore        | Maryland             | 21218    | US      |
| Naseri, Take         | Ministry of Health,<br>Government of Samoa                   |                               | Apia             |                      |          | WS      |
| Natarajan, Pradeep   | Broad Institute                                              |                               | Cambridge        | Massachusetts        | 02142    | US      |
| Nekhai, Sergei       | Howard University                                            |                               | Washington       | District of Columbia | 20059    | US      |
| Nelson, Sarah C.     | University of Washington                                     | Biostatistics                 | Seattle          | Washington           | 98195    | US      |
| Neltner, Bonnie      | University of Colorado at Denver                             |                               | Denver           | Colorado             | 80204    | US      |
| Nessner, Caitlin     | Baylor College of Medicine<br>Human Genome Sequencing Center |                               | Houston          | Texas                | 77030    | US      |
| Nickerson, Deborah   | University of Washington                                     | Department of Genome Sciences | Seattle          | Washington           | 98195    | US      |
| Nkechinyere, Osuji   | Baylor College of Medicine<br>Human Genome Sequencing Center |                               | Houston          | Texas                | 77030    | US      |
| North, Kari          | University of North Carolina                                 |                               | Chapel Hill      | North Carolina       | 27599    | US      |
| O'Connell, Jeff      | University of Maryland                                       |                               | Baltimore        | Maryland             | 21201    | US      |

| Name                 | Institution(s)                                                           | Primary Department                                | Institution City       | Institution State | Zip Code   | Country |
|----------------------|--------------------------------------------------------------------------|---------------------------------------------------|------------------------|-------------------|------------|---------|
| O'Connor, Tim        | University of Maryland                                                   |                                                   | Baltimore              | Maryland          | 21201      | US      |
| Ochs-Balcom, Heather | University at Buffalo                                                    |                                                   | Buffalo                | New York          | 14260      | US      |
| Okwuonu, Geoffrey    | Baylor College of Medicine Human Genome Sequencing Center                |                                                   | Houston                | Texas             | 77030      | US      |
| Pack, Allan          | University of Pennsylvania                                               | Division of Sleep Medicine/Department of Medicine | Philadelphia           | Pennsylvania      | 19104-3403 | US      |
| Paik, David T.       | Stanford University                                                      | Stanford Cardiovascular Institute                 | Stanford               | California        | 94305      | US      |
| Palmer, Nicholette   | Wake Forest Baptist Health                                               | Biochemistry                                      | Winston-Salem          | North Carolina    | 27157      | US      |
| Pankow, James        | University of Minnesota                                                  |                                                   | Minneapolis            | Minnesota         | 55455      | US      |
| Papanicolaou, George | National Heart, Lung, and Blood Institute, National Institutes of Health |                                                   | Bethesda               | Maryland          | 20892      | US      |
| Parker, Cora         | RTI International                                                        | Biostatistics and Epidemiology Division           | Research Triangle Park | North Carolina    | 27709-2194 | US      |
| Peloso, Gina         | Boston University                                                        | Department of Biostatistics                       | Boston                 | Massachusetts     | 02118      | US      |
| Peralta, Juan Manuel | University of Texas Rio Grande Valley School of Medicine                 |                                                   | Edinburg               | Texas             | 78539      | US      |
| Perez, Marco         | Stanford University                                                      |                                                   | Stanford               | California        | 94305      | US      |
| Perry, James         | University of Maryland                                                   |                                                   | Baltimore              | Maryland          | 21201      | US      |
| Peters, Ulrike       | Fred Hutchinson Cancer Research Center                                   | Fred Hutch and UW                                 | Seattle                | Washington        | 98109      | US      |

| Name                    | Institution(s)                                                           | Primary Department  | Institution City | Institution State | Zip Code | Country |
|-------------------------|--------------------------------------------------------------------------|---------------------|------------------|-------------------|----------|---------|
| Peyser, Patricia        | University of Michigan                                                   |                     | Ann Arbor        | Michigan          | 48109    | US      |
| Phillips, Lawrence S    | Emory University                                                         |                     | Atlanta          | Georgia           | 30322    | US      |
| Pleiness, Jacob         | University of Michigan                                                   |                     | Ann Arbor        | Michigan          | 48109    | US      |
| Pollin, Toni            | University of Maryland                                                   |                     | Baltimore        | Maryland          | 21201    | US      |
| Post, Wendy             | Johns Hopkins University                                                 | Cardiology/Medicine | Baltimore        | Maryland          | 21218    | US      |
| Powers Becker, Julia    | University of Colorado at Denver                                         | Medicine            | Denver           | Colorado          | 80204    | US      |
| Preethi Boorgula, Meher | University of Colorado at Denver                                         |                     | Denver           | Colorado          | 80204    | US      |
| Preuss, Michael         | Icahn School of Medicine at Mount Sinai                                  |                     | New York         | New York          | 10029    | US      |
| Psaty, Bruce            | University of Washington                                                 |                     | Seattle          | Washington        | 98195    | US      |
| Qasba, Pankaj           | National Heart, Lung, and Blood Institute, National Institutes of Health |                     | Bethesda         | Maryland          | 20892    | US      |
| Qiao, Dandi             | Brigham & Women's Hospital                                               |                     | Boston           | Massachusetts     | 02115    | US      |
| Qin, Zhaohui            | Emory University                                                         |                     | Atlanta          | Georgia           | 30322    | US      |
| Rafaels, Nicholas       | University of Colorado at Denver                                         | CCPM                | Denver           | Colorado          | 80045    | US      |
| Raffield, Laura         | University of North Carolina                                             | Genetics            | Chapel Hill      | North Carolina    | 27599    | US      |
| Rajendran, Mahitha      | Baylor College of Medicine Human Genome Sequencing Center                |                     | Houston          | Texas             | 77030    | US      |

| Name                         | Institution(s)                                                   | Primary Department                                                             | Institution City | Institution State | Zip Code   | Country |
|------------------------------|------------------------------------------------------------------|--------------------------------------------------------------------------------|------------------|-------------------|------------|---------|
| Ramachandran, Vasan S.       | Boston University                                                |                                                                                | Boston           | Massachusetts     | 02215      | US      |
| Rao, D.C.                    | Washington University in St Louis                                |                                                                                | St Louis         | Missouri          | 63130      | US      |
| Rasmussen-Torvik, Laura      | Northwestern University                                          |                                                                                | Chicago          | Illinois          | 60208      | US      |
| Ratan, Aakrosh               | University of Virginia                                           |                                                                                | Charlottesville  | Virginia          | 22903      | US      |
| Redline, Susan               | Brigham & Women's Hospital                                       | Medicine                                                                       | Boston           | Massachusetts     | 02115      | US      |
| Reed, Robert                 | University of Maryland                                           |                                                                                | Baltimore        | Maryland          | 21201      | US      |
| Reeves, Catherine            | New York Genome Center                                           | New York Genome Center                                                         | New York City    | New York          | 10013      | US      |
| Regan, Elizabeth             | National Jewish Health                                           |                                                                                | Denver           | Colorado          | 80206      | US      |
| Reiner, Alex                 | Fred Hutchinson Cancer Research Center, University of Washington |                                                                                | Seattle          | Washington        | 98109      | US      |
| Reupena, Muagututi'a Sefuiva | Lutia I Puava Ae Mapu I Fagalele                                 |                                                                                | Apia             |                   |            | WS      |
| Rice, Ken                    | University of Washington                                         |                                                                                | Seattle          | Washington        | 98195      | US      |
| Rich, Stephen                | University of Virginia                                           |                                                                                | Charlottesville  | Virginia          | 22903      | US      |
| Robillard, Rebecca           | University of Ottawa                                             | Sleep Research Unit, University of Ottawa Institute for Mental Health Research | Ottawa           |                   | ON K1Z 7K4 | CA      |
| Robine, Nicolas              | New York Genome Center                                           |                                                                                | New York City    | New York          | 10013      | US      |
| Roden, Dan                   | Vanderbilt University                                            | Medicine, Pharmacology, Biomedicla Informatics                                 | Nashville        | Tennessee         | 37235      | US      |

| Name                   | Institution(s)                                            | Primary Department              | Institution City | Institution State | Zip Code | Country |
|------------------------|-----------------------------------------------------------|---------------------------------|------------------|-------------------|----------|---------|
| Roselli, Carolina      | Broad Institute                                           |                                 | Cambridge        | Massachusetts     | 02142    | US      |
| Rotter, Jerome         | Lundquist Institute                                       | Pediatrics                      | Torrance         | California        | 90502    | US      |
| Ruczinski, Ingo        | Johns Hopkins University                                  |                                 | Baltimore        | Maryland          | 21218    | US      |
| Runnels, Alexi         | New York Genome Center                                    |                                 | New York City    | New York          | 10013    | US      |
| Russell, Pamela        | University of Colorado at Denver                          |                                 | Denver           | Colorado          | 80204    | US      |
| Ruuska, Sarah          | Blood Works Northwest                                     |                                 | Seattle          | Washington        | 98104    | US      |
| Ryan, Kathleen         | University of Maryland                                    |                                 | Baltimore        | Maryland          | 21201    | US      |
| Sabino, Ester Cerdeira | Universidade de Sao Paulo                                 | Faculdade de Medicina           | Sao Paulo        |                   | 01310000 | BR      |
| Saleheen, Danish       | Columbia University                                       |                                 | New York         | New York          | 10027    | US      |
| Salimi, Shabnam        | University of Maryland                                    | Pathology                       | Seattle          | Washington        | 98195    | US      |
| Salvi, Sejal           | Baylor College of Medicine Human Genome Sequencing Center |                                 | Houston          | Texas             | 77030    | US      |
| Salzberg, Steven       | Johns Hopkins University                                  |                                 | Baltimore        | Maryland          | 21218    | US      |
| Sadow, Kevin           | Lundquist Institute                                       | TGPS                            | Torrance         | California        | 90502    | US      |
| Sankaran, Vijay G.     | Harvard University                                        | Division of Hematology/Oncology | Boston           | Massachusetts     | 02115    | US      |
| Santibanez, Jireh      | Baylor College of Medicine Human Genome Sequencing Center |                                 | Houston          | Texas             | 77030    | US      |
| Schwander, Karen       | Washington University in St Louis                         |                                 | St Louis         | Missouri          | 63130    | US      |

| Name                   | Institution(s)                            | Primary Department  | Institution City | Institution State | Zip Code   | Country |
|------------------------|-------------------------------------------|---------------------|------------------|-------------------|------------|---------|
| Schwartz, David        | University of Colorado at Denver          |                     | Denver           | Colorado          | 80204      | US      |
| Sciurba, Frank         | University of Pittsburgh                  |                     | Pittsburgh       | Pennsylvania      | 15260      | US      |
| Seidman, Christine     | Harvard Medical School                    | Genetics            | Boston           | Massachusetts     | 02115      | US      |
| Seidman, Jonathan      | Harvard Medical School                    |                     | Boston           | Massachusetts     | 02115      | US      |
| Sériès, Frédéric       | Université Laval                          |                     | Quebec City      |                   | G1V 0A6    | CA      |
| Sheehan, Vivien        | Emory University                          | Pediatrics          | Atlanta          | Georgia           | 30307      | US      |
| Sherman, Stephanie L.  | Emory University                          | Human Genetics      | Atlanta          | Georgia           | 30322      | US      |
| Shetty, Amol           | University of Maryland                    |                     | Baltimore        | Maryland          | 21201      | US      |
| Shetty, Aniket         | University of Colorado at Denver          |                     | Denver           | Colorado          | 80204      | US      |
| Sheu, Wayne Hui-Heng   | Taichung Veterans General Hospital Taiwan |                     | Taichung City    |                   | 407        | TW      |
| Shoemaker, M. Benjamin | Vanderbilt University                     | Medicine/Cardiology | Nashville        | Tennessee         | 37235      | US      |
| Silver, Brian          | UMass Memorial Medical Center             |                     | Worcester        | Massachusetts     | 01655      | US      |
| Silverman, Edwin       | Brigham & Women's Hospital                |                     | Boston           | Massachusetts     | 02115      | US      |
| Skomro, Robert         | University of Saskatchewan                |                     | Saskatoon        |                   | SK S7N 5C9 | CA      |
| Smith, Albert Vernon   | University of Michigan                    |                     |                  |                   |            |         |
| Smith, Jennifer        | University of Michigan                    |                     | Ann Arbor        | Michigan          | 48109      | US      |
| Smith, Josh            | University of Washington                  |                     | Seattle          | Washington        | 98195      | US      |
| Smith, Nicholas        | University of Washington                  | Epidemiology        | Seattle          | Washington        | 98195      | US      |

| Name                | Institution(s)                      | Primary Department                                            | Institution City | Institution State | Zip Code | Country |
|---------------------|-------------------------------------|---------------------------------------------------------------|------------------|-------------------|----------|---------|
| Smith, Tanja        | New York Genome Center              |                                                               | New York         | New York          | 10013    | US      |
| Smoller, Sylvia     | Albert Einstein College of Medicine |                                                               | New York         | New York          | 10461    | US      |
| Snively, Beverly    | Wake Forest Baptist Health          | Biostatistical Sciences                                       | Winston-Salem    | North Carolina    | 27157    | US      |
| Snyder, Michael     | Stanford University                 |                                                               | Stanford         | California        | 94305    | US      |
| Sofer, Tamar        | Brigham & Women's Hospital          |                                                               | Boston           | Massachusetts     | 02115    | US      |
| Sotoodehnia, Nona   | University of Washington            |                                                               | Seattle          | Washington        | 98195    | US      |
| Stilp, Adrienne M.  | University of Washington            |                                                               | Seattle          | Washington        | 98195    | US      |
| Storm, Garrett      | University of Colorado at Denver    | Genomic Cardiology                                            | Aurora           | Colorado          | 80045    | US      |
| Streeten, Elizabeth | University of Maryland              |                                                               | Baltimore        | Maryland          | 21201    | US      |
| Su, Jessica Lasky   | Brigham & Women's Hospital          | Channing Department of Medicine                               | Boston           | Massachusetts     | 02115    | US      |
| Sung, Yun Ju        | Washington University in St Louis   |                                                               | St Louis         | Missouri          | 63130    | US      |
| Sylvia, Jody        | Brigham & Women's Hospital          |                                                               | Boston           | Massachusetts     | 02115    | US      |
| Szpiro, Adam        | University of Washington            |                                                               | Seattle          | Washington        | 98195    | US      |
| Taliun, Daniel      | University of Michigan              |                                                               | Ann Arbor        | Michigan          | 48109    | US      |
| Tang, Hua           | Stanford University                 | Genetics                                                      | Stanford         | California        | 94305    | US      |
| Taub, Margaret      | Johns Hopkins University            |                                                               | Baltimore        | Maryland          | 21218    | US      |
| Taylor, Kent D.     | Lundquist Institute                 | Institute for Translational Genomics and Populations Sciences | Torrance         | California        | 90502    | US      |

| Name                 | Institution(s)                                    | Primary Department                                         | Institution City                  | Institution State | Zip Code | Country |
|----------------------|---------------------------------------------------|------------------------------------------------------------|-----------------------------------|-------------------|----------|---------|
| Taylor, Matthew      | University of Colorado<br>Anschutz Medical Campus |                                                            | Aurora                            | Colorado          | 80045    | US      |
| Taylor, Simeon       | University of Maryland                            |                                                            | Baltimore                         | Maryland          | 21201    | US      |
| Telen, Marilyn       | Duke University                                   |                                                            | Durham                            | North Carolina    | 27708    | US      |
| Thornton, Timothy A. | University of Washington                          |                                                            | Seattle                           | Washington        | 98195    | US      |
| Threlkeld, Machiko   | University of Washington                          | University of Washington,<br>Department of Genome Sciences | Seattle                           | Washington        | 98195    | US      |
| Tinker, Lesley       | Fred Hutchinson Cancer Research Center            | Cancer Prevention Division of Public Health Sciences       | Seattle                           | Washington        | 98109    | US      |
| Tirschwell, David    | University of Washington                          |                                                            | Seattle                           | Washington        | 98195    | US      |
| Tishkoff, Sarah      | University of Pennsylvania                        | Genetics                                                   | Philadelphia                      | Pennsylvania      | 19104    | US      |
| Tiwari, Hemant       | University of Alabama                             | Biostatistics                                              | Birmingham                        | Alabama           | 35487    | US      |
| Tong, Catherine      | University of Washington                          | Department of Biostatistics                                | Seattle                           | Washington        | 98195    | US      |
| Tracy, Russell       | University of Vermont                             | Pathology & Laboratory Medicine                            | Burlington                        | Vermont           | 05405    | US      |
| Tsai, Michael        | University of Minnesota                           |                                                            | Minneapolis                       | Minnesota         | 55455    | US      |
| Vaidya, Dhananjay    | Johns Hopkins University                          |                                                            | Baltimore                         | Maryland          | 21218    | US      |
| Van Den Berg, David  | University of Southern California                 | USC Methylation Characterization Center                    | University of Southern California | California        | 90033    | US      |
| VandeHaar, Peter     | University of Michigan                            |                                                            | Ann Arbor                         | Michigan          | 48109    | US      |
| Vrieze, Scott        | University of Minnesota                           |                                                            | Minneapolis                       | Minnesota         | 55455    | US      |

| Name              | Institution(s)                                            | Primary Department                                            | Institution City | Institution State | Zip Code | Country |
|-------------------|-----------------------------------------------------------|---------------------------------------------------------------|------------------|-------------------|----------|---------|
| Walker, Tarik     | University of Colorado at Denver                          |                                                               | Denver           | Colorado          | 80204    | US      |
| Wallace, Robert   | University of Iowa                                        |                                                               | Iowa City        | Iowa              | 52242    | US      |
| Walts, Avram      | University of Colorado at Denver                          |                                                               | Denver           | Colorado          | 80204    | US      |
| Wang, Fei Fei     | University of Washington                                  |                                                               | Seattle          | Washington        | 98195    | US      |
| Wang, Heming      | Brigham & Women's Hospital, Mass General Brigham          |                                                               | Boston           | Massachusetts     | 02115    | US      |
| Wang, Jiongming   | University of Michigan                                    |                                                               |                  |                   |          | US      |
| Watson, Karol     | University of California, Los Angeles                     |                                                               | Los Angeles      | California        | 90095    | US      |
| Watt, Jennifer    | Baylor College of Medicine Human Genome Sequencing Center |                                                               | Houston          | Texas             | 77030    | US      |
| Weeks, Daniel E.  | University of Pittsburgh                                  | Department of Human Genetics                                  | Pittsburgh       | Pennsylvania      | 15260    | US      |
| Weinstock, Joshua | University of Michigan                                    | Biostatistics                                                 | Ann Arbor        | Michigan          | 48109    | US      |
| Weir, Bruce       | University of Washington                                  |                                                               | Seattle          | Washington        | 98195    | US      |
| Weiss, Scott T    | Brigham & Women's Hospital                                | Channing Division of Network Medicine, Department of Medicine | Boston           | Massachusetts     | 02115    | US      |
| Weng, Lu-Chen     | Massachusetts General Hospital                            |                                                               | Boston           | Massachusetts     | 02114    | US      |
| Wessel, Jennifer  | Indiana University                                        | Epidemiology                                                  | Indianapolis     | Indiana           | 46202    | US      |
| Willer, Cristen   | University of Michigan                                    | Internal Medicine                                             | Ann Arbor        | Michigan          | 48109    | US      |

| Name                    | Institution(s)                       | Primary Department                                        | Institution City | Institution State | Zip Code | Country |
|-------------------------|--------------------------------------|-----------------------------------------------------------|------------------|-------------------|----------|---------|
| Williams, Kayleen       | University of Washington             | Biostatistics                                             | Seattle          | Washington        | 98195    | US      |
| Williams, L. Keoki      | Henry Ford Health System             |                                                           | Detroit          | Michigan          | 48202    | US      |
| Williams, Scott         | Case Western Reserve University      |                                                           |                  |                   |          |         |
| Wilson, Carla           | Brigham & Women's Hospital           |                                                           | Boston           | Massachusetts     | 02115    | US      |
| Wilson, James           | Beth Israel Deaconess Medical Center | Cardiology                                                | Cambridge        | Massachusetts     | 02139    | US      |
| Winterkorn, Lara        | New York Genome Center               |                                                           | New York City    | New York          | 10013    | US      |
| Wong, Quenna            | University of Washington             |                                                           | Seattle          | Washington        | 98195    | US      |
| Wu, Joseph              | Stanford University                  | Stanford Cardiovascular Institute                         | Stanford         | California        | 94305    | US      |
| Xu, Huichun             | University of Maryland               |                                                           | Baltimore        | Maryland          | 21201    | US      |
| Yanek, Lisa             | Johns Hopkins University             |                                                           | Baltimore        | Maryland          | 21218    | US      |
| Yang, Ivana             | University of Colorado at Denver     |                                                           | Denver           | Colorado          | 80204    | US      |
| Yu, Ketian              | University of Michigan               |                                                           | Ann Arbor        | Michigan          | 48109    | US      |
| Zekavat, Seyedeh Maryam | Broad Institute                      |                                                           | Cambridge        | Massachusetts     | 02142    | US      |
| Zhang, Yingze           | University of Pittsburgh             | Medicine                                                  | Pittsburgh       | Pennsylvania      | 15260    | US      |
| Zhao, Snow Xueyan       | National Jewish Health               |                                                           | Denver           | Colorado          | 80206    | US      |
| Zhao, Wei               | University of Michigan               | Department of Epidemiology                                | Ann Arbor        | Michigan          | 48109    | US      |
| Zhu, Xiaofeng           | Case Western Reserve University      | Department of Population and Quantitative Health Sciences | Cleveland        | Ohio              | 44106    | US      |

| Name                | Institution(s)                          | Primary Department | Institution City | Institution State | Zip Code | Country |
|---------------------|-----------------------------------------|--------------------|------------------|-------------------|----------|---------|
| Ziv, Elad           | University of California, San Francisco | Medicine           | San Francisco    | California        | 94143    | US      |
| Zody, Michael       | New York Genome Center                  |                    | New York         | New York          | 10013    | US      |
| Zoellner, Sebastian | University of Michigan                  |                    | Ann Arbor        | Michigan          | 48109    | US      |
